# Supplementary material for: Effects of continuous and rotational cropping practices on soil fungal communities in pineapple cultivation
Source: PeerJ. 2022 Sep 6;10:e13937. doi: 10.7717/peerj.13937 (PMC9462375; doi:10.7717/peerj.13937)
Supplement: Supplemental Information 1 [file peerj-10-13937-s001.xlsx]

## Sheet: Sheet 0
Table S1 Sampling information for this study.
Table S2 Sequencing quality informantion.
Table S3 The fungal diversity index of soil from different pineapple fields.
Table S4. Relative abundance in phylum level.
Table S5. Relative abundance in genus level.
Table S6. RDA statistics of the continuous cropping soils in winter.
Table S7. RDA statistics of the rotational cropping soils in winter.

## Sheet: Table S1
Table S1 Sampling information for this study
X-R(Xuwen-Rotation）
Group	Samples collected in summer	Samples collected in winter	Forecrops
Duplicate1	XRS01, XRS06	XRW01, XRW06	sugarcane
Duplicate2	XRS02, XRS07	XRW02, XRW07	sugarcane
Duplicate3	XRS03, XRS08	XRW03, XRW08	sugarcane
Duplicate4	XRS04, XRS09	XRW04, XRW09	sugarcane
Duplicate5	XRS05, XRS10	XRW05, XRW10	sugarcane
X-C(Xuwen-Continuous）
Group	Samples collected in summer	Samples collected in winter	Forecrops
Duplicate1	XCS01, XCS0 6	XCW01, XCW06	pineapple
Duplicate2	XCS02, XCS07	XCW02, XCW07	pineapple
Duplicate3	XCS03, XCS08	XCW03, XCW08	pineapple
Duplicate4	XCS04, XCS09	XCW04, XCW09	pineapple
Duplicate5	XCS05, XCS10	XCW05, XCW10	pineapple
L-R(Leizhou-Rotation）
Group	Samples collected in summer	Samples collected in winter	Forecrops
Duplicate1	LRS01, LRS06	LRW01, LRW06	banana
Duplicate2	LRS02, LRS07	LRW02, LRW07	banana
Duplicate3	LRS03, LRS08	LRW03, LRW08	banana
Duplicate4	LRS04, LRS09	LRW04, LRW09	capsicum
Duplicate5	LRS05, LRS10	LRW05, LRW10	capsicum
L-C(Leizhou-Continuous）
Group	Samples collected in summer	Samples collected in winter	Forecrops
Duplicate1	LCS01, LCS06	LCW01, LCW06	pineapple
Duplicate2	LCS02, LCS07	LCW02, LCW07	pineapple
Duplicate3	LCS03, LCS08	LCW03, LCW08	pineapple
Duplicate4	LCS04, LCS09	LCW04, LCW09	pineapple
Duplicate5	LCS05, LCS10	LCW05, LCW10	pineapple
Note: 1) The soil samples collected in summer were on May 23 and 26, 2017, and May 26, 2017, for Xuwen and Leizhou, respectively.
2) The soil samples collected in winter were on December 5, 2017. and December 3, 2017, for Xuwen and Leizhou, respectively.

## Sheet: Table S2
Table S2 Sequencing quality informantion
		Sample ID	PE Reads	Raw Tags	Clean Tags	Effective Tags	Average Length(bp)	GC(%)	Q20(%)	Q30(%)	Effective(%)
XCS	X-C-S (Xuwen-Continuous-Summer-Rhizosphere)	XCS01	80088	74258	71904	71719	239	51.46	99.3	98.03	89.55
		XCS02	80045	74184	71738	71573	243	51.39	99.24	97.92	89.42
		XCS03	80157	71952	69494	69253	244	52.88	99.21	97.83	86.4
		XCS04	80089	73960	71553	71357	242	52.05	99.26	97.95	89.1
		XCS05	79740	73763	71420	71222	242	52.19	99.25	97.91	89.32
		XCS06	79845	74584	72182	71974	242	52.65	99.3	98.03	90.14
		XCS07	80223	75072	72757	72523	241	52.88	99.31	98.06	90.4
		XCS08	79980	74618	72172	72026	261	52.01	98.85	97.16	90.06
		XCS09	79707	74680	72303	72099	244	52.81	99.28	97.98	90.46
		XCS10	80046	74858	72320	72092	243	52.45	99.29	98	90.06
XRS	X-R-S (Xuwen-Rotation-Summer-Rhizosphere)	XRS01	79138	72658	70264	70161	260	50.12	98.84	97.13	88.66
		XRS02	80027	72545	70288	70199	249	51.97	99.15	97.69	87.72
		XRS03	80197	72718	69516	69425	251	50.39	99.05	97.53	86.57
		XRS04	79613	73386	70959	70795	246	51.33	99.17	97.76	88.92
		XRS05	79655	73459	71056	70866	246	51.74	99.19	97.81	88.97
		XRS06	79793	69350	67552	67487	262	47.85	98.14	95.76	84.58
		XRS07	79852	73748	71362	71232	278	49.98	98.4	96.37	89.21
		XRS08	80428	74137	71927	71824	247	49.63	99.08	97.57	89.3
		XRS09	79874	73421	71114	70881	246	52.65	99.14	97.68	88.74
		XRS10	79898	67568	65355	65181	259	52.13	98.75	96.96	81.58
LCS	L-C-S (Leizhou-Continuous-Summer-Rhizosphere)	LCS01	79824	72821	70561	70413	247	51.69	99.12	97.65	88.21
		LCS02	79977	73501	71149	70992	257	49.54	98.93	97.33	88.77
		LCS03	80062	73051	70711	70449	246	52.02	99.15	97.69	87.99
		LCS04	80088	73573	71333	71174	247	50.8	99.16	97.74	88.87
		LCS05	79972	73200	70931	70756	247	51.35	99.14	97.7	88.48
		LCS06	79957	74956	72636	72515	236	48.34	99.36	98.14	90.69
		LCS07	80097	74149	71872	71708	248	51.37	99.13	97.69	89.53
		LCS08	80239	69824	67492	67330	242	51.25	99.23	97.87	83.91
		LCS09	79851	73641	71442	71303	245	50.65	99.21	97.84	89.3
		LCS10	80182	73813	71557	71402	248	50.84	99.2	97.83	89.05
LRS	L-R-S (Leizhou-Rotation-Summer-Rhizosphere)	LRS01	80311	73905	71551	71409	245	51.4	99.16	97.72	88.92
		LRS02	80022	73851	71455	71367	267	49.08	98.69	96.91	89.18
		LRS03	79961	73405	71125	70938	254	51.52	98.95	97.34	88.72
		LRS04	79635	72097	69804	69696	245	50.82	99.18	97.76	87.52
		LRS05	80440	73076	70842	70753	253	51.26	99.08	97.59	87.96
		LRS06	80214	71842	69056	69011	256	50.64	98.91	97.35	86.03
		LRS07	79973	73444	71459	71345	240	46.69	98.98	97.4	89.21
		LRS08	79832	69272	67051	66939	242	47.73	98.53	96.47	83.85
		LRS09	79710	69862	67583	67341	261	46.9	98.09	95.71	84.48
		LRS10	79825	73928	71260	71170	239	47.62	99.16	97.82	89.16
XCW	X-C-W (Xuwen-Continuous-Winter-Rhizosphere)	XCW01	80054	68932	66815	66780	242	50.01	98.83	97.01	83.42
		XCW02	79643	69734	67652	67624	246	49.76	98.6	96.56	84.91
		XCW03	79652	69275	67130	67093	248	49.43	98.55	96.48	84.23
		XCW04	80428	68777	66763	66723	251	47.27	98.48	96.37	82.96
		XCW05	80114	69335	67370	67327	251	49.23	98.42	96.24	84.04
		XCW06	79975	70298	68306	68235	252	50.82	98.57	96.51	85.32
		XCW07	80390	70271	68291	68229	251	51.65	98.57	96.46	84.87
		XCW08	79999	71076	69057	69030	259	48.01	98.29	96.08	86.29
		XCW09	79814	69433	67405	67334	250	50.18	98.55	96.46	84.36
		XCW10	80153	68871	66924	66823	254	47.85	98.23	95.94	83.37
XRW	X-R-W (Xuwen-Rotation-Winter-Rhizosphere)	XRW01	80010	69522	67505	67480	254	50.93	98.41	96.17	84.34
		XRW02	79536	69188	67232	67154	257	48.11	98.3	96.05	84.43
		XRW03	80023	69592	67538	67486	258	49.42	98.31	96.01	84.33
		XRW04	79608	68690	66700	66619	252	46.91	98.39	96.22	83.68
		XRW05	79532	68048	66065	66013	252	47.83	98.4	96.19	83
		XRW06	80294	69339	67353	67300	265	48.34	98.16	95.78	83.82
		XRW07	80128	69419	67463	67374	254	49.48	98.5	96.38	84.08
		XRW08	80516	70201	68316	68241	256	48.78	98.33	96.11	84.75
		XRW09	80228	67324	65468	65353	251	50.14	98.55	96.41	81.46
		XRW10	80026	69648	67685	67557	259	48.58	98.27	95.98	84.42
LCW	L-C-W (Leizhou-Continuous-Winter-Rhizosphere)	LCW01	79879	70332	68264	68207	264	50.58	98.29	96.04	85.39
		LCW02	80069	70847	68259	68225	254	50.39	98.63	96.69	85.21
		LCW03	80255	70446	68468	68436	258	48.46	98.33	96.16	85.27
		LCW04	80039	71888	69791	69753	259	50.75	98.51	96.46	87.15
		LCW05	79975	68877	66470	66417	259	49.33	98.29	95.99	83.05
		LCW06	79976	68546	66180	66059	248	48.9	98.51	96.38	82.6
		LCW07	80234	69409	66955	66854	260	49.38	98.04	95.54	83.32
		LCW08	80229	69147	65995	65899	256	49.85	98.36	96.11	82.14
		LCW09	79690	69452	66769	66727	260	49.2	98.05	95.57	83.73
		LCW10	79768	69961	67279	67118	253	49.83	98.43	96.27	84.14
LRW	L-R-W (Leizhou-Rotation-Winter-Rhizosphere)	LRW01	80156	69270	66711	66630	267	49.44	98.03	95.51	83.13
		LRW02	80166	67185	64698	64649	258	49.24	98.2	95.84	80.64
		LRW03	76080	65931	63880	63857	269	50.24	98.17	95.81	83.93
		LRW04	79989	65662	63643	63588	260	49.04	98.18	95.84	79.5
		LRW05	76396	64831	62808	62782	270	48.32	97.8	95.1	82.18
		LRW06	70566	60737	59036	58951	253	48.37	98.34	96.12	83.54
		LRW07	66004	55921	54349	54206	251	48.97	98.35	96.13	82.13
		LRW08	70863	58358	55518	55500	254	47.21	98.32	96.12	78.32
		LRW09	63568	54921	53256	53223	258	48.63	98.24	95.93	83.73
		LRW10	58153	51413	49863	49838	251	48.02	98.36	96.2	85.7

## Sheet: Table S3
Table S3 The fungal diversity index of soil from different pineapple fields
		Sample ID	OTU	Shannon	Chao1	observed_species	PD_whole_tree
XCS	X-C-S (Xuwen-Continuous-Summer-Rhizosphere)	XCS01	1119	3.24891	1244.85	845	383.666
		XCS02	694	2.87927	793.66	549	261.336
		XCS03	677	3.08894	710.132	528	248.345
		XCS04	1058	3.62195	1175.25	831	368.295
		XCS05	1119	3.62441	1311.4	853	387.744
		XCS06	1030	4.97305	1138.57	828	389.465
		XCS07	1038	4.21452	1098.19	816	379.596
		XCS08	915	3.82845	1034.69	722	336.16
		XCS09	837	3.70671	877.641	661	303.3
		XCS10	1183	4.14808	1362.83	919	413.493
XRS	X-R-S (Xuwen-Rotation-Summer-Rhizosphere)	XRS01	1277	6.16316	1422.06	1065	455.087
		XRS02	2502	8.14976	2744.83	2131	823.012
		XRS03	1217	5.20246	1293.73	1027	465.591
		XRS04	1578	5.65442	1802.74	1286	550.916
		XRS05	1116	7.6248	1130.31	1085	552.84
		XRS06	2165	7.31285	2415.07	1808	712.753
		XRS07	1386	6.82346	1484.75	1169	502.628
		XRS08	2078	7.66162	2211.53	1732	690.194
		XRS09	1410	6.21044	1516.66	1121	480.868
		XRS10	1442	6.09708	1527.19	1156	504.161
LCS	L-C-S (Leizhou-Continuous-Summer-Rhizosphere)	LCS01	1563	6.3894	1641.2	1252	518.178
		LCS02	1480	5.85017	1629.67	1192	491.017
		LCS03	1377	5.64131	1477.03	1100	459.493
		LCS04	1396	6.24485	1486.52	1105	478.281
		LCS05	1505	6.47514	1702.53	1232	520.918
		LCS06	1037	4.95278	1141.15	850	373.319
		LCS07	1538	6.45311	1736.55	1300	547.097
		LCS08	1450	5.97656	1582.01	1207	516.992
		LCS09	1180	5.70532	1237.8	951	412.88
		LCS10	1409	5.51576	1533.01	1114	465.957
LRS	L-R-S (Leizhou-Rotation-Summer-Rhizosphere)	LRS01	1613	6.22141	1820.28	1340	566.736
		LRS02	1938	7.06171	2057.75	1694	712.11
		LRS03	1935	7.2093	2101.31	1652	688.407
		LRS04	2001	7.34824	2143.12	1659	670.176
		LRS05	1766	6.83521	1970.51	1450	603.618
		LRS06	1503	7.15215	1572.84	1386	714.169
		LRS07	1423	8.08109	1434.44	1406	627.884
		LRS08	2913	8.6515	2822.25	2681	1143.29
		LRS09	2071	8.74664	2089.95	1999	862.903
		LRS10	1955	7.62105	2113.43	1752	750.573
XCW	X-C-W (Xuwen-Continuous-Winter-Rhizosphere)	XCW01	1494	6.35449	1736.02	1275	552.096
		XCW02	1333	6.35333	1395.26	1117	493.719
		XCW03	1246	5.18705	1383.39	1121	505.346
		XCW04	1091	6.25449	1116.79	1020	505.375
		XCW05	1289	6.8285	1425.02	1140	499.302
		XCW06	941	4.92765	1003.12	882	414.517
		XCW07	864	4.7187	899.33	814	414.31
		XCW08	1152	6.06269	1211.44	1084	507.449
		XCW09	1069	5.97638	1084.78	1017	488.965
		XCW10	1258	6.93659	1269.8	1184	561.675
XRW	X-R-W (Xuwen-Rotation-Winter-Rhizosphere)	XRW01	1290	7.08665	1264.01	1189	522.748
		XRW02	1161	7.97481	1129.63	1110	514.303
		XRW03	1209	7.58253	1196.23	1143	505.429
		XRW04	1321	7.23276	1273.79	1229	549.212
		XRW05	1196	7.75507	1244.03	1142	522.18
		XRW06	1252	7.02578	1250.94	1164	534.262
		XRW07	893	7.00376	896.722	857	421.197
		XRW08	1148	7.78057	1125.66	1103	519.196
		XRW09	893	6.3747	873.538	837	410.084
		XRW10	954	6.86836	941.862	906	455.183
LCW	L-C-W (Leizhou-Continuous-Winter-Rhizosphere)	LCW01	1378	7.79502	1359.86	1308	599.568
		LCW02	1322	7.03074	1313.77	1190	531.134
		LCW03	1545	7.87212	1487.03	1416	631.995
		LCW04	1203	6.04591	1182.84	1051	469.336
		LCW05	1491	7.89987	1477.08	1387	608.911
		LCW06	1235	7.37542	1199.14	1157	528.307
		LCW07	1466	7.69108	1437.69	1381	599.62
		LCW08	1381	7.9669	1352.89	1312	603.825
		LCW09	1053	6.74396	1018.88	999	475.976
		LCW10	997	7.27595	968.78	955	445.062
LRW	L-R-W (Leizhou-Rotation-Winter-Rhizosphere)	LRW01	1274	7.73074	1246.67	1210	562.748
		LRW02	1265	7.56968	1227.16	1196	569.943
		LRW03	1236	7.47281	1468.9	1232	593.909
		LRW04	1244	7.4036	1209.29	1142	523.517
		LRW05	1179	7.39275	1151.9	1114	529.953
		LRW06	933	6.92872	942.061	920	458.117
		LRW07	750	6.58106	737.244	721	386.936
		LRW08	1010	7.68076	999.808	987	513.485
		LRW09	1094	7.43867	1085.83	1062	517.847
		LRW10	1289	7.11351	1274.82	1227	611.579
Note: OTU, operational taxonomic unit.

## Sheet: Table S4
Table S4. Relative abundance in phylum level.
Taxonomy	LCS06	LCS02	LCS10	LCS03	LCS07	LCS01	LCS04	LCS08	LCS05	LCS09	LRS10	LRS05	LRS06	LRS09	LRS08	LRS07	LRS01	LRS03	LRS02	LRS04	XRS03	XRS04	XRS10	XRS05	XRS01	XCS08	XCS10	XCS02	XCS09	XCS05	XCS03	XCS01	XCS07	XCS04	XCS06	XRS02	XRS07	XRS06	XRS08	XRS09	XCW10	XCW05	XCW06	XCW02	XCW03	XCW07	XCW09	XCW04	XCW08
Ascomycota	0.778143	0.633683	0.83355	0.726062	0.802844	0.58077	0.772808	0.80586	0.776659	0.832791	0.776604	0.550835	0.658806	0.69176	0.684267	0.661197	0.443483	0.518898	0.448366	0.535251	0.596343	0.626988	0.857458	0.672584	0.568808	0.89244	0.909343	0.817283	0.904105	0.883568	0.874486	0.80417	0.890956	0.882188	0.886462	0.570465	0.782528	0.687285	0.785252	0.799327	0.751668	0.65115	0.697422	0.554214	0.587705	0.705314	0.741899	0.627526	0.713803
Basidiomycota	0.0405362	0.229715	0.0323811	0.038489	0.0319938	0.0825469	0.0450013	0.0614859	0.0330405	0.0685794	0.0349633	0.198216	0.0431381	0.0463655	0.0440227	0.0442727	0.0916722	0.143472	0.167297	0.0929784	0.033224	0.0567873	0.0198935	0.0702075	0.0470588	0.0442318	0.0446514	0.0225696	0.0325996	0.0572929	0.0361676	0.0340412	0.0336121	0.0197576	0.0403082	0.0519607	0.0307335	0.0789193	0.0213326	0.0249864	0.0391982	0.127764	0.0504741	0.0465418	0.0816001	0.0561538	0.0358562	0.100731	0.0478495
Zygomycota	0.0231919	0.0173986	0.0145901	0.0261064	0.0443993	0.0101311	0.0147981	0.0199671	0.028945	0.016049	0.0198503	0.023588	0.0144725	0.00951661	0.0166608	0.0257164	0.0134054	0.025132	0.0175758	0.0129395	0.0509435	0.0259062	0.0170977	0.014064	0.0202889	0.00938961	0.0113782	0.00877861	0.00884847	0.0107886	0.0077235	0.0201146	0.0118489	0.00889645	0.0101083	0.0374953	0.0503688	0.0402501	0.0354058	0.0285758	0.0139423	0.00881905	0.0248146	0.0187148	0.013319	0.0351798	0.0171181	0.0340171	0.0345261
Chytridiomycota	0.00621403	0.00146344	0.0018577	0.00172851	0.00137513	0.000817027	0.00273195	0.00250873	0.00235213	0.00190994	0.00199085	0.0089676	0.00663556	0.0050662	0.00431566	0.002864	0.0185298	0.00325485	0.00906725	0.00583349	0.00109327	0.0108558	0.00105368	0.00477886	0.00830074	0.00126849	0.000246164	0.00486008	0.00124646	0.00102553	0.000913533	0.000678332	0.000640096	0.0007333	0.00152735	0.0266535	0.00102165	0.00376009	0.0039572	0.00131287	0.00112214	0.00112242	0.00236255	0.051699	0.00413778	0.000228144	0.00139084	0.00350489	0.00291595
Cercozoa	0.000320625	2.95644e-05	8.574e-05	0.000149009	7.31454e-05	0	0.000166953	0.000440128	0	1.37406e-05	0.000406888	0.000320272	9.77872e-05	0.000237915	0.000117433	0.000775668	0.00052376	0.00204035	3.1927e-05	0.000729186	1.41983e-05	0.00040413	4.21473e-05	3.20729e-05	0.00895522	0	0	0	2.73946e-05	1.36737e-05	0.000442925	6.92176e-05	0.000156468	1.38359e-05	0.00011108	5.72885e-05	0.000223923	0.000113942	9.75365e-05	8.38001e-05	0.000230578	0.000224485	0.000125168	0.000253116	0.000296671	0.000304192	0.000565507	0.000333799	0
Glomeromycota	0.00169473	7.39109e-05	7.145e-05	7.45045e-05	0.00155068	5.44685e-05	4.55325e-05	0.000117367	2.76721e-05	0.000109925	0.000682991	0.0022419	0.000502906	0.00328883	0.000308261	0.00031325	0.00321334	0.0016841	0.00225085	0.00333138	0.00017038	0.00143536	4.21473e-05	0.00022451	0.00105356	0.000248183	6.83789e-05	1.38464e-05	0.00015067	0.000150411	9.68898e-05	0.000166122	0.000625871	0.000760972	0.000541516	0.000887972	0.000517823	0.00371737	0.000306543	9.77667e-05	0.000215206	6.41385e-05	0.000547611	0.000648611	0.000874399	0.00038024	0.000473803	9.1036e-05	0.000558373
Blastocladiomycota	0	0	0	0	0	0	0	0	0	0	0	0	0	0	0	0	0	8.09664e-05	0.000670466	7.14888e-05	0	2.78711e-05	0	0	0	0	0	0	0	0	0	0	0	0	0	0	0	0	1.39338e-05	0	0	0	0	0	0	0	0	0	0
Rozellomycota	0	0	0	0	0	0	3.0355e-05	1.46709e-05	0	1.37406e-05	7.26586e-05	0.000240204	0	0	0	0	0.000212335	0.000518185	9.57809e-05	0	0	0.000139355	0	0	0	0	0	1.38464e-05	0	0	0	0	0	0	0	2.86443e-05	0	0	0	0	0	0	0	0	0	0	0	0	0
Fungi_phylum_Incertae_sedis	1.52679e-05	0	0	0	0	0	0	0	0	0	0	0	0	0	0	0	0	1.61933e-05	6.38539e-05	0	0	0	0	0	0	0	0	0	0	0	0	0	0	0	0	1.43221e-05	0	0	0	1.39667e-05	0	0	0.00015646	0	0	0	0	0	0
Streptophycophyta	0	0	0	0	1.46291e-05	0	1.51775e-05	0	0	0	0	0	0	0	0	0	0	0	0	0	0	0	0	0	0	0	0	0	4.1092e-05	0	0	1.38435e-05	0	0	0	0	1.39952e-05	0	1.39338e-05	0	0	0	0	0	0	0	0	1.51727e-05	0
Others	0.149885	0.117637	0.117464	0.207391	0.117749	0.325681	0.164403	0.109607	0.158976	0.0805337	0.165429	0.215591	0.276347	0.243765	0.250308	0.264861	0.42896	0.304903	0.354581	0.348865	0.318212	0.277456	0.104413	0.238109	0.345534	0.0524219	0.0343125	0.146481	0.0529812	0.0471607	0.0801694	0.140747	0.0621604	0.0876501	0.0609414	0.312437	0.134592	0.185954	0.15362	0.145603	0.193624	0.210855	0.224098	0.327928	0.312067	0.20244	0.202696	0.23378	0.200347
[truncated: 31 more columns]

## Sheet: Table S5
Table S5. Relative abundance in genus level.
Taxonomy	LCS06	LCS02	LCS10	LCS03	LCS07	LCS01	LCS04	LCS08	LCS05	LCS09	LRS10	LRS05	LRS06	LRS09	LRS08	LRS07	LRS01	LRS03	LRS02	LRS04	XRS03	XRS04	XRS10	XRS05	XRS01	XCS08	XCS10	XCS02	XCS09	XCS05	XCS03	XCS01	XCS07	XCS04	XCS06	XRS02	XRS07	XRS06	XRS08	XRS09	XCW10	XCW05	XCW06	XCW02	XCW03	XCW07	XCW09	XCW04	XCW08
Chaetomium	0.311831	0.291431	0.427628	0.306214	0.240195	0.270232	0.320989	0.384246	0.322449	0.37134	0.237637	0.0724614	0.130783	0.167912	0.232708	0.240726	0.00891808	0.0145416	0.0250786	0.0517007	0.223765	0.123357	0.520308	0.355383	0.0608987	0.676727	0.714669	0.643386	0.652362	0.599743	0.439672	0.579351	0.649	0.598442	0.528145	0.158517	0.221572	0.169802	0.345293	0.415788	0.190995	0.248521	0.435147	0.242153	0.136843	0.416651	0.378874	0.327593	0.32139
Trichoderma	0.0175123	0.0203551	0.0275225	0.0367903	0.0178914	0.0122009	0.0150257	0.0288724	0.0114839	0.0394081	0.00698976	0.00915977	0.00426073	0.00849498	0.00733956	0.00478826	0.000792718	0.00136024	0.00151653	0.00137259	0.00609107	0.00678661	0.0159317	0.012765	0.000734296	0.038041	0.042094	0.0223481	0.0289561	0.0656885	0.031157	0.0213052	0.0405821	0.0461149	0.0501527	0.0057575	0.0185157	0.00827506	0.0161353	0.0151399	0.00854675	0.00752024	0.0119379	0.0392172	0.010524	0.008563	0.00930794	0.0279177	0.00652987
Penicillium	0.0689039	0.0460317	0.0654625	0.0346446	0.0966543	0.038836	0.0865421	0.0501306	0.107146	0.0610907	0.0701301	0.0685701	0.109913	0.0429647	0.0540632	0.0490162	0.0117492	0.0311721	0.0215986	0.0199454	0.0159305	0.0418623	0.0184605	0.0583566	0.0219012	0.00557034	0.00567545	0.00634165	0.0278603	0.0130721	0.00959209	0.00951049	0.0188046	0.0188583	0.0162038	0.027341	0.043847	0.0250958	0.0191729	0.0293719	0.0101915	0.00468211	0.00300404	0.0113744	0.0132877	0.0162895	0.00936908	0.0251715	0.0195896
Neurospora	0.00671786	0.0132301	0.00501579	0.00561764	0.00178475	0.00102128	0.00493269	0.00274346	0.0310758	0.00813444	0.00428686	0.00574888	0.0134248	0.00373667	0.00198168	0.00323692	0.0295146	0.000421025	0.000335233	0.0430649	0.016825	0.0228543	0.00297841	0.00853138	0.00111741	0.000758338	0.000314543	0.000263081	0.000808142	0.00113492	0.000470608	0.000387618	0.000469403	0.000290553	0.000624826	0.0108848	0.032035	0.0386122	0.00143518	0.00606154	1.53718e-05	0	1.5646e-05	0.000189837	0	0.000121677	7.64199e-05	0.000106209	0.00138042
Marasmius	0	0.169759	5.716e-05	0	2.92582e-05	1.36171e-05	3.0355e-05	0	0	1.37406e-05	0	0	0	0	0	5.96668e-05	0	0.000372446	0.000606612	2.85955e-05	0	0	0	0	0	0	0	2.76928e-05	2.73946e-05	0	0	0	0	0	1.3885e-05	0.0017473	0	2.84856e-05	1.39338e-05	5.58667e-05	0	0.0165638	0	0	3.12285e-05	0	0.000122272	6.06907e-05	0
Leucoagaricus	0.000122143	1.47822e-05	0.00208634	0.000372523	4.38872e-05	0	7.58875e-05	2.93419e-05	0.000719474	1.37406e-05	0.00334229	0.159495	0.000111757	1.3995e-05	0.000543127	0.00101433	2.83114e-05	8.09664e-05	0.00073432	0	2.83966e-05	1.39355e-05	0	0	0	0	4.10273e-05	0.000124617	0.000123276	0	0.000221462	4.15305e-05	0	0	0	2.86443e-05	0	0	2.78676e-05	4.19e-05	0.000983798	1.60346e-05	0	0	0	0	0.00117687	0	0
Micropsalliota	0	2.95644e-05	1.429e-05	0	1.46291e-05	0	0	0	1.3836e-05	0	0.00217976	0.000352299	0	0.00131553	2.93582e-05	0	0	0.00375684	0.00407069	2.85955e-05	5.67932e-05	0	5.61964e-05	1.60364e-05	0	0	0	0	0	0	0	0	0	0	0	0	0	8.54567e-05	0	4.19e-05	0	0	0.000187752	0	0	0	0	0	0
Fusarium	0.0353757	0.0277609	0.0473999	0.0354195	0.0307796	0.0378964	0.0341797	0.0695109	0.0323072	0.0510051	0.099208	0.0645828	0.033569	0.058919	0.0441401	0.0566983	0.0525742	0.0164686	0.0133455	0.147796	0.0379236	0.0295851	0.0794195	0.0648193	0.0139197	0.039861	0.0418889	0.0420238	0.0569534	0.0621197	0.0859967	0.0334321	0.0389178	0.0750595	0.0474035	0.0310217	0.0249255	0.0213642	0.0706722	0.0490649	0.0146186	0.0239397	0.0193541	0.0210878	0.0170664	0.0160613	0.0160482	0.02197	0.026166
Zopfiella	0.000473304	0.000118257	0.00011432	0.000715244	0.000131662	0.000108937	0.000318728	0.000337431	6.91802e-05	9.61842e-05	0.000799244	0.000432367	0.000977872	0.00022392	4.40373e-05	0	0.000311425	0.000485798	0.000478904	0.000157275	4.25949e-05	0	0.000885093	0.000304692	0.000223482	0.000151668	0.000109406	0.000401545	2.73946e-05	0.000191432	0.00112115	0.000152279	0.000256038	0	2.77701e-05	0.000286443	0	4.27283e-05	0.000390146	0.000935767	7.68592e-05	0	0.000140814	6.32791e-05	0	0	0	4.5518e-05	4.65311e-05
Candida	0.00745072	0.0043164	0.00350105	0.00680972	0.00652457	0.00951836	0.00470503	0.014935	0.00574196	0.00777718	0.0153019	0.0367352	0.0267658	0.0178017	0.00995244	0.00881576	0.10277	0.0676879	0.00814137	0.0685149	0.00427369	0.0369431	0.00480479	0.0142564	0.0151808	0.00623216	0.00110774	0.000623087	0.00289013	0.00248862	0.0041109	0.00192425	0.00126597	0.00132824	0.00376284	0.0175589	0.00226722	0.0100127	0.0031769	0.00367324	0.0041504	0.00171571	0.00470945	0.00548946	0.00644869	0.00498874	0.006297	0.00201796	0.0161153
Clonostachys	0.00538956	0.00354772	0.00447277	0.010073	0.00355487	0.000939581	0.00412828	0.0101523	0.00149429	0.00100306	0.00193272	0.0076705	0.00231895	0.00516416	0.0245875	0.0212265	0.00294438	0.000518185	0.00138882	0.000243062	0.00259829	0.00664725	0.000224785	0.000801822	0.00015963	0.000537731	0.000738492	0.000401545	0.000808142	0.000328169	0.0533309	0.00405615	0.00197718	0.00524379	0.0104971	0.00398155	0.00813122	0.00780504	0.0663527	0.0035196	0.0951825	0.0311393	0.00580468	0.0172277	0.0435482	0.00375677	0.00751972	0.0099381	0.00392412
Volutella	0.000259554	0.00134518	0.00038583	0.000447027	0.000219436	0.000136171	0.000440148	0.000557495	0.000166033	0.000302293	0.00168568	0.00265825	0.00215132	0.00030789	0.000704597	0.00144692	0.0049828	0.000566765	0.000558722	0.00604795	0.000312362	0.00164439	0.000295031	0.000465057	0.000606593	0.000165456	0	5.53856e-05	0.000232854	0.000246127	2.76828e-05	6.92176e-05	7.11217e-05	5.53434e-05	5.55401e-05	0.000945261	0.000573804	0.000427283	0.00344165	0.000279334	9.22311e-05	0.000144312	3.1292e-05	0.00110738	0.00113984	0.000258563	0	0.0012745	0.00421882
Staphylotrichum	0.0139701	0.00393206	0.00578745	0.00178811	0.00501777	0.00125277	0.0099868	0.00225932	0.0047596	0.00230842	0.0668168	0.00203372	0.00318507	0.0025331	0.00145323	0.00119334	0.000339736	8.09664e-05	0.000303306	0.000529017	0.00477063	0.00202065	0.00356847	0.00357612	0.000303296	0.000248183	0.00035557	0.00049847	0.00252031	0.000560622	8.30484e-05	0.000359931	0.00042673	0.00156345	0.000416551	0.0023918	0.00272907	0.00514164	0.00222941	0.00571237	0	0	0	0	0	0	1.5284e-05	0	0
Mortierella	0.0224132	0.0163195	0.013204	0.0254508	0.0433021	0.00991326	0.0143276	0.019439	0.0280733	0.0157055	0.0196178	0.022419	0.0143049	0.00932068	0.0137397	0.0216292	0.0131648	0.0191243	0.0156282	0.0127965	0.0505317	0.0251815	0.0152573	0.0124603	0.0145423	0.00852096	0.0101611	0.00638318	0.00710891	0.0102826	0.00728058	0.0192148	0.00978635	0.00745752	0.0096501	0.0351465	0.049683	0.0393671	0.0344583	0.0274026	0.0119747	0.00814559	0.0219514	0.0173701	0.0073387	0.033674	0.0154215	0.031286	0.0312069
Cryptococcus	0.0127487	0.0128753	0.0104603	0.0111608	0.0112498	0.0180699	0.0127643	0.0164608	0.0165202	0.0121742	0.00379278	0.0031867	0.00695686	0.00355473	0.00346427	0.00216292	0.00423255	0.0152055	0.0105359	0.00406057	0.0232852	0.0106607	0.0131218	0.0132942	0.0143667	0.0278793	0.0331774	0.0171141	0.0235183	0.0300685	0.0157377	0.0166537	0.0235697	0.0124938	0.0224243	0.00621581	0.0135194	0.0158522	0.0117322	0.0149164	0.0241338	0.049531	0.0259098	0.0146491	0.0462807	0.0210197	0.0191661	0.0486132	0.0183022
Trichosporon	0.0184894	0.00815977	0.0131182	0.0168678	0.00942113	0.058894	0.00638973	0.0335964	0.0088274	0.01091	0.0127879	0.000544462	0.000558784	0.000153945	0.000146791	0.000179	0.00151466	0.00136024	0.00464537	0.00145837	0.000198776	0.00107304	4.21473e-05	0.000336765	0.000702371	0.00732141	0.00984656	0.00376622	0.00341063	0.0138925	0.0151979	0.0107979	0.00527723	0.00142509	0.007609	0.00040102	0.00034988	0.000185156	0.000139338	9.77667e-05	0.000845451	0.00307865	0.00704071	0.00386003	0.00318531	0.0031788	0.0019105	0.000257935	0.00426535
Viridispora	0.00241232	0.0017443	0.0037154	0.00187751	0.0260251	0.000762558	0.00188201	0.00168716	0.00164649	0.000865658	0.00284822	0.000544462	0.00479157	0.00376466	0.00427162	0.00317726	0	0	0	8.57866e-05	0.00539535	0.00225756	0.00435522	0.00234132	0.000478889	0.000330911	0.000506004	0.000886169	0.00020546	0.000273474	0.00152255	0.000456836	0.000341384	0.000484255	0.000569286	0.00244908	0.0158706	0.00431556	0.004208	0.006704	0.00347404	0.000481039	0.00128297	0.000648611	0.00110861	0.000136886	9.17039e-05	0.000485525	0.000170614
Boothiomyces	0.00348108	0.000162604	0.00161477	0.00134108	0.000263323	0	0.000151775	0.000733547	6.91802e-05	9.61842e-05	0.000232507	0.000432367	0.00196971	0.000321885	0.000146791	0.000402751	0	0.00118211	0.00683237	0	1.41983e-05	0.000139355	0	1.60364e-05	0.00748663	4.13639e-05	2.73515e-05	1.38464e-05	0.000287644	0.00010939	0	0	0.000298711	0.000498091	0.000805332	0.00183323	0.000769737	0.00106821	0.00135158	0.000195533	0.000814708	3.20693e-05	0.00209657	0.0516516	0.00320092	1.52096e-05	0	0.00324695	0.00210941
Myrothecium	0.0004275	0.000458248	0.00054302	0.000610937	0.00220899	0.000204257	0.00054639	0.000777559	0.000332065	0.00169009	0.000697522	0.000704597	0.000209544	0.000559801	0.000190828	8.95001e-05	0.000127401	0.000842051	0.00121322	0.000457528	0.00215814	0.00139355	4.21473e-05	8.01822e-05	0.000989704	0.000124092	4.10273e-05	2.76928e-05	0.000219157	9.5716e-05	4.15242e-05	2.7687e-05	0	2.76717e-05	2.77701e-05	0.00156111	0.00153947	0.00139579	9.75365e-05	0.000195533	9.22311e-05	0.000128277	0.000140814	0	1.56143e-05	7.60479e-05	0.000137556	7.58633e-05	0.00040327
Codinaeopsis	0.0110234	0.012624	0.00853113	0.0065415	0.00560294	0.000354045	0.000956183	0.000117367	8.30163e-05	4.12218e-05	0.0354138	0.00547664	0.0116227	0.0238335	0.0128295	0.00936768	0	0.000291479	0.000143671	7.14888e-05	0.00109327	0.000627099	4.21473e-05	0.000144328	0.00151648	0	0	4.15392e-05	0.000465709	4.10212e-05	0.0144643	0.00182734	0.00166425	5.53434e-05	0.000458206	0.00714674	0.0163464	0.0196835	0.000961431	0.001257	0.0232576	0.0105668	0.0043183	0.00174018	0.00430954	0.000182515	9.17039e-05	0	0.000170614
Simplicillium	3.05357e-05	0.00047303	7.145e-05	0.000759946	0.000731454	6.80856e-05	4.55325e-05	0.000278748	0.000332065	0.000398478	0.000101722	0	4.19088e-05	0	0	0	0	0	0.000750283	0.000114382	0	2.78711e-05	0	0	0.000175593	0	0	0	4.1092e-05	0	2.76828e-05	2.7687e-05	7.11217e-05	0	1.3885e-05	1.43221e-05	0.000181938	1.42428e-05	0.000278676	5.58667e-05	3.07437e-05	8.01732e-05	0	0	0	0	0	0	0
Purpureocillium	0.00229018	0.00326686	0.00352963	0.00390404	0.00414003	0.000694473	0.00268642	0.00369707	0.0381875	0.00398478	0.00199085	0.00323474	0.00874497	0.00838302	0.00783865	0.00593684	0.000608694	0.000825857	0.00161231	0.00100084	0.00394713	0.00397163	0.0038354	0.00157157	0.00263389	0.00115819	0.00138125	0.00340621	0.00371197	0.00165452	0.00161944	0.00229802	0.000739666	0.00280868	0.00151347	0.00233451	0.00244916	0.00427283	0.00306543	0.00370117	0.000676361	0.000128277	1.5646e-05	0.0014396	0.000234214	0.000425868	3.0568e-05	0.000257935	0.000124083
Gymnopus	0.00218331	0.000162604	8.574e-05	0.000238415	0.000234065	0.000558302	0	0	0	0.0378279	0	0	0	0	0	0	0	3.23866e-05	1.59635e-05	1.42978e-05	0.000340759	2.78711e-05	0.000112393	6.41457e-05	4.78889e-05	0	2.73515e-05	0	2.73946e-05	0	0.000359877	0	0.00022759	1.38359e-05	1.3885e-05	0.00105984	1.39952e-05	0	0	0	4.61155e-05	6.41385e-05	0.000172106	1.58198e-05	0.000468428	0.000167305	6.11359e-05	3.03453e-05	0.000124083
Guehomyces	0.00119089	0.00164082	0.0002858	0.00049173	0.00333543	0.000367662	0.00443183	0.000865585	0.000871671	0.00068703	0.00268837	0.0067257	0.00504303	0.00527612	0.00189361	0.00307284	0.0224792	6.47731e-05	0.000973772	0.0337713	0.000738311	0.00590867	0.000576013	0.00157157	0	0.000730762	0.000177785	0.000180003	0.000753352	0.00169554	4.15242e-05	0.00027687	0.000156468	0.000193702	0.000499861	0.00842141	0.000391866	0.00347524	0.000613087	0.0006285	0	1.60346e-05	0	0	1.56143e-05	0.000121677	0	0	0
Ramichloridium	0	4.43466e-05	0	0	0	0	0	0	0	1.37406e-05	1.45317e-05	9.60815e-05	0	0	0	0.000104417	0	0.0337306	0.0204652	2.85955e-05	0	1.39355e-05	0	0	0.00312874	0	0	0	0	0	0	0	4.2673e-05	0	0	0	2.79904e-05	2.84856e-05	0	0	0.0140652	0.00117053	0.00225303	0.000569512	0.000265443	0.00117114	0.000810051	0.000864842	0.00623517
Acremonium	0.000839733	0.000901713	0.00180054	0.000610937	0.0016092	0.00110299	0.00177577	0.00102697	0.000428917	0.000535884	0.00186006	0.00225791	0.00737595	0.00716545	0.00383125	0.00396784	0.00128817	0.00220229	0.00555529	0.00118671	0.000738311	0.00171407	0.000365276	0.000914077	0.000846037	0.000220607	0.000287191	4.15392e-05	0.00105469	0.00142207	0.00186859	0.000567584	0.000625871	0.000456583	0.00193002	0.00105984	0.00541615	0.00505619	0.0041662	0.00156427	0.00293602	0.00851439	0.00704071	0.00249953	0.0314159	0.00272252	0.0019105	0.00417248	0.00114777
Pseudallescheria	0.000748126	0.000650416	0.00044299	0.00065564	0.000702196	0.00163405	0.00156328	0.00121769	0.00110688	0.00068703	0.0307927	0.00257819	0.00191384	0.00176337	0.00202572	0.00153642	0.00148635	0.00182984	0.00215507	0.00122961	0.00299584	0.00161652	0.00162969	0.000994259	0.00217096	9.65158e-05	5.47031e-05	0.000166157	0.000164368	0.000328169	2.76828e-05	0.000152279	9.95704e-05	2.76717e-05	0.00019439	0.00060153	0.0020573	0.00119639	0.00040408	0.00277937	3.07437e-05	0.000160346	0.000125168	0.000221477	0.000156143	6.08384e-05	0.000122272	0.000713115	0.000666946
Inocybe	0	0	0	0.000640739	0	0	0	0	0	0	0	0	0	0	0	0	0	0.0202254	0.0288939	0	0	0	0	0	0.000223482	0	0	0	0	0	0	0	0	0	0	0	0	0	1.39338e-05	0	7.68592e-05	3.20693e-05	4.69381e-05	0.000316396	6.24571e-05	0.000136886	0.00030568	0.000333799	0.000744498
Rhodotorula	0.000320625	0.000266079	0.00022864	0.000208613	0.000175549	0.000258725	0.000576745	0.000396115	0.000193705	0.000384737	0.000319698	0.0010569	0.000516875	0.00102164	0.000954142	0.000626501	0.00387866	0.000842051	0.00370353	0.00370312	0.000212974	0.00222969	0.000168589	0.000609385	0.000191556	0.000151668	4.10273e-05	1.38464e-05	0.000178065	0.000150411	0.000415242	0.000138435	9.95704e-05	9.6851e-05	0.000263816	0.000830684	0.00032189	0.000797596	0.000264742	0.0005866	0.00099917	0.00044897	0.000594549	0.000205657	0.000765099	0.00036503	0.000137556	0.0265673	0.000248166
Auricularia	0	0	0	1.49009e-05	0	0	0	0	0	0	7.26586e-05	0	0	0	1.46791e-05	0	2.83114e-05	0.00110114	0.000526795	0	0	0	0	0	7.98148e-05	0	0	0	0	0	0	0	0	0	0	0	0	0	0	0	0.000276693	0	0.000751009	0.000648611	0	0.000638803	0.000794767	0	0.000248166
Gliocladiopsis	0.00316045	0.00013304	0.00060018	0.000134108	0.00102404	0.000435748	0.000576745	0.000234735	0.000387409	0.000480921	0.000290634	0.000240204	4.19088e-05	0.000265905	7.33956e-05	2.98334e-05	0	9.71597e-05	0.00438996	2.85955e-05	0.000653121	0.000306582	0	0.000128291	0.000638519	0	0	0	0	0	0	0	0	0	0	4.29664e-05	0.000587799	0.000384555	4.18014e-05	2.79334e-05	0	3.20693e-05	0	0	0	0	0	0	0
Gibberella	0.00105348	0.00189212	0.00055731	0.000581135	0.00272101	0.000599153	0.00220074	0.000953611	0.000691802	0.00100306	0.0026593	0.00581293	0.00493127	0.00326084	0.00228994	0.00147675	0.0124995	0.00625061	0.00831697	0.01354	0.00126365	0.0117198	0.000491718	0.00330351	0.0233698	0.00140637	0.000410273	0.000429238	0.000342433	0.000970834	0.000636705	0.0011767	0.000241814	0.000124523	0.000555401	0.00623013	0.00113361	0.00398798	0.00182533	0.0031006	0.00058413	0.000352762	0.000923115	0.00117066	0.00124914	0.000456288	0.00105459	0.00276143	0.00184573
Talaromyces	0.00790876	0.00619374	0.00563026	0.00673521	0.00830932	0.00299577	0.00162399	0.00183387	0.0020339	0.0013191	0.00347308	0.00297853	0.00655174	0.0232737	0.0132406	0.0102627	0.000693629	0.00278524	0.00103763	0.000414635	0.00113586	0.00824984	0.00191068	0.00182815	0.00260196	0.00182001	0.000724816	0.00141233	0.00168477	0.00114859	0.00798649	0.00411152	0.00401127	0.00203387	0.00490142	0.00608691	0.0108323	0.0156955	0.0122478	0.00518164	0.00637932	0.00649403	0.00208092	0.00349617	0.0071201	0.00226623	0.00106988	0.0052194	0.00404821
Neolentinus	0	0	0	0	0	0	0	0	0	0	0	0	0	0	0	0	0	0.00931114	0.0230353	0	0	0	0	0	0	0	0	0	0	0	0	0	0	0	0	0	0	0	0	0	0	0	0	0	0	0	0	0	0
Aspergillus	0.00120616	0.00130083	0.00167193	0.00277157	0.000833858	0.00149788	0.00147222	0.0032276	0.000830163	0.00344889	0.000813776	0.00102487	0.00114551	0.0011196	0.000866068	0.00193917	0.00377957	0.00935972	0.00523602	0.00354585	0.00641763	0.00916958	0.0110004	0.00543635	0.0229388	0.000399851	0.000328219	0.000830783	0.000780747	0.000259801	0.000429084	0.000484523	0.00102415	0.000456583	0.000347126	0.00368079	0.00667572	0.00844597	0.00409653	0.00893867	0.0051342	0.00529143	0.00228432	0.00370183	0.00154581	0.00588611	0.00262884	0.00224555	0.0053821
Olpidium	0.000824465	0.000251297	0.00012861	0.000119207	0.000234065	0.000245108	0.000470503	0.000557495	0.000235213	0.000329775	0.00114801	0.00728618	0.0034924	0.00314888	0.00297986	0.000939751	0.0123579	0.000210513	0	0.000857866	0.000766708	0.00818016	0.000449571	0.00384874	0.000143667	0.000910006	2.73515e-05	4.15392e-05	0.00071226	0.000546949	4.15242e-05	0.000179966	0.000156468	5.53434e-05	0.000361011	0.0221993	0.000111962	0.000697896	0.00195073	0.0002095	0	0	0	0	0	3.04192e-05	0	0	0
Cyathus	1.52679e-05	0.0215524	0	4.47027e-05	2.92582e-05	0.000231491	1.51775e-05	4.40128e-05	0	0.000728252	0.000116254	0.000352299	0.000139696	2.799e-05	0.000440373	0.000492251	0.00240647	4.85798e-05	0	0.00138688	4.25949e-05	0.000153291	2.80982e-05	8.01822e-05	0	4.13639e-05	0	2.76928e-05	4.1092e-05	1.36737e-05	8.30484e-05	0	1.42243e-05	0	5.55401e-05	0.000257798	0	5.69711e-05	6.96689e-05	1.39667e-05	0	3.20693e-05	0	0	0	0	0	0	0.000139593
Pyrenochaetopsis	0.000641251	0.00047303	0.00154332	0.00125168	0.000380356	0.000313194	0.00112314	0.000997623	0.000152196	0.000329775	0.000377825	0.000320272	0.000419088	0.000797716	0.000543127	0.000343084	0.000693629	0.00157075	0.00137286	0.0012582	0.003294	0.00310762	0.000800798	0.000272619	0.00191556	8.27278e-05	5.47031e-05	2.76928e-05	4.1092e-05	0.000150411	0.000429084	0.000249183	0.000184917	0.00040124	0.000666482	0.00164705	0.00369474	0.00331857	0.00245235	0.000349167	0.00193685	0.00272589	0.0015646	0.0013605	0.00523078	0.0022206	0.0039127	0.00165382	0.00241962
Corynespora	0.0012367	0.00047303	0.00020006	0.000447027	0.000380356	0.000340428	0.00048568	0.000528154	0.000511934	0.000632068	0.00135145	0.00653354	0.0022072	0.00226719	0.0029505	0.000939751	0.0085925	9.71597e-05	9.57809e-05	0.00210177	0.000340759	0.00993604	0.000252884	0.00176401	0.00482082	0.000868642	8.20546e-05	0	0.000438314	0.000382864	4.15242e-05	0.000124592	0.000170692	8.30151e-05	0.00016662	0.020495	0.000153947	0.000797596	0.00224334	0.0003771	1.53718e-05	1.60346e-05	1.5646e-05	6.32791e-05	0	0	0	0	0
Tuber	0	0	0	0	0	0	0	0	0	0	0	0	0	0	0	5.96668e-05	0	0.00331962	0.00311288	0.000171573	0	0	0	0	0.00162822	0	0	0	0	0	0	0	0	0	0	0	0	0	0	0	7.68592e-05	0.000112242	0.000359859	0.000680251	0.00935294	0.000212934	0.00852846	0.000136554	0.000573884
Hypocrea	0.00697742	0.00475986	0.00840252	0.00734615	0.00472519	0.00178384	0.00415864	0.0037851	0.00790038	0.00518021	0.00356027	0.00349096	0.00507097	0.00934867	0.00481475	0.00378884	0.000169868	0.000356252	0.000111744	0.000543315	0.00492681	0.00359537	0.00627994	0.00793804	0.00103759	0.0191101	0.00813709	0.00765705	0.0143137	0.0159982	0.00292054	0.00492829	0.00630139	0.00976811	0.0144404	0.00146086	0.00447847	0.0178747	0.00338591	0.00818447	0.000799336	0.00113846	0.00342648	0.00406568	0.000359128	0.00425868	0.00198692	0.00374765	0.0154483
Leptosphaeria	0.000793929	0.000103475	0.00011432	0.00016391	0.000190178	0.000122554	9.1065e-05	1.46709e-05	4.15081e-05	6.8703e-05	0.000319698	0.00198568	0.00100581	0.00250511	0.00167342	0.000656334	0.00363801	0.000129546	0.0013569	0.00101514	0.000227173	0.00202065	5.61964e-05	0.000208474	0	0.000179244	2.73515e-05	1.38464e-05	0.000232854	0.00315863	1.38414e-05	6.92176e-05	8.53461e-05	6.91793e-05	0.00013885	0.0184183	1.39952e-05	0.00108245	0.00011147	0.000111733	3.07437e-05	0	0	0	0	0	0	0	0
Magnaporthe	0.00102295	0.0010791	0.00108604	0.00116227	0.00149217	0.00100767	0.00018213	0.000542824	0.00059495	0.0183849	2.90634e-05	8.00679e-05	4.19088e-05	4.19851e-05	1.46791e-05	0	0	0.00014574	0	4.28933e-05	0.000113586	0.000195097	0.00517006	0.000144328	6.38519e-05	0	0	0	2.73946e-05	0	0	0	0	0	1.3885e-05	2.86443e-05	4.19856e-05	0.000142428	6.96689e-05	0.00160617	0	0	0	0.000316396	0	1.52096e-05	1.5284e-05	0	0
Cladosporium	0.00561858	0.00304513	0.004287	0.00405305	0.00438872	0.00896006	0.0157542	0.00498812	0.0107783	0.00438325	0.000610332	0.00302657	0.0100581	0.00292496	0.00157067	0.00186459	0.000509605	0.00171649	0.00245838	0.000714888	0.00293905	0.00719074	0.00355442	0.00142724	0.011653	5.51519e-05	0.000464976	5.53856e-05	0.00109579	0.000136737	0.000179938	0.000110748	0.000142243	0.000179866	0.000208275	0.002979	0.0106504	0.00615288	0.00633987	0.00400844	0.00124512	0.000641385	0.000344213	0.00211985	0.000452814	0.000410659	0.000504371	0.000531043	0.00200084
Conocybe	0	0.004479	1.429e-05	1.49009e-05	2.92582e-05	0	4.55325e-05	0	0	0	2.90634e-05	0.000320272	0.00131314	4.19851e-05	4.40373e-05	4.47501e-05	0.000594539	0.000421025	0.000143671	0.000529017	4.25949e-05	0.000376259	5.61964e-05	3.20729e-05	0.00537952	0	0	0	0	0	0	0	0	0	0	0	0	0.000113942	0	0.0002095	0	0	0	0	0	6.08384e-05	0.000137556	0	0.000155104
Pseudeurotium	0.00120616	0.000650416	0.00018577	0.000238415	0.000438872	0.000476599	0.00125973	0.000396115	0.000760982	0.00195117	0.000624864	0.00642145	0.00357622	0.0042125	0.00227526	0.00140217	0.0163073	0.000242899	7.98174e-05	0.00115812	0.000482742	0.00636854	0.000491718	0.00569293	0.000175593	0.00117198	0.000177785	8.30783e-05	0.000794444	0.000628991	4.15242e-05	0.000179966	9.95704e-05	0.000511927	0.000527631	0.00353757	0.000167943	0.00190853	0.000459815	0.0007542	1.53718e-05	0	1.5646e-05	6.32791e-05	1.56143e-05	0	0.000122272	7.58633e-05	9.30622e-05
Ramicandelaber	0.000259554	8.86931e-05	0	8.94055e-05	0.000219436	8.17027e-05	4.55325e-05	0	5.53442e-05	2.74812e-05	0.000203444	0.000912774	6.9848e-05	6.99751e-05	1.46791e-05	0	0	0.000210513	0.000287343	1.42978e-05	0.000212974	0.000432002	1.40491e-05	3.20729e-05	0.00181978	0	0	0	0	0	0	0	0.000156468	1.38359e-05	0	0.00214832	0.000363876	0.000384555	0.000125404	0.0005028	0	0	9.38761e-05	0.000458774	0	0	0	0	0
Monascus	9.16072e-05	0.000147822	5.716e-05	0.000134108	8.77745e-05	0.000108937	0.000166953	0.000132038	8.30163e-05	0.000316034	0.000494078	0.000832706	0.00120139	0.000615781	0.000455053	0.0020585	0.00444488	0.0155617	0.00333637	0.00457528	0.000212974	0.00216001	0.000224785	0.000657494	0.00328837	0.000289547	4.10273e-05	5.53856e-05	5.47893e-05	0.000136737	0	8.30611e-05	4.2673e-05	4.15076e-05	0.00019439	0.000529919	2.79904e-05	0.000470012	0.000167205	5.58667e-05	0.000737849	0.000384831	0.00204963	0.00229387	0.00399725	0.00257042	0.00272055	0.00163865	0.0094303
Thermomyces	4.58036e-05	4.43466e-05	0	0	8.77745e-05	0	0.000166953	2.93419e-05	0	6.8703e-05	0	0.000208177	0.000209544	0.000125955	2.93582e-05	4.47501e-05	0.00152881	0.0149788	0.00938652	0.00114382	1.41983e-05	0.00025084	1.40491e-05	0.000112255	0.00308085	2.75759e-05	0	0	0	0.000136737	0	4.15305e-05	1.42243e-05	0	2.77701e-05	0.000372375	0	5.69711e-05	1.39338e-05	0	0.00122975	0.000384831	0.00111087	0.000759349	0.000140528	0.000562755	0.000427951	0.000697943	0.00375351
Basidioascus	0.00369483	0.00164082	0.00130039	0.00105796	0.00095089	0.00196086	0.00403722	0.00415187	0.00395711	0.00144276	0.000203444	0.000160136	0.00326889	0.00039186	0.000939463	0.000984502	0	0	0	2.85955e-05	0.010237	0.00958765	0.00174209	0.00166779	0.00108548	8.27278e-05	4.10273e-05	1.38464e-05	0	1.36737e-05	0	5.53741e-05	0	0	0	0.00250637	0.00530419	0.0120352	0.00132371	0.001257	0	0	0	0	0	0	0	0	0
Amyloflagellula	0	0	0	0	0	0	0	0	0	0	0	0	0	0	0	0	0	0	0	0	0	0	0	0	0	0	0	0	0	0	0	0	0	0	0	0	0	1.42428e-05	0	0	0	0	4.69381e-05	0	0	0	0	0	0
Chrysosporium	0	0	0	1.49009e-05	0	0	0	1.46709e-05	0	0	4.35951e-05	0.000176149	4.19088e-05	0	4.40373e-05	7.45835e-05	0.000424671	0.00118211	3.1927e-05	0.000357444	5.67932e-05	0.000139355	0.000252884	3.20729e-05	0.00183574	1.3788e-05	2.73515e-05	2.76928e-05	1.36973e-05	0	2.76828e-05	1.38435e-05	1.42243e-05	1.38359e-05	0	0.000114577	0.000153947	0.000170913	1.39338e-05	2.79334e-05	0.000107603	4.81039e-05	0.000281628	0.000822629	0.000296671	0.00074527	0.000473803	0.000212417	0.000806539
Humicola	0.00244286	0.00459726	0.00124323	0.0033378	0.00188715	0.000817027	0.00397651	0.000762888	0.00105154	0.0045344	0.00167115	0.00582894	0.00189987	0.00940465	0.0144296	0.0123063	0.0105318	0.010979	0.00370353	0.00756352	0.000440147	0.0046266	0.0015735	0.00606177	0.00432596	0.00102031	8.20546e-05	0.000110771	0.000588985	0.00198269	9.68898e-05	0.000290714	0.000113795	9.6851e-05	0.000485976	0.010713	0.000279904	0.00145276	0.00472355	0.00420397	0.000384296	0.000176381	0.000531965	0.00101247	0.000296671	0.00100383	0.00125329	0.000880015	0.00260574
Curvularia	0.00850421	0.004479	0.00755941	0.00260766	0.00591015	0.00964092	0.010093	0.0127784	0.00845382	0.0121467	0.000334229	0.000160136	0.000991842	0.000811711	0.0025982	0.002506	0.000169868	6.47731e-05	0.000143671	0.000114382	0.00339339	0.00234117	0.00554939	0.00094615	0.00239444	0.000482579	0.000218812	0.000221542	0.0015341	0.000355517	0.000276828	0.000359931	0.013186	0.000525762	0.000152735	0.00312223	0.00645179	0.0056259	0.00220154	0.0061593	0.000476527	0.000352762	0.000375505	0	0.000171757	0.00036503	0.000275112	0.00119864	0
Cyphellophora	0.000916072	0.00081302	0.00298661	0.000834451	0.000438872	0.000653621	0.000561568	0.00107098	0.000207541	0.000151147	0.00177287	0.00110494	0.00150872	0.00373667	0.0026716	0.00149167	0.000325581	0.000161933	0.000175598	5.71911e-05	0.000255569	0.00012542	8.42945e-05	0.000176401	0.000399074	4.13639e-05	1.36758e-05	1.38464e-05	0.00056159	0.000396538	0.00142566	0.000401462	0.00112372	0.000774808	0.000985837	0.000486953	0.00456244	0.000413041	0.00805373	0.00164807	0.00734774	0.00723162	0.00245643	0.00226223	0.0105709	0.00400012	0.0023843	0.00520422	0.00263676
Hyphoderma	3.05357e-05	1.47822e-05	1.429e-05	0	2.92582e-05	0	0	0	2.76721e-05	0	0.000116254	0.00227393	0.00322698	0.0011336	0.000484411	7.45835e-05	0	4.85798e-05	0.000111744	0	0	9.75487e-05	4.21473e-05	0	0	0	2.73515e-05	0	1.36973e-05	8.20423e-05	0	0	5.68974e-05	2.76717e-05	0.000291586	0.000100255	0	0.000526983	0.000390146	9.77667e-05	4.61155e-05	1.60346e-05	4.69381e-05	0.000506233	0	0	0.000382099	0.000121381	0
Phaeoacremonium	0.000198482	0.000177386	0.00018577	0.000193712	0.000102404	0.000217874	0.000318728	0.00032276	0.000290557	0.000261071	0.00186006	0.00206575	0.00293362	0.000629776	0.000455053	0.000596668	0.00719109	0.00684976	0.00280957	0.00609085	0.000312362	0.00112878	9.83436e-05	0.00072164	0.00241041	0.00013788	0	1.38464e-05	4.1092e-05	0.000150411	2.76828e-05	0	0.000142243	0.000110687	0.00019439	0.00103119	0.000111962	0.000598197	0.000390146	0.0002514	0.000630246	0.000176381	0.000610195	0.00219895	0.0003279	0.00264647	0.00142141	0.000697943	0.00214043
Ceratobasidium	9.16072e-05	0.000118257	0.00047157	1.49009e-05	0.000497389	1.36171e-05	0.000151775	0.000396115	6.91802e-05	8.24436e-05	0.000130785	0.000784665	0.000670541	0.000321885	0.000381657	0.000179	0.00182608	0.000712504	0.00186773	0.000629102	1.41983e-05	0.00154684	0.000182638	0.000320729	0	8.27278e-05	1.36758e-05	0	2.73946e-05	4.10212e-05	0.000124573	1.38435e-05	0	2.76717e-05	1.3885e-05	0.000916617	4.19856e-05	0.000170913	0.000153272	0.0015084	3.07437e-05	8.01732e-05	0.000172106	0.0012814	0	0	0.000183408	0	0
Rhizoctonia	6.10715e-05	0	1.429e-05	1.49009e-05	0	2.72342e-05	0.000106243	1.46709e-05	0.000110688	4.12218e-05	1.45317e-05	0.00110494	0.000195574	0.000559801	0.000807351	2.98334e-05	0.00199595	0	0	8.57866e-05	4.25949e-05	0.000738583	2.80982e-05	0.0122518	0	0.000110304	0	0	0.000109579	0.00010939	0	4.15305e-05	1.42243e-05	0	2.77701e-05	0.00183323	4.19856e-05	1.42428e-05	0.000167205	2.79334e-05	0.000107603	0	0	0	6.24571e-05	0	0	1.51727e-05	7.75518e-05
Phallus	0.000152679	0.000177386	8.574e-05	0.000104306	0.000190178	0.000204257	9.1065e-05	0.000132038	0.000262885	0.000370996	0.0011916	0.00182555	0.00245865	0.00036387	0.000366978	0.00138725	0.00634175	0	0	0.012196	0.000326561	0.000864003	0.00015454	0.000609385	0	0.000110304	6.83789e-05	1.38464e-05	0.000109579	8.20423e-05	2.76828e-05	0.000152279	4.2673e-05	4.15076e-05	6.94252e-05	0.000501275	0.000181938	0.000384555	0.000167205	0.0002933	0	0	0	0	0	0	0	0	0
Colletotrichum	4.58036e-05	0	8.574e-05	0	4.38872e-05	0	4.55325e-05	0	0	2.74812e-05	0.000130785	0.000192163	0.000111757	0.00013995	0.000102754	5.96668e-05	0.000707784	0.012064	0.00582667	0.000157275	1.41983e-05	0.000334453	2.80982e-05	4.81093e-05	0.00280948	0.000110304	1.36758e-05	4.15392e-05	0	2.73474e-05	0.00112115	0.00051221	1.42243e-05	0	9.71952e-05	0.000143221	0	2.84856e-05	8.36027e-05	1.39667e-05	0.00130661	0.00142708	0.000970054	0.00191419	0.000905627	0.000958204	0.00207862	0.00068277	0.00210941
Monographella	0.000793929	0.000502594	0.00032867	0.000402325	0.00064368	0.000204257	0.00162399	0.000601508	0.000373573	0.000508402	0.00319698	0.00685381	0.00440042	0.00268704	0.00205508	0.00159609	0.0106168	0.00126308	0.000303306	0.00873593	0.000425949	0.00901629	0.000365276	0.00202059	0.00105356	0.000579095	0.000164109	8.30783e-05	0.000452011	0.000519601	9.68898e-05	0.000110748	0.000142243	0.000110687	0.000249931	0.011558	0.000195933	0.00119639	0.0010311	0.000349167	9.22311e-05	9.62078e-05	1.5646e-05	0.000332215	0	0	0	4.5518e-05	0.000217145
Chaetosphaeria	0.0020459	0.00181821	0.00164335	0.00147519	0.00234065	0.00122554	0.00119902	0.00347701	0.00117606	0.00417714	8.71903e-05	0	0.000405118	0.00011196	0.000102754	0.000179	0.000297269	4.85798e-05	7.98174e-05	0.00038604	0.00843379	0.00402737	0.00210736	0.00126688	0.00312874	0.00020682	0.000806871	8.30783e-05	0.00112318	0.00180493	0.000512132	0.0017166	0.00032716	0.000235209	0.0014857	0.00610123	0.00967069	0.00985601	0.000710623	0.00236037	0.00102991	0.000432935	0.00131427	0.000268936	0.000765099	3.04192e-05	0	0.000106209	0.000310207
Lophiostoma	0.000167947	0.00147822	0.00015719	1.49009e-05	0.000277953	0	0.00464432	4.40128e-05	5.53442e-05	8.24436e-05	0.000159849	0.00044838	0.000153666	0.000433846	0.000264224	1.49167e-05	0.00158544	0.000485798	0.000175598	0.0012868	4.25949e-05	0.000432002	1.40491e-05	9.62186e-05	0	1.3788e-05	0	1.38464e-05	6.84866e-05	0.000259801	0	1.38435e-05	0	1.38359e-05	0	0.00124603	0	0.000270613	0	4.19e-05	6.14874e-05	3.20693e-05	6.25841e-05	0	0	3.04192e-05	0	9.1036e-05	0.000279187
Arnium	6.10715e-05	0.00033999	0.00048586	0.000268216	0.000102404	0.000204257	0.000166953	0.000234735	0.000484262	0.00169009	0.00050861	0.000496421	0.000488936	0.0002799	0.000176149	0.00031325	0.0016279	4.85798e-05	0	0.00220186	0.00066732	0.000919745	0.00514197	0.000801822	0.00186767	4.13639e-05	0	0	0	2.73474e-05	1.38414e-05	1.38435e-05	0.000184917	1.38359e-05	1.3885e-05	0.00160408	0.000531818	0.000697896	0.00158845	0.0035615	0	0	3.1292e-05	0	0	0	0	0	0
Malassezia	0.00050384	0.000192168	0.00010003	0.000253315	0.000336469	0.000503833	0.000333905	0.000190722	0.000401245	0.000522143	0.000755649	0.00148926	0.00166238	0.00106362	0.000807351	0.000716001	0.00972496	0.00390258	0.00225085	0.010995	0.000383354	0.00299614	0.000632209	0.00144328	0.000750259	0.000455003	9.57304e-05	8.30783e-05	0.000397222	0.000341843	6.9207e-05	0.000193809	0.000142243	0.000124523	0.000361011	0.00118874	0.000559809	0.000740625	0.000306543	0.000237433	0.000737849	3.20693e-05	0.000125168	0.000379675	4.68428e-05	0.000304192	0.000259828	0.000212417	0.000635925
Trichocladium	3.05357e-05	2.95644e-05	1.429e-05	8.94055e-05	0	0.000667239	0.0041131	8.80256e-05	0.00345901	8.24436e-05	0	0	0	0	0	0	0	0	0	0	0.000198776	6.96777e-05	4.21473e-05	0	0	0	0	0	0	0	0	0	0	0	0	5.72885e-05	0.00163744	4.27283e-05	5.57351e-05	0	0	0	0	0	0	0	0	0	0
Ilyonectria	0.000381697	0.000162604	0.00011432	7.45045e-05	0.000219436	0.000122554	0.000273195	0.000220064	0.000207541	0.000137406	0.000406888	0.00387529	0.00149475	0.00114759	0.00155599	0.000909918	0.0058463	0.000291479	0.00365564	0.00244492	0.000227173	0.00415279	0.000126442	0.00266205	0	0.000358487	4.10273e-05	2.76928e-05	0.000260249	0.000410212	1.38414e-05	1.38435e-05	5.68974e-05	4.15076e-05	0.00016662	0.0108419	0.000111962	0.000213642	0.000877829	0.000139667	0	0	0	0	0	0	1.5284e-05	0	0.000139593
Clitopilus	0.000641251	0.00113823	0.00030009	0.00107287	0.000204807	0.000149788	0.000865118	0.00325695	0.000290557	0.000151147	0.000334229	0.00381123	0.000880085	0.00407255	0.00173214	0.000686168	0.00379372	6.47731e-05	0.000478904	0.000900759	0.000269768	0.00395769	0.000351227	0.000801822	0	0.000468791	4.10273e-05	6.92319e-05	0.000657471	0.00069736	0.000276828	9.69046e-05	0.000170692	0.00305772	0.00011108	0.00910888	0.00127356	0.000712139	0.000473749	0.000656434	0	0	0	0	1.56143e-05	9.12575e-05	0	4.5518e-05	0.000232656
Rhizophlyctis	0.000839733	0.000177386	8.574e-05	1.49009e-05	0.000307211	8.17027e-05	0.00042497	0.000660192	0.000677966	0.000151147	7.26586e-05	0.000112095	4.19088e-05	0.000685756	0.000557806	0.000447501	0.000382203	0.000728698	0.0011813	8.57866e-05	0.000113586	8.36132e-05	2.80982e-05	3.20729e-05	0.00027137	0	4.10273e-05	0	1.36973e-05	4.10212e-05	0.000401401	0	0	0	0.00013885	0.000830684	2.79904e-05	0.00122488	0.000348345	8.38001e-05	3.07437e-05	0.000128277	0	0	0.000312285	0.000152096	3.0568e-05	0	7.75518e-05
Sistotrema	7.63394e-05	5.91287e-05	0	0.00016391	0.000394985	6.80856e-05	0.00030355	1.46709e-05	0	0	0	0	0	0	0	1.49167e-05	0	4.85798e-05	9.57809e-05	0	0	0	0	0	0	0	0	0	0	0	0	0	0	1.38359e-05	0	0	0	0	0	0	1.53718e-05	0	0	0	0	0	0	0	0
Lecanicillium	0.000137411	0.00203994	0.00038583	0.000581135	0.000775341	0.000231491	0.000409793	0.00112966	0.000152196	9.61842e-05	0.000465015	0.00136115	0.00181605	0.00121757	0.000748635	0.00031325	0.000254802	0.000696311	0.000638539	0.000900759	0.000837699	0.000292646	7.02454e-05	3.20729e-05	0.00264985	1.3788e-05	0	0.000304621	1.36973e-05	0.000205106	0.000996581	0.000152279	5.68974e-05	0.00016603	6.94252e-05	0.000257798	0.000489832	0.000897295	0.00306543	0.000349167	0.000599502	0.000481039	0	0.00117066	0.000687028	0.000760479	0.00210919	0.000895187	1.55104e-05
Gibellulopsis	4.58036e-05	8.86931e-05	0.00012861	1.49009e-05	0	0.000313194	0.000212485	0.000190722	0	0	0.000537673	0.000768652	8.38176e-05	8.39701e-05	0.000278903	0.000179	0.00019818	0.000275286	0	7.14888e-05	0	0.000306582	0	1.60364e-05	0.000830074	4.13639e-05	0	9.69247e-05	0.000315038	0.000123063	2.76828e-05	8.30611e-05	4.2673e-05	0.00033206	0.000263816	2.86443e-05	0	7.12139e-05	0.000264742	0	3.07437e-05	9.62078e-05	1.5646e-05	0.00245207	0.00137406	1.52096e-05	0.000351531	6.06907e-05	0
Pestalotiopsis	4.58036e-05	0	0.00015719	0	0	4.08513e-05	6.071e-05	0	0	0	2.90634e-05	3.20272e-05	0	0	0	0	0	0.00932733	0.00531584	0	0	4.18066e-05	0	0	0.00102163	1.3788e-05	0	0	0	0	0.000456766	0.000221496	0	1.38359e-05	0	0	1.39952e-05	0	0	1.39667e-05	0.00182925	0.000288623	0.000359859	7.90989e-05	1.56143e-05	6.08384e-05	0.00022926	0.000440007	0.00120981
Exophiala	0.00644304	0.0019069	0.00188628	0.00181791	0.00236991	0.00921879	0.00294444	0.00154045	0.00110688	0.00288553	0.00396716	0.000976828	0.00212338	0.00166541	0.00102754	0.000701084	0.00243478	0.000955404	0.000494868	0.00208747	0.00017038	0.000738583	0.000126442	0.000657494	0.000111741	5.51519e-05	5.47031e-05	5.53856e-05	0.000575287	0.00010939	0.00130109	0.000373775	0.000611647	0.000774808	0.000249931	0.000959583	0.00201531	0.00143852	0.00142125	0.000558667	0.00112214	0.00134691	0.00106393	0.000284756	0.000827556	0.000152096	0.000259828	7.58633e-05	0.000108573
Cortinarius	0	0	0	0	0	0	0	0	0	0	0	0	0	0	0	2.98334e-05	0	0.00903585	0.00416647	5.71911e-05	0	0	0	0	0.000925852	0	0	0	0	0	0	0	0	0	0	0	0	0	0	0	0.000184462	0.000112242	0.000469381	0.000616971	3.12285e-05	0.000456288	0.000565507	0.00022759	0.00152002
Hebeloma	0	0.00246862	0	1.49009e-05	0	0	0.00886366	0	0	1.37406e-05	1.45317e-05	0	1.39696e-05	1.3995e-05	4.40373e-05	0	0.000254802	0.00166791	0.000335233	7.14888e-05	0	0.00012542	5.61964e-05	3.20729e-05	0.00015963	0	0	0	5.47893e-05	0	0	0	0	0	0	0	0	0	0	0	0	4.81039e-05	6.25841e-05	0.000110738	1.56143e-05	0	7.64199e-05	0	0.000248166
Russula	0	0	0	0	0	0	0	0	0	0	0	0	0	0	0	0.00108892	0	0.00668783	0.00884377	0.000786377	0	0	0	0	0.000239444	0	0	0	0	0	0	0	0	0	0	0	0	0	0	0	7.68592e-05	3.20693e-05	0.000203398	0.000237297	7.80713e-05	0.000258563	9.17039e-05	6.06907e-05	0.00041878
Podospora	0.000259554	0.000147822	4.287e-05	8.94055e-05	0.00016092	0.000640004	0.000349083	5.86837e-05	8.30163e-05	0.000329775	0.000319698	0.00121703	0.00114551	0.000727741	0.00102754	0.000880085	0.00125986	0.000453412	0.000957809	0.0025736	8.51898e-05	0.00182555	0.000168589	0.00104237	0.000510815	0.000193032	1.36758e-05	1.38464e-05	6.84866e-05	0.000191432	1.38414e-05	2.7687e-05	1.42243e-05	0	8.33102e-05	0.00253502	4.19856e-05	0.000427283	0.000334411	0.0001257	3.07437e-05	0	0.000688425	0.000221477	0	3.04192e-05	0	6.06907e-05	7.75518e-05
Dimorphospora	0.000259554	0.000295644	5.716e-05	0.000149009	0.000204807	9.53198e-05	0.000258018	0.000234735	0.000235213	0.00067329	0.000363293	0.00832706	0.00162047	0.00158144	0.00082203	0.0002685	0.00850757	0	0	0.00201598	0.000298164	0.0061177	5.61964e-05	0.000384874	0	0.000248183	5.47031e-05	2.76928e-05	0.000191762	0.000232453	4.15242e-05	4.15305e-05	5.68974e-05	8.30151e-05	0.000208275	0.00087365	9.79665e-05	0.000783353	0.000125404	0.000139667	0	0	0	0	0	0	0	0	0
Sporobolomyces	0.000122143	7.39109e-05	0.00010003	4.47027e-05	0.000117033	6.80856e-05	0.00018213	5.86837e-05	9.68523e-05	0.000109925	0.000188912	0.000128109	0.000307331	0.000321885	0.000396336	0.000104417	0.000382203	0.00246138	0.00820523	0.000214466	0.000184578	0.000432002	0.000252884	0.000240547	0.00194748	2.75759e-05	0	2.76928e-05	6.84866e-05	5.46949e-05	0.000124573	5.53741e-05	2.84487e-05	8.30151e-05	6.94252e-05	0.000286443	0.000209928	0.000669411	0.000153272	0.0002933	0.00024595	0.00202036	0.000187752	0.000205657	0.000343514	0.000334611	0.000519655	0.000212417	0.000573884
Sphaerobolus	0	1.47822e-05	0	0	0	0	0	0	0	0	0	0	0	0	0	0	0	0	0	0	0	0	0	0	0	0.00013788	5.47031e-05	1.38464e-05	0	0	0.000166097	0.000581428	0.000384057	0	1.3885e-05	0	0	0	0	1.39667e-05	0.00156793	0.00110639	0.0031605	0.00406568	0.00117107	0.00806108	7.64199e-05	0	0
Mrakia	0.000442768	0.00013304	4.287e-05	5.96036e-05	0.000146291	0.000122554	0.00012142	0.000117367	0.00013836	0.000508402	0.000261571	0.00110494	0.00191384	0.00132953	0.000587165	0.000850251	0.0078564	0	0.00142075	0.0038461	0.000212974	0.00560208	7.02454e-05	0.000240547	3.19259e-05	0.000303335	8.20546e-05	5.53856e-05	0.000287644	0.000136737	0	1.38435e-05	2.84487e-05	4.15076e-05	0.000444321	0.00067314	0.000125957	0.000455769	0.000209007	9.77667e-05	0	0	0	0	0	0	0	0	0.000124083
Conlarium	0.000259554	7.39109e-05	0.00045728	0.000387424	0.000585163	0	0.0006071	0.000396115	0.000179869	0.000549624	0.000712054	0.000576489	8.38176e-05	0.000489826	0.000249545	0.00113367	0	0.000323866	7.98174e-05	0.000114382	0.000241371	0.000181162	0.000576013	0.000176401	0.000526778	0.000620459	0.00071114	0.000263081	0.000164368	0.000287148	0.000262987	0.00051221	0.000483628	0.000373568	0.000222161	0.000630174	0.000475837	0.000441526	0.00029261	0.000642467	0.000737849	0.00044897	0.000391151	0.000996646	0.000608956	0.000517126	0.000718347	0.000333799	9.30622e-05
Gerronema	0	1.47822e-05	0	0	0	0	0	0	0	0	0	0	0	0	0	2.98334e-05	0	0	0	0	0	0	0	0	9.57778e-05	0	0	0	0	0	0	0	0	0	0	0.00739022	0	2.84856e-05	0	2.79334e-05	0	0	0	0	0	0	0	0	0
Myrmecridium	0.000274822	0.000369555	0.00045728	0.000506631	0.00032184	0.000367662	0.000273195	0.000762888	0.00080249	0.00109925	0.00716414	0.000176149	0.000125726	5.59801e-05	0.000176149	0	0.000778563	0.000744891	0.000510831	0.000200169	0.000369156	0.00107304	0	0.000801822	0	2.75759e-05	1.36758e-05	4.15392e-05	2.73946e-05	1.36737e-05	0.000110731	1.38435e-05	1.42243e-05	0	0	0.000429664	4.19856e-05	0.000897295	8.36027e-05	4.19e-05	0.000107603	0	0	0	0.000515271	0	0	4.5518e-05	0
Epicoccum	0.000167947	0.000280862	5.716e-05	0.000104306	0.000204807	0.000136171	0.000698165	0.000102697	0.000221377	0.000329775	0.000639395	0.00222589	0.00185796	0.000951661	0.00082203	0.000581751	0.00690797	0.00275286	0.00159635	0.00523298	0.000383354	0.00450118	8.42945e-05	0.00109048	0.0014207	0.00020682	4.10273e-05	4.15392e-05	0.000136973	0.000218779	0	9.69046e-05	0.000128019	1.38359e-05	0.00019439	0.00154679	0.000125957	0.000526983	0.000306543	0.000223467	0.000107603	0.00460194	0.00015646	0.000237297	4.68428e-05	0.000425868	0.000427951	9.1036e-05	0.00139593
Arthrobotrys	0.00349634	0.00201038	0.0012861	0.00520042	0.00596866	0.00162044	0.00271677	0.00432792	0.00308544	0.00244583	0.00116254	0.000432367	0.00191384	0.00440843	0.00107158	0.000730918	0.000325581	0.000210513	6.38539e-05	2.85955e-05	0.00122105	0.000891874	0.00679976	0.00123481	0.00015963	0.000482579	0.000724816	0.00217388	0.00119167	0.0010392	0.00178554	0.000692176	0.000611647	0.000677957	0.000569286	0.000630174	0.000419856	0.000583954	0.00132371	0.0015503	0.000138347	0.0012026	0.000140814	7.90989e-05	1.56143e-05	0.000182515	0	0.000880015	0.000697967
Beauveria	1.52679e-05	2.95644e-05	1.429e-05	2.98018e-05	1.46291e-05	0	0	1.46709e-05	0	0	5.81269e-05	0	0	0	0	0	0	0	0	0	0	0	0	0	0	0	0	0	2.73946e-05	0	0	0	0	0	0	0.000300765	0	0	0	0	9.22311e-05	3.20693e-05	0	0	0	6.08384e-05	0.00157425	4.5518e-05	0
Hydropus	6.10715e-05	0.00013304	5.716e-05	0.000521532	2.92582e-05	0	0	0	1.3836e-05	0	0	0	0	0	0	0	0	0	0	0	0	2.78711e-05	0	0	0	0	2.73515e-05	0	5.47893e-05	0.000273474	0	0	5.68974e-05	1.38359e-05	0.000541516	0	0	0	0.00051555	2.79334e-05	0	1.60346e-05	6.25841e-05	0.00169272	0.00412217	0.00159701	0.00126857	0.00200279	0.000139593
Lectera	4.58036e-05	8.86931e-05	0.00022864	5.96036e-05	1.46291e-05	2.72342e-05	0.00030355	1.46709e-05	2.76721e-05	8.24436e-05	0.000348761	0.000384326	0.000237483	0.000433846	0.000220187	0	0.0011183	0.000501992	0.000287343	0.000285955	1.41983e-05	0.00052955	5.61964e-05	0.000112255	0.00584245	0.000151668	4.10273e-05	0	4.1092e-05	0.00010939	5.53656e-05	1.38435e-05	0	0	5.55401e-05	0.0016184	0.000377871	0.000142428	0.00167205	2.79334e-05	3.07437e-05	0	0	0	0	0	1.5284e-05	0	1.55104e-05
Phoma	0.000320625	0.000147822	0.00037154	4.47027e-05	0.000102404	0.000177022	0.000561568	1.46709e-05	0.000124524	0.000151147	0.00107535	0.000976828	0.00111757	0.000881686	0.000308261	0.0002685	0.00220829	0.00466367	0.00581071	0.00207318	0.000113586	0.0023133	0.000182638	0.000240547	0.00373533	0.000234395	5.47031e-05	2.76928e-05	5.47893e-05	5.46949e-05	0	6.92176e-05	8.53461e-05	4.15076e-05	0.000152735	0.000759073	6.99761e-05	0.000370312	0.00029261	0.0001676	0.00016909	0.00383228	0.000203398	0.000616971	0.0002186	0.000152096	0.000366815	0.000257935	0.00142695
Mycosphaerella	0	0	0.00012861	1.49009e-05	0	2.72342e-05	3.0355e-05	0	0	1.37406e-05	1.45317e-05	9.60815e-05	0.000167635	2.799e-05	1.46791e-05	0	0.00019818	0.0057972	0.00217103	0.000114382	0	0.000111484	8.42945e-05	0	0.000877963	0	0	0	0	0	0	5.53741e-05	0	1.38359e-05	0	0	0	0.0028628	1.39338e-05	1.39667e-05	0.00164479	0.000160346	0.000578903	0.000284756	0.000124914	6.08384e-05	0.00382099	0.000470353	0.000651435
Gliomastix	0	2.95644e-05	0.00094314	0	2.92582e-05	1.36171e-05	1.51775e-05	0	2.76721e-05	0	0	0	0	1.3995e-05	0	0	0	9.71597e-05	0	4.28933e-05	0	5.57421e-05	0	0	0	0	0	2.76928e-05	0	0	1.38414e-05	0	0	0	0	1.43221e-05	4.19856e-05	0	0	0	0	8.01732e-05	3.1292e-05	0.000110738	3.12285e-05	0	0.000137556	7.58633e-05	0
Chaetomidium	0.000122143	0.000295644	0.00010003	0.00016391	0.000219436	2.72342e-05	0.00145704	0.000205393	0.000193705	0.000123665	0.000581269	0.00169744	0.00036321	0.000587791	0.000645881	0.000954668	0.00421839	3.23866e-05	0	0.00563332	0.000113586	0.00130994	0.000168589	0.000352802	0	0.000165456	1.36758e-05	1.38464e-05	0.00015067	0.00069736	2.76828e-05	0.000110748	2.84487e-05	4.15076e-05	0.000152735	0.00230586	0.000111962	0.00051274	6.96689e-05	0.000181567	0	0	0	0	0	0	0	0	0
Suillus	0	0	0	0	0	0	0	0	0	0	0	0	0	0	0	0	0	0.000323866	0.00549144	0	0	0	0	0	6.38519e-05	0	0	0	0	0	0	0	0	0	0	0	0	0	0	0	0	0	1.5646e-05	0	0	6.08384e-05	0	0	0.000108573
Meyerozyma	0.00177107	0.000635634	0.00075737	0.000953658	0.00103866	0.00129363	0.00179095	0.0024207	0.00233829	0.00090688	0.000435951	0.000768652	0.000880085	0.00019593	0.000132112	0.00149167	0.0016279	0.000291479	0.000111744	0.00164424	7.09915e-05	0.000418066	4.21473e-05	0.000288656	0.0014207	4.13639e-05	1.36758e-05	2.76928e-05	0.00180805	5.46949e-05	0.00168865	5.53741e-05	4.2673e-05	0.00033206	8.33102e-05	0.000386698	0.000475837	0.000156671	9.75365e-05	5.58667e-05	0.0021828	0.000112242	7.82301e-05	1.58198e-05	3.12285e-05	0.000212934	0	0.00546216	0.000139593
Tetracladium	6.10715e-05	1.47822e-05	1.429e-05	1.49009e-05	2.92582e-05	2.72342e-05	7.58875e-05	2.93419e-05	0	1.37406e-05	4.35951e-05	0.00022419	0.000139696	0.00033588	0.000132112	5.96668e-05	0.00176946	0.000647731	0.00539565	0.000786377	0	0.000390195	4.21473e-05	0.000256583	0	9.65158e-05	0	1.38464e-05	0	6.83686e-05	0	0	2.84487e-05	1.38359e-05	5.55401e-05	0.000644496	0	0.000142428	2.78676e-05	4.19e-05	1.53718e-05	0	3.1292e-05	0	0	0	0	0	0
Phialophora	3.05357e-05	2.95644e-05	0.00015719	0.000238415	2.92582e-05	0.000136171	4.55325e-05	0.000528154	9.68523e-05	0	0.000145317	3.20272e-05	0.000195574	0.000447841	0.000234866	5.96668e-05	0	0.000161933	0.000239452	5.71911e-05	9.93881e-05	0.000515615	4.21473e-05	0.000192437	0.000415037	5.51519e-05	5.47031e-05	4.15392e-05	0.000136973	2.73474e-05	0.00215926	0.000373775	0.000298711	5.53434e-05	0.00013885	0.000315087	0.00067177	0.000726382	0.000125404	0.000530734	0.00213669	0.000352762	0.00015646	0.000680251	0.000171757	0.000714851	0.000198692	0.00157796	0.000325718
Cyberlindnera	6.10715e-05	0	1.429e-05	7.45045e-05	5.85163e-05	0.000177022	4.55325e-05	0.000704205	0	0.000164887	0	8.00679e-05	2.79392e-05	5.59801e-05	2.93582e-05	0.0002685	5.66227e-05	0	0	0.00025736	1.41983e-05	6.96777e-05	0	6.41457e-05	7.98148e-05	0.000399851	0.000218812	2.76928e-05	0	9.5716e-05	0.00520437	0.000609115	1.42243e-05	0	4.16551e-05	5.72885e-05	0	0	1.39338e-05	8.38001e-05	1.53718e-05	0.000160346	0.000704071	4.74593e-05	0	0.000121677	0.000275112	0.000637252	0
Umbelopsis	0.000106875	7.39109e-05	7.145e-05	0.000104306	0.000424243	2.72342e-05	1.51775e-05	2.93419e-05	0.000207541	2.74812e-05	0	0	2.79392e-05	0	0	2.98334e-05	0	0.000534378	0.000207525	1.42978e-05	0	0	0.000280982	4.81093e-05	0	0.000151668	0.000123082	0.00105233	8.21839e-05	0.00010939	0.000235304	0.000346088	0.000156468	0	8.33102e-05	1.43221e-05	6.99761e-05	0	0.000473749	4.19e-05	0.000153718	0.000128277	0.000187752	0	0.00519955	4.56288e-05	1.5284e-05	0.000121381	0
Paraphaeosphaeria	0.000610715	0.00067998	0.00130039	0.000238415	0.000775341	0.000953198	0.00292926	0.000132038	0.000511934	0.00516647	0.00165662	0.000384326	0.000866115	0.00173538	0.000587165	0.000179	0.000750251	0.000501992	0.000399087	0.000529017	0.000653121	0.000348388	0.000210736	0.000144328	0.000399074	0.000124092	0.000328219	2.76928e-05	0.000602682	6.83686e-05	0.00388943	0.00341935	0.000256038	0.00218606	0.000485976	0.000544241	0.00256112	0.000299098	0.00108684	8.38001e-05	0.000338181	0.00065742	0.000469381	9.49187e-05	0.000515271	0.000334611	0.000443235	0.000379317	0
Fellomyces	6.10715e-05	2.95644e-05	0.00024293	0.000149009	7.31454e-05	4.08513e-05	9.1065e-05	0.000117367	1.3836e-05	4.12218e-05	0.00042142	0.000288244	0.000293362	0.00030789	0.000308261	5.96668e-05	0	0.000242899	4.78904e-05	0	4.25949e-05	5.57421e-05	0	0	0.000367148	0	0	0	0.000109579	4.10212e-05	0.00019378	2.7687e-05	1.42243e-05	5.53434e-05	0.00011108	0.000128899	0.000307895	7.12139e-05	4.18014e-05	2.79334e-05	0.000707105	0.00468211	0.000203398	0.000110738	0.000437199	0	0	0.000121381	0.000604904
Geopora	0	0	0	0	0	0	0	0	0	0	0	0	0	0	0	0	0	0	0.00506042	0	0	0	0	0	0	0	0	0	0	0	0	0	0	0	0	0	0	0	0	0	0	0	0	0	0	0	0	0	1.55104e-05
Scolecobasidium	0.00296197	0.00130083	0.00058589	0.00032782	0.00095089	0.000626387	0.00119902	0.000366773	0.00105154	0.000714511	0.000159849	0.000144122	0.00111757	0.000881686	0.00108625	0.00120825	0	0	0.00031927	0	0.000127785	0.000139355	0.000491718	0.000272619	0.00108548	8.27278e-05	6.83789e-05	0.000235389	0.000383525	5.46949e-05	0.000276828	0.000221496	0.000711217	0.000415076	0.000180505	0.000587207	0.00153947	0.00142428	0.000571285	0.00191343	0.000630246	0.000577247	0.000406797	0.000601152	0.000374742	0.000228144	1.5284e-05	0.000212417	0.000387759
Mycena	3.05357e-05	0.000192168	2.858e-05	0.00101326	4.38872e-05	0.000108937	3.0355e-05	4.40128e-05	8.30163e-05	1.37406e-05	0.000188912	0.000112095	0.000628632	4.19851e-05	5.87165e-05	0.000208834	0.00108999	0.000113353	0	0.00134399	8.51898e-05	0.00012542	5.61964e-05	9.62186e-05	0	1.3788e-05	1.36758e-05	0	4.1092e-05	4.10212e-05	0	1.38435e-05	0	0	1.3885e-05	0.000802039	4.19856e-05	2.84856e-05	1.39338e-05	4.19e-05	0	0	4.69381e-05	0	0	0	0	0	0
Lasiodiplodia	0.00196956	0.000694763	0.00090027	0.00114737	0.00133125	0.000381279	0.00476574	0.00063085	0.00159114	0.000893139	0.000653927	0.00461191	0.000782298	0.00030789	0.000484411	0.000924835	0	0.00166791	0.000462941	0	0.000511139	0.00161652	0.00122227	0.000689567	0.00231463	0.000510155	0.000506004	0.00336467	0.000575287	0.00047858	0.00163329	0.00110748	0.00483628	0.000760972	0.0028742	0.00260663	0.00365275	0.00489952	0.00377606	0.00157823	0.00156793	0.000994147	0.000140814	0.000759349	0.00084317	0.000441078	0.000932323	0.00151727	0.000387759
Agaricus	0	0.000147822	0	5.96036e-05	1.46291e-05	2.72342e-05	4.55325e-05	2.93419e-05	1.3836e-05	0.000618327	0	0	0	4.19851e-05	0	0	0	0	0	0	0	2.78711e-05	4.21473e-05	8.01822e-05	0	0	0	0	0	0	1.38414e-05	0	0	0	4.16551e-05	2.86443e-05	0	0	0	0	0	0	0	0	9.36856e-05	0.00489749	0.000458519	0	0
Sonoraphlyctis	0	0	1.429e-05	0	0	0	0	0	0.000110688	0	2.90634e-05	0	6.9848e-05	0	0	1.49167e-05	8.49341e-05	0	0	0	0	6.96777e-05	0.000112393	0	0	0	0	0.0048047	0	1.36737e-05	5.53656e-05	0.000179966	0	2.76717e-05	0	2.86443e-05	1.39952e-05	1.42428e-05	1.39338e-05	0.000153633	0.000184462	0	0	4.74593e-05	0	0	0	0	0
Sagenomella	0.000122143	2.95644e-05	4.287e-05	5.96036e-05	4.38872e-05	5.44685e-05	0.00018213	0.000117367	8.30163e-05	1.37406e-05	0.000232507	0.000384326	0.000586723	0.00013995	0.00016147	0.000149167	0.000467138	0.00453412	0.00328848	0.000314551	0.000482742	0.000473808	0.00092724	0.000144328	0.000431	0.000289547	0.000341894	0.000207696	0.00015067	9.5716e-05	0.000262987	0.000913672	0.000128019	0.00016603	0.000249931	0.00289307	0.000405861	0.000441526	0.000167205	0.000223467	0.000230578	0.00020845	0.000219044	0.00101247	0.000140528	0.000410659	0	0.000440007	0.000977153
Lanatonectria	0.000381697	0.000295644	0.00018577	4.47027e-05	8.77745e-05	0.000313194	0.000197308	0.000102697	0.00013836	4.12218e-05	0.000145317	3.20272e-05	0.000153666	0.00155345	0.000249545	0.00031325	0	0.000340059	0.00174002	0.000314551	0.00116426	0.000947616	0.000210736	0.000481093	0.000542741	2.75759e-05	1.36758e-05	5.53856e-05	4.1092e-05	0.000273474	0.00430468	0.000138435	0.00055475	9.6851e-05	0.000208275	0.00203374	0.000713756	0.0022646	0.000961431	0.00173187	0.000983798	0.000705524	0.000751009	0.000427134	0.00106177	0.00038024	9.17039e-05	0.00150209	0.000511842
Edenia	0	0	5.716e-05	0	0	0	1.51775e-05	0	0	0	1.45317e-05	0	0	2.799e-05	0	0	0.000113245	4.85798e-05	0.000223489	0	0	0.000111484	0	0	0	0	0	0	1.36973e-05	0	0	0	0	0	0	0	0	2.84856e-05	0	0	7.68592e-05	3.20693e-05	0	0	0.00204547	0	9.17039e-05	0	0
Gymnopilus	0	0	0	4.47027e-05	0.000394985	2.72342e-05	0	0.00016138	0.000179869	1.37406e-05	0.000130785	4.80407e-05	0.000991842	0.000727741	0	8.95001e-05	0	4.85798e-05	0	0	0.000269768	2.78711e-05	0.000280982	3.20729e-05	0	0.00124092	9.57304e-05	0.000110771	0.00015067	0.000341843	0	0.00177197	1.42243e-05	0	0.00319356	1.43221e-05	0.000377871	0.00145276	0.00029261	6.98334e-05	0.000107603	0.000320693	6.25841e-05	0.00420806	0.00106177	0.00036503	0.00103931	0.00022759	0
Saccharomyces	0	0	0	0	0	0	0	0	0	0	0	0	0	1.3995e-05	0	2.98334e-05	8.49341e-05	0.000534378	0.00164424	1.42978e-05	0	0	0	0	0.00180382	0	0	0	0	0	0	0	0	0	0	1.43221e-05	0	0	0	0	4.61155e-05	1.60346e-05	0.000422443	0.000300576	0.000421585	0.000197725	0.000534939	0.000546216	0.00190778
Hygrophorus	0	0	0	0	0	0	0	0	0	0	0	0	0	0	0	0	0	0.00417787	0.0033204	0	0	0	0	0	0.00106952	0	0	0	0	0	0	0	0	0	0	0	0	0	0	0	0.000138347	0.000144312	0.000328567	0.000474593	3.12285e-05	0.000577964	0.000412667	0.000273108	0.00122532
Roussoella	0.000167947	0.000118257	0.0002858	0.000834451	5.85163e-05	0.000272342	0.000318728	0.000513483	8.30163e-05	5.49624e-05	8.71903e-05	3.20272e-05	8.38176e-05	1.3995e-05	5.87165e-05	0	7.07784e-05	0.000501992	9.57809e-05	2.85955e-05	0.00352118	0.0025084	5.61964e-05	6.41457e-05	0	1.3788e-05	0	0	0	1.36737e-05	2.76828e-05	1.38435e-05	0.000113795	0	0	0.00047263	0.00334486	0.00417314	1.39338e-05	6.98334e-05	0	0	3.1292e-05	0	0	0	0.000168124	0	1.55104e-05
Torula	0	7.39109e-05	0.00040012	5.96036e-05	0	6.80856e-05	0.00012142	0.00032276	0	4.12218e-05	1.45317e-05	0	0.000628632	0.00016794	0	0	8.49341e-05	0.000178126	0	5.71911e-05	0	1.39355e-05	0	3.20729e-05	0	4.13639e-05	1.36758e-05	0	1.36973e-05	0	0.000249145	0	0	0	1.3885e-05	5.72885e-05	0.000111962	5.69711e-05	0	1.39667e-05	0	0	0	4.74593e-05	0	0	0	0	0.000697967
Calyptella	0	0	0	0	0	0	0	0	0	0	0	0	0	0	0	0	0	0	0.00407069	0	0	0	0	0	0	0	0	0	0	0	0	0	0	0	0	0	0	0	0	0	0	0	0	0	0	0	0	0	0
Agrocybe	0	0	0	0	0	0	0	0	0	0	0	0.00403542	0.000391149	0	0	0	0	8.09664e-05	9.57809e-05	0	0	0	0	0	0	0	0.00035557	0	0	0	0	0	0	0	0	0	0	0	0	0	0	0	0	0	0	0	0	0	0
Marasmiellus	0	0	0.00144329	1.49009e-05	0	0	0	0	0	0	0	0	0	8.39701e-05	0	0	0	0	0.000207525	0	8.51898e-05	0	2.80982e-05	0	0	0	0.000109406	0	0	0	0	0	0	0	0	0	0	4.27283e-05	0.00178352	1.39667e-05	0.000338181	0	0	0.000411314	9.36856e-05	0	0	3.03453e-05	0
Failobasidiaceae_family_Cryptococcus	0.000351161	0.000739109	0.00037154	0.000223514	0.000819228	0.000204257	0.00171506	0.000645521	0.000221377	0.000302293	0.000188912	0.000576489	0.000726419	0.00100764	0.000411015	0.000149167	0.00189686	0.00150598	0.00397491	0.00175863	0.000227173	0.00171407	0.000477669	0.00044902	0.000941815	9.65158e-05	6.83789e-05	1.38464e-05	0.000136973	0.000437559	5.53656e-05	0.000706019	2.84487e-05	8.30151e-05	0.00013885	0.00138925	8.39713e-05	0.00173762	0.000222941	0.000474867	0.000276693	0.00261365	0.000140814	0.000632791	0.0003279	0.000288982	7.64199e-05	0.00091036	0.000915112
Venturia	0	0	0	0	0	0	0.000106243	0	0	0	0	0	0	0	0	0	0	0.00014574	0.00389509	0	0	0	0	0	0	0	0	0	0	0	0	0	0	0	0	2.86443e-05	4.19856e-05	7.12139e-05	0	0	4.61155e-05	0	0	0	0	0	0	0	0
Hannaella	4.58036e-05	0.000118257	0.00010003	0	0.00111181	0	7.58875e-05	4.40128e-05	4.15081e-05	5.49624e-05	0.000145317	0.000288244	0.000237483	0.00013995	7.33956e-05	7.45835e-05	0.000495449	0.0021699	0.000542758	0.000300253	4.25949e-05	0.000334453	0	0.000144328	0.00379919	0	0	0	4.1092e-05	5.46949e-05	0.000415242	4.15305e-05	1.42243e-05	1.38359e-05	4.16551e-05	0.000315087	2.79904e-05	5.69711e-05	1.39338e-05	0.000768167	9.22311e-05	0.00296641	0.00023469	0.000316396	0.000421585	0.000441078	9.17039e-05	0.000591734	0.000294697
Basidiobolus	0	0	0	0	0	0	0	0	0	0	0	0	0	0	0.00278903	0.00377392	0	0	0	0	0	0	0	0.000769749	0.000127704	0	0	0	0	0	0	0	0	0	0	0	0	0	0	0	0	0	0	0	0	0	0	0	0
Zasmidium	0	0	2.858e-05	1.49009e-05	0	0	0	0	0	0	0	0	2.79392e-05	1.3995e-05	2.93582e-05	0	0	0.00374065	0.00276168	0.000200169	1.41983e-05	0	0	0	0.000351185	0	0	0	1.36973e-05	0	0	0	0	0	0	0	0	0	0	0	0.00113752	0.000128277	4.69381e-05	0.000363855	7.80713e-05	4.56288e-05	0.000213976	0.000318626	0.000775518
Cladophialophora	0.000610715	0.000354772	0.0005716	0.00117717	0.000365727	0.00117107	0.000576745	0.000748217	0.000553442	0.000398478	0.000203444	0.000176149	0.000628632	0.00125955	0.000616523	0.0002685	0.000665317	6.47731e-05	0	0.000972248	0.000638923	0.000696777	0.000505767	0.000304692	0.00059063	0.00013788	0.000601734	0.000124617	0.000328736	0.00036919	0.000318352	8.30611e-05	0.000156468	0.000207538	0.000208275	0.000458308	0.00118959	0.000498497	0.000390146	0.000935767	0.000184462	0.000352762	0.000469381	0.000300576	0.000921242	0	0.000244544	0	0
Nigrospora	0.00112982	0.000739109	2.858e-05	0.00122187	0.00229677	4.08513e-05	0.000652633	0.00132038	0.000249049	0.000302293	0.00110441	0.000608516	0.000293362	0.000125955	0.00102754	0.000417667	0	0.000485798	0.00041505	0.000271658	0.000411751	0.00172801	0.000168589	6.41457e-05	0.000127704	0.00020682	0.000683789	0.000166157	0	0.000164085	0.000802802	4.15305e-05	0.000440955	0.000124523	0.000485976	1.43221e-05	0.0014695	0.00175186	0.000668822	0.0023464	4.61155e-05	0.000256554	0.000219044	0.000110738	3.12285e-05	3.04192e-05	0	7.58633e-05	0.000325718
Minimedusa	0.000122143	0.000221733	2.858e-05	0	0.000117033	0	0.000516035	1.46709e-05	2.76721e-05	4.12218e-05	1.45317e-05	0.000336285	8.38176e-05	0.000125955	0.000190828	0.000104417	0.000184024	4.85798e-05	0	4.28933e-05	4.25949e-05	0.000459873	1.40491e-05	0	0	0.00365381	0	0	4.1092e-05	0.00306291	0.000249145	0	0	0	2.77701e-05	0.000830684	2.79904e-05	2.84856e-05	2.78676e-05	1.39667e-05	0	9.62078e-05	0	0	0.000640185	3.04192e-05	0.000382099	0.000713115	0
Glaciozyma	3.05357e-05	0	1.429e-05	0	1.46291e-05	1.36171e-05	3.0355e-05	0	4.15081e-05	5.49624e-05	4.35951e-05	0.000432367	0.000293362	0.000377865	0.000190828	0.000119334	0.00172699	0	0	0.000929355	0	0.00365111	2.80982e-05	4.81093e-05	0	4.13639e-05	0	0	5.47893e-05	1.36737e-05	0	1.38435e-05	0	0	5.55401e-05	0.000186188	0	0.000156671	4.18014e-05	2.79334e-05	0	0	0	0	0	0	0	0	0
Clavulina	0	0	0	0	0	0	0	0	0	0	0	0	0	0	0	0	0	0.0036273	0.00124515	0	0	0	0	0	0.00027137	0	0	0	0	0	0	0	0	0	0	0	0	0	0	0	6.14874e-05	4.81039e-05	9.38761e-05	0.000205657	6.24571e-05	6.08384e-05	0.000168124	0.00068277	0.000387759
Pseudocercospora	0.000122143	1.47822e-05	4.287e-05	8.94055e-05	0.00078997	1.36171e-05	0	0.000102697	4.15081e-05	0	7.26586e-05	8.00679e-05	0	0.00019593	5.87165e-05	0.000372917	0	0.00325485	0.00212314	0.000228764	1.41983e-05	2.78711e-05	0	0	0.000766222	1.3788e-05	0	0	2.73946e-05	0	0	0	1.42243e-05	0.000152194	0	0	0.000111962	2.84856e-05	0	9.77667e-05	0.000906939	6.41385e-05	0.00031292	3.16396e-05	1.56143e-05	0.000243353	0.000275112	0.000151727	0.000946132
Dactylellina	0	0	1.429e-05	2.98018e-05	0	0	0	4.40128e-05	0	0	0.000159849	0	0.000251453	0.000503821	0	0	0	0	0	0	0	0	0	0	0	0	0	0	2.73946e-05	0	8.30484e-05	9.69046e-05	0	0	0	0	1.39952e-05	0	0.000195073	0	0.000184462	0.000112242	0	0.00071189	0.000171757	0	7.64199e-05	0.00350489	0.00041878
Pichia	0.000122143	8.86931e-05	1.429e-05	2.98018e-05	8.77745e-05	5.44685e-05	9.1065e-05	2.93419e-05	8.30163e-05	0.000137406	0.000523142	0.00107291	0.000740389	0.000615781	0.000411015	0.00022375	0.0034823	4.85798e-05	0	0.00162995	0.000113586	0.00165833	0.000126442	0.00044902	6.38519e-05	0.000165456	2.73515e-05	0	8.21839e-05	4.10212e-05	1.38414e-05	0.000124592	4.2673e-05	4.15076e-05	0.00011108	0.000572885	6.99761e-05	0.000284856	2.78676e-05	4.19e-05	0	0	0	0	0	0	0	0	0
Piloderma	0	0	0	0	0	0	0	0	0	0	0	0	0	0	0	0	0	0.00346536	0.00338426	0	0	0	0	0	0.000239444	0	0	0	0	0	0	0	0	0	0	0	0	0	0	0	9.22311e-05	6.41385e-05	0.000406797	9.49187e-05	0	0	4.58519e-05	0.000121381	0.000946132
Thozetella	0	4.43466e-05	0.00024293	0.000149009	0.000277953	0.00147065	0	0	0.00013836	2.74812e-05	0	0	0	0	0	0	0	0	0	0	0	4.18066e-05	0	0	0.000143667	0	0	0	0	0	0	0	0	0	0	4.29664e-05	0	8.54567e-05	0	5.58667e-05	0	0	0	0	0	6.08384e-05	0	0	0
Alternaria	1.52679e-05	0	0	1.49009e-05	0	5.44685e-05	0.000136598	0	0	4.12218e-05	0	1.60136e-05	1.39696e-05	2.799e-05	0.000895426	0.000328167	0.000113245	0.000501992	0.00189965	0.000200169	0	0	4.21473e-05	1.60364e-05	0.000415037	0	0	0	0	0	0	0	0	0	0	0	0	4.27283e-05	2.78676e-05	1.39667e-05	6.14874e-05	3.20693e-05	0.00103264	1.58198e-05	0.000124914	0	0.000168124	0	0
Kernia	3.05357e-05	5.91287e-05	1.429e-05	0.000238415	1.46291e-05	0.000258725	0	0	1.3836e-05	0	0	8.00679e-05	0	0	0	0	0	0.000793471	0.00031927	0.000200169	0.000312362	8.36132e-05	1.40491e-05	0.00331954	0	8.27278e-05	0	0.000235389	0.000109579	9.5716e-05	0.000858167	5.53741e-05	0.000199141	6.91793e-05	2.77701e-05	0.000143221	0.00034988	0.00240703	0.000418014	6.98334e-05	0	0	0	0	0	0	0	0	0
Chloridium	0.000305357	0.000783456	0.00024293	7.45045e-05	0.000117033	0.000408513	0.00174541	0.000102697	1.3836e-05	0.000741993	0.000305166	0.000800679	0.000181605	0.000181935	0.0016881	0.00128284	0	0.00330343	0	0.000214466	0.000326561	0.000376259	0.000449571	0.000112255	0	2.75759e-05	0	0	1.36973e-05	2.73474e-05	0	0	0	0	1.3885e-05	0.00118874	8.39713e-05	0.000156671	0.000167205	0.000139667	0	0	0	0	0	0	0	0	0
Acrostalagmus	0	0	0	0.000104306	1.46291e-05	0	7.58875e-05	0	0	0	0	0.000240204	0	0	0	0	0	0	0	0	9.93881e-05	0	0	0	0	0	2.73515e-05	0	0	0	5.53656e-05	6.92176e-05	0	0	0	0	0	0	0	0	3.07437e-05	3.20693e-05	0	0	0	0.000106467	0	0	0
Wickerhamomyces	3.05357e-05	0	0	0	0	0	0	0	0	0	1.45317e-05	0	1.39696e-05	0	0	0	0	9.71597e-05	0.000143671	1.42978e-05	0	1.39355e-05	0	1.60364e-05	7.98148e-05	1.3788e-05	0	0	0	2.73474e-05	4.15242e-05	0	0	0	1.3885e-05	0	1.39952e-05	0	0	0	7.68592e-05	1.60346e-05	0	3.16396e-05	0	0	0	3.03453e-05	0
Sporothrix	0.000259554	4.43466e-05	5.716e-05	5.96036e-05	1.46291e-05	5.44685e-05	0.000516035	0.000117367	9.68523e-05	0	0.000174381	4.80407e-05	9.77872e-05	2.799e-05	0.000176149	0.00013425	0	6.47731e-05	0	1.42978e-05	0.00305263	0.00185343	2.80982e-05	1.60364e-05	0	1.3788e-05	0	5.53856e-05	1.36973e-05	0.000232453	0.000359877	0.000179966	0	4.15076e-05	0.000319356	0.0016184	0.00197333	0.00319038	8.36027e-05	0.000153633	0.000107603	6.41385e-05	0.00015646	0	0.000202985	0	0	0	0
Corynascus	0.00129777	0.000901713	0.00105746	0.000715244	0.000819228	0.00080341	0.00130527	0.0017165	0.00125908	0.00111299	0.000217976	0.000368312	0.000544814	0.000587791	0.000792672	0.000641418	0.000438826	6.47731e-05	0.000207525	0.000614804	0.00177479	0.00117058	0.00317509	0.00158761	0.000574667	0.000689398	0.000957304	0.00034616	0.000945115	0.000615317	0.000332194	0.000387618	0.00098148	0.00040124	0.000430436	0.00146086	0.0014555	0.00111094	0.00151878	0.00182963	7.68592e-05	6.41385e-05	0	0.000221477	0	0.000136886	3.0568e-05	9.1036e-05	1.55104e-05
Scedosporium	1.52679e-05	5.91287e-05	0.00110033	5.96036e-05	0	0.000122554	1.51775e-05	4.40128e-05	6.91802e-05	4.12218e-05	0.000145317	1.60136e-05	8.38176e-05	0.000433846	0.000308261	5.96668e-05	0.000184024	0.00126308	0.001309	8.57866e-05	0.000312362	0.000209033	0.000590062	0.00044902	0.000383111	0.000248183	0.000601734	0.00123233	0.000123276	0.00121696	0.000456766	0.000290714	0.00100993	1.38359e-05	0.000749792	0.000114577	0.000489832	0.000384555	0.000459815	0.000656434	0.000215206	0	0.000219044	0.000237297	3.12285e-05	4.56288e-05	0	0.000197245	0.0017992
Monilochaetes	0.000122143	4.43466e-05	0	4.47027e-05	0.000117033	0	7.58875e-05	7.33547e-05	9.68523e-05	9.61842e-05	0.000188912	0.000656557	0.000419088	0.0002799	0.000146791	0.00155134	0.00157128	0	0	0.00310262	0.000227173	0.000571357	0	0.000240547	0	5.51519e-05	2.73515e-05	0	2.73946e-05	2.73474e-05	0	2.7687e-05	4.2673e-05	1.38359e-05	1.3885e-05	0.000587207	5.59809e-05	0.000156671	2.78676e-05	5.58667e-05	0	0	0	0	0	0	0	0	0
Stephanonectria	0.000381697	0.000635634	0.00048586	4.47027e-05	1.46291e-05	0.00019064	0.000516035	7.33547e-05	0	4.12218e-05	0.000188912	4.80407e-05	1.39696e-05	0	0.000455053	8.95001e-05	0	4.85798e-05	0	0	0	0	2.80982e-05	0	0.000670445	1.3788e-05	0	1.38464e-05	8.21839e-05	0.000136737	5.53656e-05	9.69046e-05	0.000113795	5.53434e-05	0.000347126	7.16107e-05	6.99761e-05	0.000384555	0.000222941	1.39667e-05	0.000353552	0.000577247	0.000125168	0	7.80713e-05	7.60479e-05	0.000168124	0.000197245	0
Cancellidium	0	0	0	0	0	0	0	8.80256e-05	0	0	0	0	0.00296156	0	0	0	0	0	0	0	0	0	0	0	0	0	0	0	0	0	0	0	0	0	0	0	0	0	0	0	0	0	0	0	0	0	0	0	0
Preussia	0	4.43466e-05	2.858e-05	0	1.46291e-05	2.72342e-05	0.00012142	5.86837e-05	0	9.61842e-05	0.000116254	0.000416353	0.000181605	0.00013995	0.00016147	0	0.000481293	0.00147359	0.00293728	0.000743484	1.41983e-05	5.57421e-05	1.40491e-05	1.60364e-05	0.000925852	1.3788e-05	1.36758e-05	0	4.1092e-05	6.83686e-05	0	1.38435e-05	1.42243e-05	0	0	0.000329409	2.79904e-05	0.000170913	1.39338e-05	0	0.000184462	3.20693e-05	0.000109522	0.000965007	3.12285e-05	0.000136886	0.000443235	0.000424835	0.000651435
Mrakiella	6.10715e-05	4.43466e-05	4.287e-05	1.49009e-05	1.46291e-05	4.08513e-05	7.58875e-05	2.93419e-05	9.68523e-05	0.000370996	0.000247039	0.000800679	0.000768328	0.000587791	0.000366978	2.98334e-05	0.00260465	1.61933e-05	0	0.000872164	0.000184578	0.00292646	2.80982e-05	0.000352802	0	9.65158e-05	2.73515e-05	4.15392e-05	0.000178065	2.73474e-05	0	5.53741e-05	4.2673e-05	0	0.00013885	0.000759073	6.99761e-05	0.000156671	0.000125404	5.58667e-05	0	0	0	0	0	0	0	0	0.000232656
Davidiella	1.52679e-05	1.47822e-05	0	1.49009e-05	1.46291e-05	0	4.55325e-05	1.46709e-05	4.15081e-05	9.61842e-05	2.90634e-05	0.000144122	6.9848e-05	0.000125955	0.000190828	7.45835e-05	0.000651161	0.000647731	0.00287343	0.000943653	2.83966e-05	0.000348388	0	0.000128291	0	2.75759e-05	0	0	2.73946e-05	1.36737e-05	0	0	0	1.38359e-05	1.3885e-05	0.000243476	5.59809e-05	0.000128185	2.78676e-05	2.79334e-05	0	0.000224485	0	0.000110738	1.56143e-05	3.04192e-05	0	1.51727e-05	0.000511842
Gongronella	0	0	0	0	1.46291e-05	0	1.51775e-05	0	0	0	0	0	0	1.3995e-05	0	0.000208834	0	1.61933e-05	0	2.85955e-05	0	0	0	0	0	0	0	0	0	0	0	0	0	0	0	2.86443e-05	0	0	0	0	1.53718e-05	3.20693e-05	4.69381e-05	0	1.56143e-05	1.52096e-05	0	1.51727e-05	0
Nectria	6.10715e-05	7.39109e-05	4.287e-05	0.000432126	5.85163e-05	2.72342e-05	0.000106243	0	0	1.37406e-05	0.000915498	0.000480407	0.000195574	0.000349875	0.000601844	0.000238667	0	9.71597e-05	0	0	0	0	7.02454e-05	3.20729e-05	0.000239444	1.3788e-05	1.36758e-05	9.69247e-05	4.1092e-05	9.5716e-05	0.000138414	0	0	5.53434e-05	0.000416551	0	0.000699761	5.69711e-05	0	0	0.000261321	0.00277399	0.000125168	0	0.000624571	0	0	0.000925533	0
Cladorrhinum	0.000320625	0.000177386	2.858e-05	2.98018e-05	0.000994777	5.44685e-05	0.000273195	5.86837e-05	0.000124524	0.000109925	0.000188912	0.000816693	0.000572754	0.00128754	0.000572485	0	0.00276036	8.09664e-05	7.98174e-05	0.00221615	0.00017038	0.000822197	0.000112393	0.000192437	0	0.000151668	1.36758e-05	1.38464e-05	6.84866e-05	0.000382864	2.76828e-05	4.15305e-05	2.84487e-05	2.76717e-05	6.94252e-05	0.00237747	0	0.00103972	8.36027e-05	6.98334e-05	0	0	0	0	0	4.56288e-05	0	0	0
Periconia	0.000229018	0.000369555	0.00058589	0.000134108	0.000146291	0.000748941	0.000698165	0.000220064	0.000276721	0.000370996	0.000334229	0.00022419	0.000181605	0.00019593	0.00016147	0.000611584	0.000679473	0.000178126	3.1927e-05	0.000457528	0.00195936	0.00107304	5.61964e-05	0.000128291	0.000510815	2.75759e-05	0	0	0	1.36737e-05	8.30484e-05	4.15305e-05	2.84487e-05	6.91793e-05	0.000152735	0.00273553	0.00099366	0.00128185	0.000209007	0.000181567	3.07437e-05	0.000112242	0	0	0.000171757	3.04192e-05	0	0.000151727	0
Phialocephala	0.00152679	0.00146344	0.00060018	0.00272687	0.000833858	0.000122554	6.071e-05	0.00105631	0.000152196	1.37406e-05	0.000494078	0.000864733	0.000474966	1.3995e-05	0	0	0	0.000210513	0.000143671	8.57866e-05	9.93881e-05	5.57421e-05	0.000547914	0.000416947	0	0	1.36758e-05	0.000124617	0.00165738	4.10212e-05	2.76828e-05	0	0.00136554	0.000802479	1.3885e-05	4.29664e-05	0.000195933	0	1.39338e-05	9.77667e-05	1.53718e-05	1.60346e-05	0	0.000158198	1.56143e-05	0	0	0	0
Thielavia	0.000351161	0.00033999	0.0004287	0.000134108	0.000351098	9.53198e-05	0.00048568	0.00079223	0.000470425	0.00129162	0.000203444	3.20272e-05	0.000209544	2.799e-05	0.000513769	0.00022375	0	0	0	0	0.000795104	0.00268956	0.000828896	0.000208474	9.57778e-05	1.3788e-05	0	0	2.73946e-05	0	0	0	0	0	1.3885e-05	0.000730429	0.00124557	0.00141004	0.000376212	0.0005866	0	0	0	0	0	0	0	0	0
Tetraplosphaeria	0.000839733	0.00169995	0.00152903	0.0016838	0.00112644	0.00113022	0.00122938	0.0025234	0.000760982	0.0017588	0.000523142	0.000496421	0.000405118	0.000181935	0.000572485	0.000193917	0.00019818	1.61933e-05	0	0	0.000553733	0.00132388	0	0	0.000223482	6.89398e-05	0	2.76928e-05	8.21839e-05	0	0.000207621	4.15305e-05	9.95704e-05	6.91793e-05	0.00011108	0.000171866	0.00155347	0.00136731	0.000418014	0.000698334	0.000184462	0.00155536	7.82301e-05	0.000490413	0.000390357	0.000197725	0.00145198	0.00022759	0.00117879
Microdochium	3.05357e-05	4.43466e-05	1.429e-05	0.000178811	0.000994777	5.44685e-05	0.000106243	0.000381444	0.000166033	1.37406e-05	0.000101722	0.000736625	9.77872e-05	8.39701e-05	0.000220187	1.49167e-05	0.000452982	0.000971597	0.00181984	0.000142978	0.00105067	0.000641035	0	0.000160364	0.000415037	8.27278e-05	0	1.38464e-05	0	1.36737e-05	0	0	2.84487e-05	0	0	0.000300765	0.000209928	0.00061244	1.39338e-05	4.19e-05	1.53718e-05	1.60346e-05	0	0	0.00126476	7.60479e-05	0	0.000197245	0.000294697
Helicoma	0.000855001	0.000413901	0.00147187	0.00137088	0.00261861	0.00152512	0.00130527	0.00189255	0.000401245	0.00144276	0.000741117	0.00084872	0.000223514	0.000153945	0.000366978	0.000492251	0	4.85798e-05	7.98174e-05	0.000114382	0.00117846	0.00179768	0.00109583	8.01822e-05	0.000814111	0.0015994	0.000629086	0	0.000123276	4.10212e-05	0.000844326	0.00148126	0	0.0011207	0.00013885	0.00186188	0.00166543	0.00149549	0	0.000349167	0.000138347	0.00123467	0	0	6.24571e-05	0	0	0	0
Metarhizium	0.000274822	0.000206951	1.429e-05	0.000208613	0.00032184	4.08513e-05	0.00018213	7.33547e-05	0.000608786	0.000288553	0.000450483	0.000208177	0.000195574	2.799e-05	0.000352299	0.000358001	0	0.000599151	0.00102166	8.57866e-05	0.000255569	8.36132e-05	0.000112393	0.000176401	0	1.3788e-05	0	2.76928e-05	4.1092e-05	4.10212e-05	1.38414e-05	0	8.53461e-05	4.15076e-05	2.77701e-05	0.000916617	0.000153947	0	9.75365e-05	0.00261177	1.53718e-05	0	0	0.000142378	0	0	0	1.51727e-05	0.000201635
Hirsutella	0.00253447	0.000177386	2.858e-05	5.96036e-05	0.00124347	4.08513e-05	0.000576745	7.33547e-05	8.30163e-05	0	4.35951e-05	0	0	6.99751e-05	2.93582e-05	0	0	0.000161933	0	8.57866e-05	0	6.96777e-05	0	0	0.000446963	0	6.83789e-05	0.000124617	4.1092e-05	0	1.38414e-05	4.15305e-05	1.42243e-05	0.000249045	0.00016662	5.72885e-05	0.000363876	0.000128185	1.39338e-05	1.39667e-05	0.000461155	0.00133087	7.82301e-05	4.74593e-05	0.000749485	0	0.000137556	3.03453e-05	0
Cephalosporium	0	7.39109e-05	1.429e-05	0.000357622	2.92582e-05	0	0.000151775	0.000557495	0	0	0.000319698	0.000528448	0.00036321	0.00016794	0.000117433	0	0	0.000696311	6.38539e-05	1.42978e-05	0	2.78711e-05	0	1.60364e-05	0.000223482	0.000110304	1.36758e-05	5.53856e-05	6.84866e-05	0.000150411	0.000442925	4.15305e-05	1.42243e-05	2.76717e-05	2.77701e-05	0	0	0	1.39338e-05	1.39667e-05	0.000153718	0	0	0.00074353	0	4.56288e-05	0	7.58633e-05	1.55104e-05
Sarocladium	0.000229018	0.000576505	0.00011432	0.000178811	0.000424243	0.000299577	0.000956183	0.000484141	2.76721e-05	0.000151147	0.000465015	0.00067257	0.000684511	0.000349875	0.000117433	0.000119334	0.00117492	0.000485798	0.000814137	0.00247351	0.000184578	0.00122633	0.000421473	0.00094615	0.000351185	8.27278e-05	4.10273e-05	5.53856e-05	0.000123276	2.73474e-05	0.000761277	0.000207653	4.2673e-05	0.000262881	0.000263816	0.000701785	0.000391866	0.000484255	0.000459815	0.000405034	0.000476527	0.000400866	0.000328567	0.000680251	0.000171757	0.000441078	0.00022926	0.00215452	0.00043429
Lactarius	0	0	0	0	0	0	0	0	0	0	0	0	0	0	0	0	0	0.00176507	0.00239452	0	0	0	0	0	0.000111741	0	0	0	0	0	0	0	0	0	0	0	0	0	0	0	0.000107603	4.81039e-05	0.00015646	0	1.56143e-05	0.000106467	3.0568e-05	7.58633e-05	0.00040327
Collembolispora	0.000106875	1.47822e-05	1.429e-05	0	2.92582e-05	0	0.000151775	0	0	0	0	4.80407e-05	5.58784e-05	2.799e-05	8.80747e-05	0	0.000424671	0.000113353	0	0.000729186	0	0.00232723	0	0	0	1.3788e-05	0	0	9.58812e-05	0	0	0	1.42243e-05	0	1.3885e-05	1.43221e-05	0	0.000156671	1.39338e-05	1.39667e-05	0	0	0	0	0	0	0	9.1036e-05	0
Saccharicola	1.52679e-05	0	0	0	0	0	1.51775e-05	0	0	0	0	3.20272e-05	0	0	1.46791e-05	0	0.000155713	0	0	1.42978e-05	0	8.36132e-05	0	0	0	0	0	0	0	1.36737e-05	0	0	0	0	1.3885e-05	0.000128899	0.000111962	0	0	0	0	0	0	0	0	0	0	0	0
Rhizophagus	0.00141991	0	4.287e-05	4.47027e-05	0.000687567	0	0	0	0	0	0.000479547	0.00160136	8.38176e-05	0.00190332	0	4.47501e-05	7.07784e-05	8.09664e-05	1.59635e-05	1.42978e-05	7.09915e-05	0.000264775	0	0	0	2.75759e-05	2.73515e-05	0	0	1.36737e-05	8.30484e-05	0.000110748	0.000611647	0.0007333	0.000388781	0.000143221	0.000391866	0.00229309	0.000209007	2.79334e-05	0.000138347	3.20693e-05	0.000344213	0.000268936	0.00084317	0.000304192	0.000168124	0	0.000186124
Scytalidium	0.000152679	0.000162604	0.00031438	0.000119207	0.000131662	0.000694473	0.000409793	0.000117367	0.000345901	0.000316034	0.000624864	0.000128109	0.000195574	0.000349875	0.00016147	0.000253584	0	0	0.000175598	1.42978e-05	0.00132044	0.000919745	0.000590062	0.000112255	0.000734296	0.000330911	8.20546e-05	0.000290774	0	2.73474e-05	5.53656e-05	0.000706019	4.2673e-05	0	1.3885e-05	0.000845006	0.000769737	0.00101124	0.00029261	0.00106147	3.07437e-05	0	0.000359859	0	0	0	0	4.5518e-05	0
Aureobasidium	0	0	0	0	0	0	0	0	0	0	0	0	0	0	0	0	0	0.00220229	0.00174002	0	0	0	0	0	0.000558704	0	0	0	0	0	0	0	0	0	0	0	0	0	0	0	0.000660989	8.01732e-05	0.000109522	0	0	0.000197725	9.17039e-05	7.58633e-05	0.000682456
Geastrum	1.52679e-05	1.47822e-05	0	1.49009e-05	4.38872e-05	2.72342e-05	6.071e-05	0.000102697	0	4.12218e-05	0	0	0	1.3995e-05	0.000587165	0.00219275	0	0	0	0	0	0	0	1.60364e-05	0	0	0	0	0	2.73474e-05	0	0	0	0	4.16551e-05	0	0	2.84856e-05	0	8.38001e-05	0	0	0	0	0	0	0	0	0
Calcarisporiella	0	1.47822e-05	0	2.98018e-05	0	0	0	5.86837e-05	4.15081e-05	0	2.90634e-05	0.00022419	0	5.59801e-05	4.40373e-05	0	0	0.000113353	0	2.85955e-05	5.67932e-05	0.00012542	2.80982e-05	0	0.000814111	0	0	1.38464e-05	0	0	0	0	1.42243e-05	0	0	0.000100255	0.000293899	0.000640925	2.78676e-05	4.19e-05	0	4.81039e-05	3.1292e-05	0.000110738	0	0	0	0	0
Erythrobasidium	7.63394e-05	4.43466e-05	5.716e-05	0.000119207	0.000117033	5.44685e-05	3.0355e-05	5.86837e-05	4.15081e-05	5.49624e-05	0.000101722	9.60815e-05	8.38176e-05	8.39701e-05	0.000278903	0.00022375	0.000212335	0.000372446	0.00142075	0.000157275	0.000156181	0.000278711	0.000168589	9.62186e-05	0.00106952	0	1.36758e-05	0	1.36973e-05	0	0.000373718	6.92176e-05	5.68974e-05	1.38359e-05	0.00013885	0.000214832	0.000405861	0.000299098	0.000153272	0.000223467	0.000568758	0.000400866	0.000391151	0.000379675	0.000124914	0.000821318	3.0568e-05	0.000242763	0.000806539
Geminibasidium	1.52679e-05	8.86931e-05	2.858e-05	0.000759946	0	0	4.55325e-05	0.00158446	0.00013836	6.8703e-05	0.000261571	8.00679e-05	0.00159253	1.3995e-05	7.33956e-05	0.00114859	0	9.71597e-05	0.000335233	0.000915057	0.00211555	9.75487e-05	0	0.000561275	0	1.3788e-05	0	0	0	0	0	0	0	0	0	0.000229154	0.000503828	0.000455769	0	0.000237433	1.53718e-05	0	0	0	0	0	0	0	1.55104e-05
Amanita	0	0	0	0	0	0	0	0	0	0	0	0	0	0	0	0	0	0.00207274	0.00119726	0	0	0	0	0	0.000143667	0	0	0	0	0	0	0	0	0	0	0	0	0	0	0	3.07437e-05	3.20693e-05	1.5646e-05	0	0	3.04192e-05	0.000168124	9.1036e-05	0.000558373
Filobasidium	0	0	0	0	0	0	0	0	0	1.37406e-05	0	0	0	0	0	0	4.24671e-05	0.000761084	0.000191562	0	0	0	0	1.60364e-05	0.000175593	0	0	0	0	0	0	0	0	0	0	0	0	0	0	0	3.07437e-05	0.00206847	0	0	0	4.56288e-05	3.0568e-05	7.58633e-05	0.000294697
Athelia	0	0	0	0	0	1.36171e-05	0	1.46709e-05	0.00204773	0	0	0	5.58784e-05	4.19851e-05	4.40373e-05	0	0.000368048	0	0	0	7.09915e-05	9.75487e-05	0	1.60364e-05	0	6.89398e-05	0	0	0	2.73474e-05	0	0	0	0	4.16551e-05	0.000128899	0	0	0	0	0	0	0	3.16396e-05	0	0	0	0	0
Gyroporus	0	0	0	0	0	0	0	0	0	0	0	0	0	0	0	0.00129775	0	0	0	0.00204458	0	0	0	0	0	0	0	0	0	0	0	0	0	0	0	0	0	0	0	0	0	0	0	0	0	0	0	0	0
Articulospora	0	2.95644e-05	1.429e-05	4.47027e-05	1.46291e-05	0	9.1065e-05	0	0	1.37406e-05	0	9.60815e-05	0.000111757	4.19851e-05	2.93582e-05	0	0.000396359	0.000242899	0.00202736	0.000371742	0	0.000181162	0	4.81093e-05	0	0	0	0	1.36973e-05	0	0	0	0	0	0	2.86443e-05	0	4.27283e-05	1.39338e-05	1.39667e-05	0	0	0	0	0	0	6.11359e-05	0	0
Hygrocybe	0	0	0	0	0	0	0	0	0	0	0	0	0	0	0	0	0	0.00200797	0.00119726	0	0	0	0	0	0.000127704	0	0	0	0	0	0	0	0	0	0	0	0	0	0	0	0.000138347	1.60346e-05	0.000109522	0	0	0	0.000244544	0.000106209	0.000310207
Monacrosporium	0.00071759	7.39109e-05	0.00065734	0.000521532	0.000848487	0.000245108	0.000713343	0.0012617	0.00195088	0.00067329	0.000639395	0.000144122	0	2.799e-05	0	0	0	0	0	4.28933e-05	0.000837699	0.00130994	0	0.000208474	0	0	4.10273e-05	2.76928e-05	0	0	0	0	0	0	0	0.000959583	1.39952e-05	0.000142428	0	0.0001257	0	0	0	0	0	0	0	0	0
Tomentella	0	0	1.429e-05	0	0	0	0	0	0	0	0	0	0	0	0	8.95001e-05	0	0.000793471	0.00191562	0	0	0	0	1.60364e-05	0	0	0	0	0	0	0	0	0	0	0	0	0	0	0	0	4.61155e-05	1.60346e-05	4.69381e-05	0.000142378	0	3.04192e-05	4.58519e-05	0	0.000542863
Hortaea	0	0	0	0	0	0	1.51775e-05	0	0	0	0	3.20272e-05	0	0	0	0	0	0.000485798	0.000223489	0	0	0	0	1.60364e-05	0.000111741	2.75759e-05	0	0	0	0	1.38414e-05	0	0	0	0	0	0	0	1.39338e-05	0	0.000107603	6.41385e-05	0.000797947	0.000506233	0.000421585	0.000182515	0.000122272	7.58633e-05	0.000961643
Cordana	0	0	1.429e-05	0	0	0	0	0	0	0	0.00188912	0.00131311	0	0	0	0	0	0	0	0	0	0	0	0	0	0	0	0	0	0	0	0	0	0	0	0	0	0	0	0	0	0	0	0	0	0	0	0	0
Devriesia	0	0	2.858e-05	8.94055e-05	1.46291e-05	1.36171e-05	0	8.80256e-05	0	0	2.90634e-05	0	2.79392e-05	2.799e-05	0	0	0	0.00187842	0.00121322	0	0	5.57421e-05	5.61964e-05	0	0.000446963	1.3788e-05	0	0	0	0	2.76828e-05	0	0	1.38359e-05	0	1.43221e-05	0	0	0	2.79334e-05	0.000783964	0.000224485	0.000109522	6.32791e-05	3.12285e-05	1.52096e-05	0.000320964	0.000106209	0.000108573
Mucor	0	1.47822e-05	0	0	1.46291e-05	0	1.51775e-05	0	0	0	0	0	0	0	0	1.49167e-05	0	0.00014574	0	0	0	0	0	0	0	0	0	0	0	0	0	0	0	0	0	0	0	0	0	0	0	0.000144312	0	9.49187e-05	0.000421585	4.56288e-05	0	4.5518e-05	0.000201635
Entrophospora	0	0	1.429e-05	1.49009e-05	2.92582e-05	4.08513e-05	0	5.86837e-05	1.3836e-05	1.37406e-05	0	1.60136e-05	5.58784e-05	2.799e-05	7.33956e-05	0	0.00103336	0	0	0.00177292	7.09915e-05	9.75487e-05	0	1.60364e-05	0	0	0	0	4.1092e-05	1.36737e-05	0	2.7687e-05	0	0	0	0.000114577	4.19856e-05	7.12139e-05	0	0	0	0	0	0	0	0	0	0	0
Savoryella	3.05357e-05	2.95644e-05	1.429e-05	4.47027e-05	5.85163e-05	0	1.51775e-05	8.80256e-05	9.68523e-05	2.74812e-05	0.00172927	0.000384326	0.000125726	0	4.40373e-05	8.95001e-05	0	0.00014574	0	0	0	0	0	0	0	0	0	0	0	0	0	2.7687e-05	0	0	0	2.86443e-05	1.39952e-05	1.42428e-05	0	5.58667e-05	0	0	0	0	0	0	0	0	0
Rachicladosporium	0	0	0	0	0	0	0	0	1.3836e-05	2.74812e-05	0	0	0	5.59801e-05	1.46791e-05	0	0	0	0.00170809	0	0	8.36132e-05	2.80982e-05	0	0	2.75759e-05	0	0	1.36973e-05	0	0	0	0	0	0	5.72885e-05	0	0	0	0	0	0	0	0	0	0	0	0	0
Oidiodendron	1.52679e-05	1.47822e-05	5.716e-05	0.000119207	4.38872e-05	1.36171e-05	0	2.93419e-05	1.3836e-05	0	0	4.80407e-05	2.79392e-05	0.00016794	0.000689918	0.00102925	0.000240647	0.00165171	0.00153249	0.00100084	1.41983e-05	6.96777e-05	0	3.20729e-05	0.000111741	1.3788e-05	0	0	0	0.000191432	0.000138414	0	1.42243e-05	2.76717e-05	0.000930297	0.00020051	0	0.000441526	0	2.79334e-05	3.07437e-05	1.60346e-05	1.5646e-05	0	0.000624571	0	0	0.000121381	0.000201635
Cochliobolus	0.000320625	7.39109e-05	0.00025722	7.45045e-05	0.000424243	4.08513e-05	0.000166953	0.00016138	0.000359737	0.000192368	4.35951e-05	0	0	0.000349875	0	0	0	0.000663925	0.000335233	0	0	0.000445937	2.80982e-05	0.000112255	0.000542741	0	0	0	2.73946e-05	2.73474e-05	1.38414e-05	0	5.68974e-05	0	0	0	0	0.00109669	1.39338e-05	0.0002933	1.53718e-05	0.00044897	0	3.16396e-05	0.000281057	0.000106467	0	0.000333799	0
Leptodiscella	3.05357e-05	2.95644e-05	0	0.000208613	8.77745e-05	0	7.58875e-05	0.000190722	0	0.00160765	5.81269e-05	0.000128109	1.39696e-05	2.799e-05	0	0	0	0	0	0	0	8.36132e-05	0	3.20729e-05	0	0	0	0	0	0	0	0	0	0	0	1.43221e-05	0	1.42428e-05	4.18014e-05	6.98334e-05	0	0	0	0	0	0	0	0	0
Archaeorhizomyces	0	0	0	0	0	0	0	0	0	0	0	0	0	0	0	0	0	0.00160314	0.000877991	0	0	0	0	0	0	0	0	0	0	0	0	0	0	0	0	0	0	0	0	0	9.22311e-05	0	4.69381e-05	3.16396e-05	3.12285e-05	1.52096e-05	1.5284e-05	3.03453e-05	0.000124083
Hanseniaspora	0	0	0	0	0	0	0	0	0	0	0	0	0	0	0	4.47501e-05	0.000212335	4.85798e-05	0	0.000328849	0	0	0	0	0	0	0	0	0	0	0	0	0	0	0	0	0	0	0	0	0.00016909	0	0	0	0	0	0	0.00159313	0
Pleospora	0	1.47822e-05	1.429e-05	0	0	0	3.0355e-05	0	5.53442e-05	0	4.35951e-05	8.00679e-05	0.000223514	1.3995e-05	0	0.000149167	0.000934275	0.000259093	0.000542758	0.000314551	0	6.96777e-05	4.21473e-05	6.41457e-05	0	0	1.36758e-05	0	0	0	0	5.53741e-05	1.42243e-05	1.38359e-05	1.3885e-05	0	1.39952e-05	5.69711e-05	8.36027e-05	2.79334e-05	0	0.00157139	0	0	0	0	3.0568e-05	0	0.000232656
Pseudogymnoascus	3.05357e-05	0.00013304	0	1.49009e-05	2.92582e-05	1.36171e-05	0.000333905	1.46709e-05	4.15081e-05	5.49624e-05	0.000188912	0.000400339	0.00033527	0.00022392	0.000102754	0.000566834	0.00138726	0.0014574	0.000383123	0.00155846	7.09915e-05	0.00040413	2.80982e-05	4.81093e-05	0.000399074	0	2.73515e-05	0	2.73946e-05	9.5716e-05	0	2.7687e-05	1.42243e-05	1.38359e-05	0	0.000372375	6.99761e-05	0.000156671	9.75365e-05	2.79334e-05	1.53718e-05	3.20693e-05	0.000125168	0.000332215	1.56143e-05	0.000228144	9.17039e-05	0.000212417	0.00128736
Paraconiothyrium	0.000167947	0.000177386	0.00022864	8.94055e-05	0.000117033	1.36171e-05	0.000258018	0.000264077	8.30163e-05	2.74812e-05	0.000145317	1.60136e-05	0	4.19851e-05	0	0	0.000184024	1.61933e-05	0	2.85955e-05	0.000354957	0.000209033	0.00030908	0	0	1.3788e-05	0	0	0	0	2.76828e-05	1.38435e-05	1.42243e-05	0	0	0	0.000223923	0.00061244	0.000222941	0	0	0	0	6.32791e-05	0	0	0	0	0
Calcarisporium	0	0	0	0	0	0	0	0	0	0	0	0	0	0	0	0	0	0	0.000159635	0	0	0	0	0	0	0	0	0	0	0	0	0	0	0	0	0	0	0	0	0	0	0	0	0	7.80713e-05	0	0	0	0
Neosetophoma	0	5.91287e-05	2.858e-05	0	2.92582e-05	0	0	0	0	5.49624e-05	2.90634e-05	0.000112095	0.000111757	4.19851e-05	0.000102754	8.95001e-05	0.000240647	0.000242899	0.00153249	0.000557613	1.41983e-05	0.000794325	2.80982e-05	0.000128291	7.98148e-05	1.3788e-05	1.36758e-05	0	0	1.36737e-05	0	0	1.42243e-05	0	0	0.000128899	0	0.000156671	0	6.98334e-05	0.000215206	0	6.25841e-05	0	4.68428e-05	0	1.5284e-05	3.03453e-05	0.000124083
Leptospora	0	0	0	0	0	0	0	0	0	2.74812e-05	1.45317e-05	8.00679e-05	1.39696e-05	6.99751e-05	5.87165e-05	0.000119334	0.000226491	3.23866e-05	0	7.14888e-05	0	0.000195097	0	0	4.78889e-05	0	0	0	0	0	0	0	0	0	0	2.86443e-05	1.39952e-05	0	0	0	3.07437e-05	0	0	0	4.68428e-05	0	0	0	0
Stachybotrys	0.000106875	0.000591287	0.00015719	0.000268216	0.000146291	0.000108937	0.000106243	0.00063085	0.000166033	0.00105803	7.26586e-05	0.000160136	0.000209544	0.00033588	0.000278903	0.000238667	0	0.000242899	0	1.42978e-05	8.51898e-05	5.57421e-05	0.000112393	0.000529202	0	4.13639e-05	0	0	0	0	0	0	0	0	2.77701e-05	0	0.000447847	1.42428e-05	0.000250808	0.000181567	4.61155e-05	0	0	0.000110738	0	0.000136886	0	0	0
Cordyceps	0	0	0	0	0	0	0	0	0	0	0	0	4.19088e-05	0	0	0	0	0.000485798	0.00143671	1.42978e-05	0	1.39355e-05	0	0	0	0	0	0	0	0	0	0	0	0	0	1.43221e-05	0	0	0	0	0	0	0	0	3.12285e-05	0	0.000106988	0	0
Glomus	0	1.47822e-05	0	0	0.000131662	0	0	0	0	1.37406e-05	0	9.60815e-05	0	0.00022392	4.40373e-05	0	0.00052376	0.000680118	0.00140479	0.000157275	0	0.00025084	0	4.81093e-05	6.38519e-05	4.13639e-05	0	0	1.36973e-05	0	0	0	0	0	2.77701e-05	4.29664e-05	0	0.000128185	0	1.39667e-05	4.61155e-05	0	0	0	0	0	1.5284e-05	0	0.000248166
Leptoxyphium	0.000732858	0.000103475	0.00025722	0.000119207	4.38872e-05	4.08513e-05	0.00012142	0.000704205	0.000318229	2.74812e-05	0	0	0	0	0	0	0	9.71597e-05	0	0	0	1.39355e-05	0	0	0	0	0	0.000124617	0.00139713	0	4.15242e-05	4.15305e-05	0.000142243	0.000581106	0	0	0.000111962	0	2.78676e-05	0.000111733	0	0	0	0	0.000359128	0	0	0	0
Cystofilobasidium	0	0	0.00011432	0	5.85163e-05	0	3.0355e-05	0	1.3836e-05	0	0	0	5.58784e-05	9.79651e-05	0.000102754	0	0.000184024	0.000437219	0.00138882	0.00038604	0	0.000195097	0	0	0	0	0	0	0	5.46949e-05	0	0	0	0	0	0.000143221	0	8.54567e-05	2.78676e-05	0	0	3.20693e-05	0	0	0	0	0.000106988	0	0.000263676
Clavaria	0	0	0	0	0	0	0	0	0	0	0	0	0	0	0	0	0	0.00136024	0.00036716	0	0	0	0	0	0.000111741	0	0	0	0	0	0	0	0	0	0	0	0	0	0	0	4.61155e-05	1.60346e-05	4.69381e-05	3.16396e-05	0.0001093	0.000197725	0	4.5518e-05	0.000728987
Paecilomyces	6.10715e-05	4.43466e-05	4.287e-05	1.49009e-05	2.92582e-05	0	4.55325e-05	4.40128e-05	4.15081e-05	4.12218e-05	0.00135145	0.00022419	8.38176e-05	5.59801e-05	2.93582e-05	0	0.000169868	8.09664e-05	0.000175598	7.14888e-05	0.000156181	0	1.40491e-05	6.41457e-05	0.000335222	4.13639e-05	0	2.76928e-05	0.000123276	8.20423e-05	8.30484e-05	0.000110748	0	1.38359e-05	8.33102e-05	0.000186188	0.000251914	0.000199399	2.78676e-05	0.0001257	0	0.000112242	0.000109522	0	4.68428e-05	0	0	0.000182072	0
Bipolaris	3.05357e-05	5.91287e-05	2.858e-05	0	2.92582e-05	0	0	7.33547e-05	0	0	1.45317e-05	0	0	0	0	0	0	0.000178126	0.000175598	1.42978e-05	0	0	0	0	0.000351185	0	0	0	0	0	0	0	0	0	0	0	0	0	0	0	4.61155e-05	1.60346e-05	3.1292e-05	0	9.36856e-05	6.08384e-05	4.58519e-05	9.1036e-05	0.000620415
Coprinellus	6.10715e-05	8.86931e-05	7.145e-05	2.98018e-05	2.92582e-05	8.17027e-05	4.55325e-05	2.93419e-05	1.3836e-05	5.49624e-05	0.000116254	0.000144122	0.000516875	0.00011196	0.000308261	1.49167e-05	0.000169868	0.00134404	0.00036716	0.000543315	0	0.00025084	0.00015454	8.01822e-05	0.000239444	0	1.36758e-05	4.15392e-05	5.47893e-05	5.46949e-05	1.38414e-05	4.15305e-05	5.68974e-05	1.38359e-05	5.55401e-05	0.000100255	0.000181938	0.000242127	0.000125404	9.77667e-05	0	0	3.1292e-05	0.000158198	3.12285e-05	6.08384e-05	0	1.51727e-05	3.10207e-05
Hysterangium	0	0	0	0	0	0	0	0	0	0	0	0	0	0	0	0	0	0.00134404	0.000351196	0	0	0	0	0	0.000526778	0	0	0	0	0	0	0	0	0	0	0	0	0	0	0	4.61155e-05	1.60346e-05	0.000109522	0.000189837	1.56143e-05	0.000106467	0.000106988	6.06907e-05	0
Ophiosphaerella	0	0	0	0	2.92582e-05	0	0	0	0	0	1.45317e-05	4.80407e-05	2.79392e-05	4.19851e-05	8.80747e-05	2.98334e-05	0	0.00014574	0.00105359	7.14888e-05	0	6.96777e-05	0	0	0	0	0	0	2.73946e-05	1.36737e-05	2.76828e-05	0	2.84487e-05	0	0	7.16107e-05	0	0.000185156	6.96689e-05	0	7.68592e-05	0.000160346	6.25841e-05	0	0	0	0.000213976	0.000212417	0
Coprinus	0	0	0	0	0	0	0	0	0	0	0	0	0	2.799e-05	0	0	0	0	0	0	0	0	0	0	0	0	0	0	0	0	0	0	0	0	0	0	0	0	0	0	0	0	0	0	0	0	0	0.00133519	0
Sterigmatomyces	0	0	0	0	0	0	0	0	1.3836e-05	0	1.45317e-05	0	0	0	1.46791e-05	0	0	4.85798e-05	0.000175598	4.28933e-05	4.25949e-05	0	1.40491e-05	0	0	1.3788e-05	1.36758e-05	0	0	0	0	0	1.42243e-05	0	0	1.43221e-05	5.59809e-05	0	0	0	0.000153718	8.01732e-05	0.000109522	0.000205657	0.000156143	0	0	7.58633e-05	0.000170614
Cephalotheca	3.05357e-05	2.95644e-05	2.858e-05	2.98018e-05	0.000117033	2.72342e-05	0.000136598	5.86837e-05	1.3836e-05	6.8703e-05	7.26586e-05	0.000272231	0.000153666	0.00013995	7.33956e-05	7.45835e-05	0.000905964	0	0	0.00100084	2.83966e-05	9.75487e-05	0.00125037	6.41457e-05	7.98148e-05	4.13639e-05	2.73515e-05	0	2.73946e-05	0.00010939	0	0	0	0	4.16551e-05	0.000243476	0.000181938	0.000170913	2.78676e-05	0	0	0	0	0	1.56143e-05	0	0	0	0.000108573
Sporisorium	0.000687054	0.000620852	0.00031438	0.000253315	0.000175549	8.17027e-05	0.000576745	2.93419e-05	4.15081e-05	0.000274812	0.000217976	0.000128109	0.000474966	0.000475831	0.00049909	8.95001e-05	0	0.000242899	0	0.000100084	5.67932e-05	0.000181162	0.000140491	0	3.19259e-05	0	0	1.38464e-05	0	0	5.53656e-05	0.000221496	0.000298711	9.6851e-05	0.000124965	0.000229154	0.000573804	0.00111094	0.000236874	0.000265367	4.61155e-05	3.20693e-05	0	0	6.24571e-05	0	0	6.06907e-05	0
Hydropisphaera	0	0	0	0	0	0	4.55325e-05	0	0	0	1.45317e-05	1.60136e-05	0	0	4.40373e-05	0	0	0.000161933	0.000558722	1.42978e-05	0	2.78711e-05	0	0	0	0	0	0	0	0	0	0	0	0	0	1.43221e-05	0	0	0	0	0	0	0	0	0	0	0	0	0
Rhizopycnis	0	0	1.429e-05	0	0	0	1.51775e-05	0	0	0	0.00126426	0.000544462	2.79392e-05	0.000237915	1.46791e-05	0	0	0.000210513	0	0	0	0	0	0	0.000399074	0	0	0	0	0	0	0	0	0	0	0	0	0	0	0	0	0	0	0.000142378	0	0	0.000259828	1.51727e-05	0.000139593
Sebacina	0	0	0	0	0	0	0	0	0	0	0	0	0	0	0	0.000507167	0	0.0012145	0.00124515	0.000214466	0	0.00012542	0	0	4.78889e-05	0	0	0	0	0	0	0	0	0	0	0	0	0	0	0	0	3.20693e-05	7.82301e-05	7.90989e-05	0	1.52096e-05	0	0.000121381	0.000899601
Thielaviopsis	0	0	0	0	0	0	0	0	0	0	0	0	0	0	0	0	0	0.00098779	0.000143671	0	0	0	0	0	0.000478889	0	0	0	0	0	0	0	0	0	0	0	0	0	0	0	7.68592e-05	4.81039e-05	0.000281628	0.000490413	9.36856e-05	0.000395449	0.000412667	0.000303453	0.00041878
Stagonosporopsis	3.05357e-05	8.86931e-05	2.858e-05	1.49009e-05	4.38872e-05	1.36171e-05	0.000136598	1.46709e-05	1.3836e-05	1.37406e-05	2.90634e-05	0.00022419	0.000223514	0.00019593	0.00016147	0.000104417	0.000169868	0.00098779	0.000718356	0.000157275	2.83966e-05	0.000362324	1.40491e-05	4.81093e-05	0	1.3788e-05	0	0	2.73946e-05	0.000123063	1.38414e-05	2.7687e-05	0	1.38359e-05	2.77701e-05	0.000930939	4.19856e-05	0.000142428	4.18014e-05	0	0.000107603	3.20693e-05	9.38761e-05	4.74593e-05	6.24571e-05	0.000197725	0.000397383	9.1036e-05	0.000868581
Psathyrella	7.63394e-05	1.47822e-05	0.00012861	0.000104306	2.92582e-05	8.17027e-05	1.51775e-05	0.000132038	0	8.24436e-05	0.000130785	0	0.00120139	0.00013995	0	0	0	9.71597e-05	0.000287343	4.28933e-05	1.41983e-05	2.78711e-05	0	0.000128291	0	0	0	0	0	2.73474e-05	0	0	0	0	0	1.43221e-05	2.79904e-05	2.84856e-05	2.78676e-05	0	0	1.60346e-05	0	0	0	0	3.0568e-05	0	0
Eutypella	6.10715e-05	4.43466e-05	0	2.98018e-05	4.38872e-05	1.36171e-05	1.51775e-05	7.33547e-05	0	8.24436e-05	0	0.000112095	0.000139696	0.000153945	5.87165e-05	0.000164084	0.000863497	0	0.000143671	0.00118671	4.25949e-05	0.000111484	2.80982e-05	8.01822e-05	0	2.75759e-05	0	0	2.73946e-05	1.36737e-05	0	0	1.42243e-05	0	0	0.000157543	1.39952e-05	7.12139e-05	2.78676e-05	0	0	3.20693e-05	0	0	9.36856e-05	0	0	0	0
Engyodontium	4.58036e-05	5.91287e-05	2.858e-05	0	0	0	0.000106243	0	0	1.37406e-05	4.35951e-05	0	1.39696e-05	0	2.93582e-05	0	0	0.00116592	0.000239452	8.57866e-05	0.000227173	0.000390195	2.80982e-05	0	0	0	0.000109406	4.15392e-05	0	0	0	2.7687e-05	0	0	0	0.000186188	0	4.27283e-05	0	1.39667e-05	0.000430412	0.000432935	0.000219044	0.000395495	0.000296671	0.000517126	0	0	0.000728987
Phaeosphaeria	0	0	0.00010003	0	0	0	6.071e-05	1.46709e-05	0	4.12218e-05	0.000101722	0.000192163	0.000153666	8.39701e-05	1.46791e-05	7.45835e-05	0.000368048	0.000307672	0	0.000357444	0	0.000933681	2.80982e-05	6.41457e-05	3.19259e-05	1.3788e-05	0	0	4.1092e-05	1.36737e-05	0	1.38435e-05	2.84487e-05	1.38359e-05	4.16551e-05	0.000128899	0	9.96995e-05	2.78676e-05	2.79334e-05	0	0.000224485	4.69381e-05	6.32791e-05	0.000655799	0	0	0	9.30622e-05
Paraphoma	3.05357e-05	0	0	0	0	0	1.51775e-05	2.93419e-05	1.3836e-05	4.12218e-05	2.90634e-05	0.000192163	0.000153666	9.79651e-05	5.87165e-05	0.000119334	0.000141557	0.000194319	0.000606612	0.000200169	0	0.00115665	0	4.81093e-05	0	4.13639e-05	0	1.38464e-05	1.36973e-05	0	1.38414e-05	0	0	0	0	0.000128899	0	4.27283e-05	1.39338e-05	0	0	0	0	0	0	0	0	0	0.000139593
Proliferodiscus	0	0	0	0	0	0	0	0	0	0	0	0	0	0	0	0	0	0.00113353	0.00031927	0	0	0	0	0	9.57778e-05	0	0	0	0	0	0	0	0	0	0	0	0	0	0	0	0.000707105	3.20693e-05	4.69381e-05	0	0	9.12575e-05	0	0.000136554	0
Claviceps	0	0	0	0	0	0	0	0	0	0	0	0	0	0	0	0	0	0	0	0	0	0.000181162	0	0	0	0	0	0	0	0	0	0	0	0	0	0	0	0.00109669	0	0	0	0	0	0	0	0	0	0	0
Thermoascus	6.10715e-05	1.47822e-05	0	0	1.46291e-05	4.08513e-05	4.55325e-05	8.80256e-05	2.76721e-05	5.49624e-05	5.81269e-05	0.000288244	0.000209544	8.39701e-05	8.80747e-05	7.45835e-05	0.000481293	8.09664e-05	3.1927e-05	0.00107233	8.51898e-05	0.000264775	0.000295031	0.000208474	0	1.3788e-05	1.36758e-05	2.76928e-05	1.36973e-05	0	0	2.7687e-05	0	1.38359e-05	1.3885e-05	0.000114577	0.000125957	0.000213642	2.78676e-05	0	1.53718e-05	0	0	0	0	0	0	0	0
Galerella	0	0	0	0	0	0	0	0	0	0	0	4.80407e-05	0	0	0	0	0	0	0	0	0	0	0	0	0.00106952	0	0	0	0	0	0	0	0	0	0	0	1.39952e-05	0	1.39338e-05	0	0	0	0	0	0	0	0	0	0
Coniochaeta	9.16072e-05	0.00013304	8.574e-05	7.45045e-05	0.000117033	0.000354045	4.55325e-05	1.46709e-05	0.000110688	2.74812e-05	4.35951e-05	9.60815e-05	9.77872e-05	0.00019593	0.000205508	0.000253584	0.00103336	6.47731e-05	0.000223489	0.000571911	0.000837699	0.000445937	7.02454e-05	0.000112255	7.98148e-05	0	5.47031e-05	0	0	2.73474e-05	4.15242e-05	1.38435e-05	1.42243e-05	0	4.16551e-05	0.000186188	0.000489832	0.000726382	4.18014e-05	8.38001e-05	6.14874e-05	0	0	0	0	0	0	3.03453e-05	0
Remersonia	0	1.47822e-05	1.429e-05	0	0	0	4.55325e-05	0	0	0	0.00103175	0.000320272	2.79392e-05	1.3995e-05	0.000411015	0.000283417	0	0	0.000239452	1.42978e-05	0	2.78711e-05	8.42945e-05	0	0	0	0	1.38464e-05	0	0	0	0	0	0	0	4.29664e-05	0	0	0	0	0	0	0	0	3.12285e-05	0	0	0	0
Schizothecium	0	0	0	0	0	1.36171e-05	0	1.46709e-05	1.3836e-05	2.74812e-05	0	0.000208177	0	2.799e-05	0.000132112	0	8.49341e-05	0.000129546	0.00102166	0	1.41983e-05	0.000111484	0	0	0.00015963	1.3788e-05	0	0	0	0	0	0	0	1.38359e-05	0	0.000186188	2.79904e-05	8.54567e-05	6.96689e-05	0	0	0	3.1292e-05	6.32791e-05	0	6.08384e-05	0	3.03453e-05	0
Rhizophydium	1.52679e-05	0.000280862	0	0	0	0	0.000622278	0	0	1.37406e-05	2.90634e-05	6.40543e-05	5.58784e-05	0.00016794	1.46791e-05	5.96668e-05	0	1.61933e-05	6.38539e-05	7.14888e-05	1.41983e-05	0.000153291	0	6.41457e-05	0	4.13639e-05	0	0	0	1.36737e-05	0.000249145	0.00023534	0.000128019	2.76717e-05	1.3885e-05	0.000214832	0	2.84856e-05	0	0.0002095	3.07437e-05	0.000962078	0.000203398	0	0.000530885	0	9.17039e-05	0	0
Dioszegia	3.05357e-05	1.47822e-05	5.716e-05	8.94055e-05	7.31454e-05	0	4.55325e-05	5.86837e-05	1.3836e-05	1.37406e-05	5.81269e-05	8.00679e-05	0.000167635	0.000237915	0.000146791	0	0.000169868	0.000388639	0.000622576	0.000114382	0.000113586	0.000432002	4.21473e-05	4.81093e-05	0.000526778	0	1.36758e-05	1.38464e-05	4.1092e-05	0	1.38414e-05	1.38435e-05	1.42243e-05	1.38359e-05	2.77701e-05	8.59328e-05	4.19856e-05	5.69711e-05	9.75365e-05	0.0001257	0.000107603	0.00024052	0	0.000838448	0.000171757	4.56288e-05	0	0.00022759	0.000294697
Pseudobotrytis	0	1.47822e-05	0	0	0	1.36171e-05	0	0	0	0	0	0	0	0	1.46791e-05	7.45835e-05	0	0	0	0	0.000298164	4.18066e-05	5.61964e-05	3.20729e-05	0.000383111	0	0	0	0	0	0	0	0	0	0	0.000128899	0.000167943	0.000313341	2.78676e-05	1.39667e-05	0	0	0	0	0	0	0	0	0
Scleroderma	7.63394e-05	7.39109e-05	2.858e-05	0.000178811	8.77745e-05	0	0.00012142	0.000381444	0.000124524	5.49624e-05	0.000130785	0.000272231	0.000181605	0	0.000411015	2.98334e-05	0	0.000291479	0.000159635	2.85955e-05	0.000482742	0.000292646	0.000941289	0.000384874	0.000191556	6.89398e-05	0	1.38464e-05	1.36973e-05	0	2.76828e-05	2.7687e-05	0	8.30151e-05	1.3885e-05	0.00040102	0.000237919	2.84856e-05	0.000599153	0.0001257	0	0	0	0	4.68428e-05	0	0	0	0
Linderina	0	0	0	0	0	0	0	0	2.76721e-05	0	0	0	0	0	1.46791e-05	0	0	0	0	0	0	0	0	0	0	0	0	0	0	0	0	0	0	0	0	0	0	0	0	0	0.000937683	3.20693e-05	0	0	0	0	0	0	0
Zymoseptoria	4.58036e-05	1.47822e-05	0	2.98018e-05	0	1.36171e-05	3.0355e-05	0	2.76721e-05	5.49624e-05	4.35951e-05	0.000288244	0.000167635	0.00019593	1.46791e-05	0	0.000934275	1.61933e-05	0	0.000142978	0.000113586	0.000515615	0	0	0	4.13639e-05	0	0	1.36973e-05	0	0	0	0	4.15076e-05	1.3885e-05	0.000343731	0	5.69711e-05	5.57351e-05	1.39667e-05	0	0	0	0	0	0	0	0	0
Tricholoma	4.58036e-05	1.47822e-05	1.429e-05	2.98018e-05	1.46291e-05	5.44685e-05	1.51775e-05	0	0	4.12218e-05	2.90634e-05	0.000144122	0.000125726	0.00030789	0.000102754	0.000387834	0.000920119	0.000518185	0.000271379	0.000671995	0	0.000933681	2.80982e-05	0.000240547	0	1.3788e-05	0	0	9.58812e-05	4.10212e-05	0	0	0	1.38359e-05	0	0.000143221	1.39952e-05	0.000156671	5.57351e-05	0	0	1.60346e-05	0	0	0	0	0	0	9.30622e-05
Spiromyces	0	0	0	0	0	0	0	0	0	0	0	0	0	0	0	0	0	0	0	0	0	0	2.80982e-05	0	0	0	0	9.69247e-05	0.000191762	0	0	1.38435e-05	0.000924583	0	1.3885e-05	0	4.19856e-05	0.000227885	5.57351e-05	0	0	0	0	0	0	0	0	0.000333799	0
Lipomyces	0.000122143	0.000162604	5.716e-05	0.000104306	0.000146291	0.000177022	0.000333905	0.000176051	0.000498098	8.24436e-05	0.000145317	9.60815e-05	0.000181605	2.799e-05	7.33956e-05	0	0	9.71597e-05	0	2.85955e-05	0.000795104	0.000264775	0.000449571	0.000240547	0	0.000165456	2.73515e-05	2.76928e-05	0	2.73474e-05	0	1.38435e-05	0	0	1.3885e-05	0.000143221	0.000461842	0.000683654	0.000278676	0.000279334	0.000153718	0.000192416	0.000125168	0.000253116	6.24571e-05	0	6.11359e-05	0	0
Cylindrocarpon	9.16072e-05	0.000103475	0.00012861	1.49009e-05	0.000204807	0.000149788	0.000895473	0.000176051	0.000110688	2.74812e-05	1.45317e-05	0.000208177	0.000153666	0.00013995	4.40373e-05	0.000253584	0.000268958	0.000421025	0	0.000371742	2.83966e-05	0.000153291	1.40491e-05	0.000208474	0	0	0	0	1.36973e-05	1.36737e-05	0	1.38435e-05	0	0	0	0.000386698	1.39952e-05	7.12139e-05	1.39338e-05	0	0	0	1.5646e-05	0	0	0	0	0	0
Pseudaleuria	0	0.000295644	0	0	0	0	0.000895473	2.93419e-05	0	0	0	0	0	4.19851e-05	2.93582e-05	0	5.66227e-05	0	0.000478904	1.42978e-05	0	2.78711e-05	0	0	0	0	0	0	4.1092e-05	2.73474e-05	0	1.38435e-05	0	0	0	0.000171866	0	0	0	0	0	0	0	0	0	0	0	0	0
Leotia	0	0	0	0	0	0	0	0	0	0	0	0	0	0	0	0	0	8.09664e-05	0.000877991	0	0	0	0	0	0	0	0	0	0	0	0	0	0	0	0	0	0	0	0	0	1.53718e-05	0	0	0	0	0	0	0	0
Dactylella	0	0.000118257	0.00010003	0	0	2.72342e-05	0	1.46709e-05	0.000152196	1.37406e-05	0	0	0	0	0	0	0	4.85798e-05	3.1927e-05	2.85955e-05	0	5.57421e-05	0	1.60364e-05	0	1.3788e-05	1.36758e-05	0	0	0	1.38414e-05	0	0	0	0	7.16107e-05	0	0	1.39338e-05	1.39667e-05	0.000107603	0	0	0	0.0001093	9.12575e-05	0.000106988	0.000348971	0
Wallrothiella	0	0	0	2.98018e-05	0	0	0	0.000132038	0	0	0	3.20272e-05	1.39696e-05	0	0	0	0	0	0	0	0	0	2.80982e-05	0	0	0	0	0	0	0	0	0	0	0	0	0	1.39952e-05	0	0	1.39667e-05	0	0	0	0	0	0	0	0	0
Glomerella	0	0	1.429e-05	1.49009e-05	0	0	0	0	0	1.37406e-05	2.90634e-05	0	1.39696e-05	6.99751e-05	0	0	0.000141557	0	0	0	0	1.39355e-05	0	0	0	8.27278e-05	0	0	0	0	2.76828e-05	8.30611e-05	0	0	0	0	0	0	0	0	0	0	0	0	3.12285e-05	7.60479e-05	0	0	0
Termitomyces	0	5.91287e-05	0	0	0.000190178	0	0	0	0	2.74812e-05	0	0	1.39696e-05	0	0	0	0	4.85798e-05	0	0	0	0	0	0	0	0	0	0	0	0	0	0	0	0	0	0	0	8.54567e-05	0	0	0	0	0	0	0	0	0	0	0.000186124
Phialemoniopsis	1.52679e-05	7.39109e-05	7.145e-05	2.98018e-05	5.85163e-05	6.80856e-05	7.58875e-05	5.86837e-05	0	2.74812e-05	7.26586e-05	0.000320272	0.000181605	9.79651e-05	1.46791e-05	0.000119334	0.000226491	0.000259093	0	0.000157275	0	0.00025084	0	0.000128291	0	1.3788e-05	1.36758e-05	0	1.36973e-05	0	0.000152255	1.38435e-05	5.68974e-05	0	1.3885e-05	5.72885e-05	2.79904e-05	2.84856e-05	6.96689e-05	0	6.14874e-05	0	0.00015646	0	0	1.52096e-05	0.000183408	0	0
Microdiplodia	0	0	0	0	0	0	0	0	0	0	0	1.60136e-05	0	0	0	2.98334e-05	0.000113245	0.000825857	0.000399087	0.000314551	0	0.000139355	0	0	0	0	0	0	0	1.36737e-05	0	1.38435e-05	0	0	0	2.86443e-05	0	4.27283e-05	0	0	0.000461155	0	9.38761e-05	0	0	3.04192e-05	9.17039e-05	6.06907e-05	6.20415e-05
Pochonia	1.52679e-05	4.43466e-05	0	0	0	0	7.58875e-05	0	2.76721e-05	0	0	0.000112095	2.79392e-05	0.000419851	7.33956e-05	8.95001e-05	0	9.71597e-05	6.38539e-05	7.14888e-05	0	0	0	0	0	0	5.47031e-05	1.38464e-05	0	0	0	0.000539897	2.84487e-05	0	0	0.000157543	0	1.42428e-05	0	6.98334e-05	3.07437e-05	0	0	0	1.56143e-05	0	0	0	0.000139593
Crinipellis	0	0	0	0	0	0	0	0	0	0	0	0	0	0	0	0	0	0	3.1927e-05	0	0	0	0	0	0	0	0	0	0	0	0	0	0	0	0	0	0	0	0	0	0	0	0	0	0	0	0	0	0
Fimetariella	0	0	0	0	0	0	0	0	0	0	0	0	0	0	0	0	0	0.000582958	0.00078221	0	7.09915e-05	1.39355e-05	0	0	9.57778e-05	0	0	0	0	0	0	0	0	0	0	0	1.39952e-05	0	0	0	7.68592e-05	0	0	0	0	6.08384e-05	0	1.51727e-05	0
Panaeolus	0	0	0	0	0	0	0	0	0	0	1.45317e-05	0	0	0	0	0	0	0.000259093	0.00078221	0	0	0	0	0	0	0	0	0	0	0	0	0	0	0	0	0	0	0	0	0	0	0	0	0	0	0	4.58519e-05	0	0
Microascus	0	0	0	2.98018e-05	0	0	4.55325e-05	0	0	0	0	0	0	0.00011196	2.93582e-05	0	9.90898e-05	0.000307672	0.000351196	0.000486124	0.000780906	0.000222969	0.000182638	0.000609385	0.000558704	0	0	1.38464e-05	4.1092e-05	2.73474e-05	0.000761277	0	0	2.76717e-05	0	0.000128899	0.000489832	9.96995e-05	0.00011147	0	6.14874e-05	1.60346e-05	0	0	1.56143e-05	3.04192e-05	0	7.58633e-05	0.000170614
Sphacelotheca	0	4.43466e-05	0	0	0	2.72342e-05	0	0	0	6.8703e-05	0	9.60815e-05	4.19088e-05	0.00011196	5.87165e-05	0	0.000311425	0	0	0.000271658	1.41983e-05	0.00078039	0	1.60364e-05	0	4.13639e-05	0	0	2.73946e-05	0	0	0	0	1.38359e-05	0	2.86443e-05	1.39952e-05	0	1.39338e-05	2.79334e-05	0	0	0	0	0	0	0	0	0
Leucosporidium	1.52679e-05	0	1.429e-05	0	0	2.72342e-05	0	0	0	8.24436e-05	4.35951e-05	8.00679e-05	0.000209544	5.59801e-05	0	0	0.000764407	3.23866e-05	0	2.85955e-05	0	8.36132e-05	0	8.01822e-05	0	1.3788e-05	0	1.38464e-05	1.36973e-05	0	0	0	0	0	4.16551e-05	7.16107e-05	0	2.84856e-05	0	2.79334e-05	0	0	0	0	0	0	0	0	0
Delicatula	1.52679e-05	0	0	0	0	0	0	0	0	0	0	0	0	0	0	0	0	0	0	0	0	0	0	0	0	0	0	0	0	0	0	0	0	0	0	0	0	0	0	0	0	0	0	0	0	0	0	0	0
Lycoperdon	9.16072e-05	0.000147822	0.00010003	0.00032782	7.31454e-05	0.000108937	0.00012142	0.000264077	0.000110688	2.74812e-05	0.000188912	0.00022419	0.000628632	0.000741736	0.000308261	0.000611584	0	8.09664e-05	0	2.85955e-05	0.000553733	6.96777e-05	0.000182638	4.81093e-05	0	0	1.36758e-05	0	0	4.10212e-05	4.15242e-05	1.38435e-05	2.84487e-05	0	1.3885e-05	0	1.39952e-05	0	1.39338e-05	5.58667e-05	0	1.60346e-05	0	0	0	0	0	7.58633e-05	0
Bulleromyces	4.58036e-05	0.000206951	1.429e-05	1.49009e-05	0	0	0.000622278	0	1.3836e-05	1.37406e-05	4.35951e-05	0.000112095	9.77872e-05	2.799e-05	4.40373e-05	5.96668e-05	0.000537916	1.61933e-05	9.57809e-05	0.000400337	1.41983e-05	0.000557421	1.40491e-05	6.41457e-05	0.000207519	0	0	0	2.73946e-05	1.36737e-05	0	1.38435e-05	1.42243e-05	0	1.3885e-05	5.72885e-05	1.39952e-05	2.84856e-05	0	0	0	0	0	0	0	0	6.11359e-05	1.51727e-05	0
Sphacelia	0	0	0	0	0	0	0	0	0	0	2.90634e-05	0	0	0	0	0	0	0	0	0	0.000141983	0	5.61964e-05	0	0	0	0	0	0	0	0	0	0	0	0	0	0.000209928	1.42428e-05	4.18014e-05	0	0	0	0	0	6.24571e-05	0	0	0	0
Polyporus	1.52679e-05	1.47822e-05	0	0	1.46291e-05	0	0	0	1.3836e-05	0	0	0	0	0	0	0	0	1.61933e-05	0.000207525	0	0	0	0	0	0.000718333	0	0	0	0	0	0	0	0	0	0	0	2.79904e-05	0	0	0	4.61155e-05	0	0	0	0	0	3.0568e-05	0	0.000279187
Entoloma	4.58036e-05	0	1.429e-05	0	0	6.80856e-05	3.0355e-05	4.40128e-05	1.3836e-05	0	1.45317e-05	0	9.77872e-05	1.3995e-05	2.93582e-05	2.98334e-05	0	0.000647731	0.00041505	0	5.67932e-05	5.57421e-05	9.83436e-05	3.20729e-05	0.000143667	2.75759e-05	0	0	0	2.73474e-05	8.30484e-05	0	0	0	0	4.29664e-05	6.99761e-05	0.000170913	5.57351e-05	1.39667e-05	4.61155e-05	0	0	1.58198e-05	0	7.60479e-05	0	3.03453e-05	0.000279187
Derxomyces	0	0	1.429e-05	0	0	0	0	0	0	0	0	0	0	0	0	0	0	0.000194319	0.000111744	0	0	4.18066e-05	0	0	0	0	0	0	0	0	0	0	0	0	0	7.16107e-05	0	0	0	1.39667e-05	6.14874e-05	0	0	0	0	0	0	0.000121381	0
Arthrinium	0.000106875	1.47822e-05	7.145e-05	0.000238415	0.000117033	2.72342e-05	9.1065e-05	0.000674863	9.68523e-05	0.000164887	1.45317e-05	0.000304258	0.000181605	0.000181935	4.40373e-05	0.000358001	0.000325581	0.000226706	1.59635e-05	0.000629102	0.000241371	0.000599228	5.61964e-05	0.000128291	0	0	0	0	1.36973e-05	1.36737e-05	0.000221462	0.000193809	0	0	0.00019439	5.72885e-05	0.000237919	0.000441526	5.57351e-05	9.77667e-05	1.53718e-05	4.81039e-05	0.000250336	0	0	0	9.17039e-05	0	0
Erysiphe	0	0	0	0	0	0	0	0	0	0	0.000188912	0	0	0	0	0	0	0	0	0	0	0	0	0	0	0	0	0	0	0	0	0	0	0	0	0	0	0	0	0	1.53718e-05	0	0	0	0	0	0	0	0
Funneliformis	3.05357e-05	0	0	0	0.000190178	0	0	4.40128e-05	1.3836e-05	2.74812e-05	0	0.000144122	0.000153666	0.0002799	7.33956e-05	0	0.000665317	0.000242899	0	0.000414635	0	0.000167226	0	3.20729e-05	0.000303296	6.89398e-05	0	0	1.36973e-05	0	1.38414e-05	0	0	0	2.77701e-05	0.000229154	0	0.000128185	1.39338e-05	1.39667e-05	0	0	4.69381e-05	6.32791e-05	0	0	0.000106988	4.5518e-05	0
Westerdykella	4.58036e-05	5.91287e-05	2.858e-05	2.98018e-05	4.38872e-05	2.72342e-05	9.1065e-05	0.000234735	5.53442e-05	2.74812e-05	0.000130785	0.000176149	0.000488936	6.99751e-05	0.000264224	0.000104417	0	0.000113353	0	2.85955e-05	0.000298164	2.78711e-05	0.00061816	0.000176401	0.000287333	0.000317123	0.000109406	0.000401545	8.21839e-05	5.46949e-05	0.000235304	0.000664489	0.000241814	2.76717e-05	8.33102e-05	2.86443e-05	2.79904e-05	5.69711e-05	0.000362278	0.000181567	0	8.01732e-05	4.69381e-05	0	7.80713e-05	4.56288e-05	6.11359e-05	0.000121381	0
Stilbella	0	0	0	0.00065564	0	0	0	0	0	0	0	3.20272e-05	0	0	0	0	5.66227e-05	6.47731e-05	0.000127708	8.57866e-05	0	0	1.40491e-05	0	0	0	0	0	0	0	0	0	1.42243e-05	0	1.3885e-05	2.86443e-05	0	4.27283e-05	1.39338e-05	0	0	0	0	0	0	0	0	0	0
Bullera	3.05357e-05	0	2.858e-05	1.49009e-05	0.00016092	4.08513e-05	7.58875e-05	7.33547e-05	2.76721e-05	1.37406e-05	0.000145317	8.00679e-05	1.39696e-05	8.39701e-05	0.000102754	8.95001e-05	0.000184024	0.000291479	0.000638539	0	0	0.000195097	0	1.60364e-05	0.000319259	2.75759e-05	0	0	4.1092e-05	1.36737e-05	2.76828e-05	1.38435e-05	4.2673e-05	2.76717e-05	6.94252e-05	1.43221e-05	4.19856e-05	0.000370312	2.78676e-05	0.000111733	7.68592e-05	1.60346e-05	7.82301e-05	0	0.000390357	0	0	0.000531043	0.000186124
Wardomyces	0	0	0	0	0	0	0	0	0	0	2.90634e-05	0.000112095	4.19088e-05	2.799e-05	1.46791e-05	0	0	0.000647731	0.000111744	1.42978e-05	0	9.75487e-05	1.40491e-05	0	0.000351185	1.3788e-05	0	0	0	0	0	0	0	0	0	0.000114577	0	0	0	0	3.07437e-05	0	1.5646e-05	0.000110738	0	6.08384e-05	0.000137556	0	0
Melanospora	4.58036e-05	1.47822e-05	0	0	0	0	3.0355e-05	0	0	2.74812e-05	1.45317e-05	3.20272e-05	0	1.3995e-05	7.33956e-05	0	7.07784e-05	0.000388639	0.000638539	0.000285955	0	0.00012542	1.40491e-05	1.60364e-05	9.57778e-05	1.3788e-05	0	0	0	0	0	0	0	0	0	5.72885e-05	4.19856e-05	0	0	0	0	0	0	0	0	0	0	0	0
Peziza	1.52679e-05	0	0	0	0	0	0	1.46709e-05	0	1.37406e-05	2.90634e-05	0	2.79392e-05	5.59801e-05	1.46791e-05	0	4.24671e-05	0.000323866	0.000638539	1.42978e-05	0	0.000209033	0	0	0	1.3788e-05	0	0	0	0	0	0	0	0	1.3885e-05	4.29664e-05	0	2.84856e-05	0	0	0	0	7.82301e-05	3.16396e-05	0	0	0	6.06907e-05	0.000155104
Trimmatostroma	0	0	0.00058589	0	0	0	0	0	0	1.37406e-05	0	0	1.39696e-05	0	0	0	7.07784e-05	0.000566765	0.000622576	0	0	0	0	0	0	0	0	0	2.73946e-05	8.20423e-05	0	0	0	0	0	0	0	0.000199399	1.39338e-05	0	0.000353552	0	0.000250336	7.90989e-05	0	0	0	1.51727e-05	0.000139593
Stagonospora	0	0	0	0	0	0	0	2.93419e-05	0	1.37406e-05	2.90634e-05	0	5.58784e-05	4.19851e-05	1.46791e-05	0	5.66227e-05	0.000615345	0.000399087	1.42978e-05	0	8.36132e-05	0	0	0	1.3788e-05	0	0	0	0	1.38414e-05	0	0	0	0	7.16107e-05	0	0	0	0	0	0.00020845	0	0	1.56143e-05	0	0	0	0
Coniothyrium	0	1.47822e-05	2.858e-05	0	1.46291e-05	0	4.55325e-05	0	0	1.37406e-05	0	0	8.38176e-05	4.19851e-05	1.46791e-05	0	7.07784e-05	3.23866e-05	0	0	0	4.18066e-05	0	0	0	0	0	1.38464e-05	0	0	0.000138414	0.000429149	0.000298711	0	1.3885e-05	1.43221e-05	1.39952e-05	7.12139e-05	0	4.19e-05	0	1.60346e-05	0	0	0.000437199	0	0	0	0
Dinemasporium	3.05357e-05	0	1.429e-05	0	0	1.36171e-05	0	0	0	0	0	0	0	0	0	0	0	0	0	0	0	0.000418066	0.000210736	0	0	0	0	0	0	0	0	0	0	0	0	0	0	0.000569711	0	0	0	0	0	0	0.000234214	0	0	0	1.55104e-05
Genabea	0	0	0	0	0	0	0	0	0	0	0	0	0	0	0	0	0	0.000566765	0	0	0	0	0	0	0	0	0	0	0	0	0	0	0	0	0	0	0	0	0	0	0	0	3.1292e-05	0	0	0	0	0	0
Xylogone	3.05357e-05	5.91287e-05	2.858e-05	0	7.31454e-05	5.44685e-05	0.00012142	1.46709e-05	0.000179869	4.12218e-05	7.26586e-05	0	0.00036321	0.00016794	0.000190828	0.000208834	5.66227e-05	0	0	0.000142978	0.000482742	0.000278711	0.000295031	0.000176401	0	1.3788e-05	0.000123082	0	1.36973e-05	1.36737e-05	1.38414e-05	2.7687e-05	1.42243e-05	1.38359e-05	1.3885e-05	8.59328e-05	0.000531818	0.00025637	0.000125404	4.19e-05	1.53718e-05	0	0	0	0	0	0	0	0
Pleurotus	4.58036e-05	2.95644e-05	0	5.96036e-05	1.46291e-05	0	1.51775e-05	0	0	2.74812e-05	4.35951e-05	9.60815e-05	1.39696e-05	1.3995e-05	2.93582e-05	1.49167e-05	0.000212335	1.61933e-05	6.38539e-05	0.000529017	1.41983e-05	2.78711e-05	2.80982e-05	3.20729e-05	0	0	0	0	0	4.10212e-05	0	1.38435e-05	1.42243e-05	0	0	4.29664e-05	0	0	1.39338e-05	0	1.53718e-05	0	0	0	0	0	0	0	0
Spizellomyces	7.63394e-05	0	0	1.49009e-05	0	0	6.071e-05	0.000176051	8.30163e-05	1.37406e-05	1.45317e-05	6.40543e-05	8.38176e-05	5.59801e-05	0	0	0	0.000210513	0.000399087	0.000243062	1.41983e-05	0	0.000112393	1.60364e-05	0.000223482	5.51519e-05	0.000123082	0	0	8.20423e-05	1.38414e-05	0	0	0	0	0.000171866	1.39952e-05	1.42428e-05	2.78676e-05	8.38001e-05	3.07437e-05	0	1.5646e-05	0	7.80713e-05	0	0.000106988	0	0
Eupenicillium	0	0	0	0	2.92582e-05	0	0	0	0	1.37406e-05	0	3.20272e-05	0	0	0	0	0	0.000501992	0.000526795	0	4.25949e-05	0	0	0	9.57778e-05	0	0	0	0	0	0	0	0	0	0	0	0	0	0	0	0	1.60346e-05	0	0	1.56143e-05	0	0	0	0.000294697
Exobasidium	1.52679e-05	0	0	0	0	0	0	1.46709e-05	1.3836e-05	0	0.000159849	0	0	2.799e-05	0	0	0	0.000518185	0.000383123	0	0	0	0	0	0	0	0	0	0	0	0	0	0	0	0	0	0	0	1.39338e-05	0	7.68592e-05	0.000432935	3.1292e-05	4.74593e-05	0	0.000136886	6.11359e-05	1.51727e-05	4.65311e-05
Acicuseptoria	0	4.43466e-05	0	0	2.92582e-05	0	7.58875e-05	0	2.76721e-05	0	0	4.80407e-05	2.79392e-05	5.59801e-05	1.46791e-05	0	0.000155713	0	0	0.00051472	1.41983e-05	0.000236904	0	0	0	2.75759e-05	0	0	2.73946e-05	2.73474e-05	1.38414e-05	0	1.42243e-05	1.38359e-05	1.3885e-05	0.000243476	0	5.69711e-05	0	0	0	0	0	0	0	0	0	0	0
Zygoascus	0	0	0	0	0	0	0	0	0	0	0	0	0	0	0	0	0	0	6.38539e-05	0	0	0	0	0	0	0	0	0	0	0	0	0	0	0	0	0	0	0	0	0	0	0	0	0	0	0	0	0	0
Thelephora	0	0	1.429e-05	0	0	0	0	0	0	0	0	0	0	0	0	0	0	0.000226706	0.000510831	0	4.25949e-05	1.39355e-05	0	0	0	0	0	0	0	0	0	0	0	0	0	2.86443e-05	2.79904e-05	1.42428e-05	0	0	0	3.20693e-05	0	0	0	0	0	0	0
Perenniporia	0	0	1.429e-05	1.49009e-05	5.85163e-05	1.36171e-05	9.1065e-05	5.86837e-05	0	4.12218e-05	1.45317e-05	0.000112095	4.19088e-05	2.799e-05	5.87165e-05	0	0	4.85798e-05	0	0	2.83966e-05	0	0	0	0	0	0	0	2.73946e-05	1.36737e-05	0	1.38435e-05	2.84487e-05	1.38359e-05	0	2.86443e-05	9.79665e-05	0.000128185	2.78676e-05	5.58667e-05	0	0	0	4.74593e-05	0	0	0	0	0
Coprinopsis	3.05357e-05	4.43466e-05	1.429e-05	5.96036e-05	7.31454e-05	4.08513e-05	0.000151775	0.000176051	9.68523e-05	1.37406e-05	2.90634e-05	6.40543e-05	0.000405118	0.000293895	8.80747e-05	0.000164084	8.49341e-05	0.000501992	0.000223489	0.000100084	5.67932e-05	0.00025084	2.80982e-05	0	0	1.3788e-05	0	2.76928e-05	0	1.36737e-05	6.9207e-05	4.15305e-05	0	0	0	0.000100255	1.39952e-05	1.42428e-05	4.18014e-05	0	0	1.60346e-05	3.1292e-05	0	1.56143e-05	7.60479e-05	0	0.000409662	0.000341228
Cadophora	1.52679e-05	0	0	0	0	0	3.0355e-05	0	4.15081e-05	1.37406e-05	0	1.60136e-05	0	9.79651e-05	1.46791e-05	0	0	0	3.1927e-05	0.000100084	0	0.000487744	0	1.60364e-05	0	1.3788e-05	0	1.38464e-05	0	0	0	0	0	0	0	2.86443e-05	0	2.84856e-05	0	0	1.53718e-05	0	0	0	0	0	0	0	0
Neodeightonia	3.05357e-05	0	1.429e-05	0.000149009	0.000219436	0	1.51775e-05	0.000337431	8.30163e-05	5.49624e-05	7.26586e-05	0.000144122	4.19088e-05	0	0	0	0	0	0	0	0	0	0	0	0	0	0	0	0	0	0	0	0	0	0	0	0	0	0	0	0	0	0	0	0	0	0	0	0
Coriolopsis	0	0	0	0	0	0	0	0	0	0	0	1.60136e-05	0	0	8.80747e-05	0	0.00019818	4.85798e-05	0	0.000486124	0	0	1.40491e-05	1.60364e-05	0	0	0	0	0	0	0	0	0	0	0	0	1.39952e-05	2.84856e-05	0	1.39667e-05	0	0	0	0	0	0	0	0	7.75518e-05
Chaetomella	1.52679e-05	1.47822e-05	1.429e-05	1.49009e-05	0	2.72342e-05	0.000106243	0	0	0	1.45317e-05	0	4.19088e-05	1.3995e-05	0	0	0	4.85798e-05	0	0	0	0	0	0	0	0	0	0	0	0	0	0	0	0	0	0	0	0	0	0	0	0	0	0	0	0	0	0	9.30622e-05
Monocillium	0	1.47822e-05	0	0	0	1.36171e-05	6.071e-05	0	0	0	0	0	0	0	0	0	0	0	0.000175598	0	2.83966e-05	0.000236904	0	0	0	0	0	0	0	0	0	0	0	0	0	0	1.39952e-05	0.000170913	0	0	0	4.81039e-05	4.69381e-05	0	6.24571e-05	0	0	0	0
Pyrenochaeta	0	1.47822e-05	0	2.98018e-05	0	2.72342e-05	0	0	0	0	0	0	6.9848e-05	0	4.40373e-05	5.96668e-05	0.000240647	9.71597e-05	0.000478904	0.000100084	0	0	0	0	0	1.3788e-05	0	0	0	0	0	0	0	0	0	5.72885e-05	0	0	0	0	0	0	0	4.74593e-05	0	0	0	0	7.75518e-05
Sarcinomyces	0	0	0	0	0	0	0	0	0	0	0	0	0	0	0	0	0	1.61933e-05	0	0	0	0.000473808	0	0	0	0	0	0	0	0	0	0	0	0	1.3885e-05	0	0	0	0	0	0	0	0	0	0	0	0	0	0
Lindtneria	0.000106875	0.00047303	1.429e-05	0.000119207	2.92582e-05	2.72342e-05	3.0355e-05	2.93419e-05	1.3836e-05	0	0	0	0	0	0	0	0	0	0	0	0	0	0	3.20729e-05	0	0	1.36758e-05	0	0.000287644	0	1.38414e-05	2.7687e-05	0	0	0	0	0	1.42428e-05	0	2.79334e-05	1.53718e-05	0	0	0	0	0	0	0	0
Pseudozyma	4.58036e-05	0.000147822	0.00010003	2.98018e-05	0.000146291	8.17027e-05	9.1065e-05	0.000220064	5.53442e-05	1.37406e-05	2.90634e-05	0.000112095	1.39696e-05	0.00039186	0.00016147	0.000119334	0	0.000161933	0.000143671	0	1.41983e-05	0.000334453	0.000126442	3.20729e-05	3.19259e-05	4.13639e-05	0	2.76928e-05	1.36973e-05	0	2.76828e-05	2.7687e-05	0	1.38359e-05	2.77701e-05	7.16107e-05	0.000377871	0.000470012	9.75365e-05	0.000321234	1.53718e-05	3.20693e-05	0	0.000142378	1.56143e-05	0	1.5284e-05	0	0
Xylaria	3.05357e-05	0	0	2.98018e-05	1.46291e-05	1.36171e-05	1.51775e-05	5.86837e-05	0	0.000467181	0.000101722	3.20272e-05	5.58784e-05	5.59801e-05	7.33956e-05	0.000417667	0.000297269	0.000129546	0	0.000214466	9.93881e-05	6.96777e-05	0.000140491	3.20729e-05	0	0	0	0	1.36973e-05	1.36737e-05	0	0	0	0	0	7.16107e-05	0.000111962	0.000199399	1.39338e-05	4.19e-05	0	0	0	0	0	0	0	0	0
Kockovaella	0	1.47822e-05	0	0	1.46291e-05	0	0	0	0	0	0	0	0	0	0	0	0	0	0	0	0	0	0	0	0	0	0	0	0	0	0	0	0	0	0	1.43221e-05	0	0	0	0	0	0	0.000187752	0	0	0	0	1.51727e-05	0
Cercophora	3.05357e-05	1.47822e-05	0	1.49009e-05	8.77745e-05	0	0	2.93419e-05	0	0	5.81269e-05	0.000464394	2.79392e-05	8.39701e-05	0.000117433	0	0.000240647	4.85798e-05	0.000271379	7.14888e-05	1.41983e-05	0.000167226	1.40491e-05	0	0	1.3788e-05	0	0	1.36973e-05	0	0	1.38435e-05	0	0	1.3885e-05	5.72885e-05	0	8.54567e-05	4.18014e-05	0	0	0	0	0	0	0	0	0	0
Cenococcum	0	0	0	0	0	0	0	0	0	0	0	0	0	0	0	0	0	9.71597e-05	0.000462941	0	0	0	0	0	0	0	0	0	0	0	0	0	0	0	0	0	0	0	0	0	0	0	0	0	0	0	0	0	0.000155104
Hansfordia	3.05357e-05	1.47822e-05	2.858e-05	0	1.46291e-05	1.36171e-05	1.51775e-05	0	0	1.37406e-05	1.45317e-05	0	2.79392e-05	2.799e-05	0	0	0.000127401	6.47731e-05	0	2.85955e-05	2.83966e-05	2.78711e-05	0	0	0.000143667	0	0	0	0	2.73474e-05	2.76828e-05	2.7687e-05	1.42243e-05	0	0	0.000157543	0.000167943	9.96995e-05	5.57351e-05	0.000195533	0	0	0	0	0	0	0	0.000212417	0
Peniophora	4.58036e-05	0	0	0	0	1.36171e-05	0.00012142	0	0	0	5.81269e-05	0	0.000111757	0	2.93582e-05	0	0.000452982	4.85798e-05	4.78904e-05	0.000214466	8.51898e-05	5.57421e-05	0	1.60364e-05	0	0	0	0	0	0	0	1.38435e-05	0	0	0	0	0	8.54567e-05	0	0	1.53718e-05	0	0	0	0	0.000121677	0	0	0
Schizophyllum	3.05357e-05	4.43466e-05	5.716e-05	4.47027e-05	5.85163e-05	1.36171e-05	9.1065e-05	0.00016138	1.3836e-05	8.24436e-05	0.000261571	0.000112095	0.000125726	0.000265905	7.33956e-05	0.000193917	0.000283114	3.23866e-05	0.000239452	0.000428933	5.67932e-05	9.75487e-05	7.02454e-05	4.81093e-05	0	1.3788e-05	2.73515e-05	0	0	1.36737e-05	1.38414e-05	2.7687e-05	4.2673e-05	0	6.94252e-05	2.86443e-05	4.19856e-05	0.000341827	2.78676e-05	8.38001e-05	3.07437e-05	3.20693e-05	0	0	0	0	0	0	0
Cephaliophora	0	0	0	0	0	0	0	0	0	1.37406e-05	0.000450483	1.60136e-05	0	1.3995e-05	1.46791e-05	0	0.000113245	0	0	0	0	0	0	0	0	0	0	0	0	0	0	0	0	0	0	0	0	0	0	0	0	0	0	0	0	0	0	0	0
Resupinatus	3.05357e-05	0	0	0	1.46291e-05	0	0	0	0	0	0	0	0	0	0	0	0	0	0	0	0	0	0	0	0	0	0	0	0	0	0	0	0	0	0	0	0	0	0	0.000446934	0	0	0	0	0	0	0	0	0
Ochrocladosporium	0	0	0	0	0	0	0	0	0	0	0	0	0	0	0	0	0	0	0.000255416	0	0	0	0	0	0	0	0	0	0	0	0	0	0	0	0	0	0	0	0	0	0	0	0	0	0	0	0	0	0.000294697
Rotiferophthora	0	0	0	0.000253315	0	0	0	0.000440128	0	0	4.35951e-05	0	2.79392e-05	0	0	0	0	0	0	0	0	0	1.40491e-05	0	0	0	0	0	0	0	6.9207e-05	0	0	0	0.00011108	4.29664e-05	0	0	1.39338e-05	0	0.000138347	0	0	0	0	0	0	0	0
Kazachstania	0	0	0	0	0	0	0	0	0	0	1.45317e-05	0	1.39696e-05	0	0	7.45835e-05	0.000155713	6.47731e-05	0.000431014	1.42978e-05	0	1.39355e-05	0	0	0	0	0	0	0	0	0	0	0	0	0	0	0	0	0	0	0	0	0	0	0	0	0.000106988	0.000303453	9.30622e-05
Cylindrium	0	0	0.0004287	0	0	0	1.51775e-05	0	4.15081e-05	1.37406e-05	0	0	0	5.59801e-05	0	0	0	0	0	0	2.83966e-05	0	0	0	0	1.3788e-05	0	0	0	0	0	0	4.2673e-05	0	1.3885e-05	0	0	0	1.39338e-05	0	0	0	0	0	0	0	0	0	0
Brycekendrickomyces	0	0	8.574e-05	0	0	0	0	0	0	0	0	0	0	1.3995e-05	0	0	0	3.23866e-05	0	0	0	1.39355e-05	0	0	0	0	0	0	0.000136973	0	0	0	0	0	0	2.86443e-05	0	0	0	0	6.14874e-05	0	0	7.90989e-05	0	0	0	0	0
Xenomeris	0	0	0	0	0	0	0	0	1.3836e-05	0	0	0	0	0	0	0	0	0.000421025	0.000223489	0	0	2.78711e-05	0	0	0.000255407	0	0	0	0	0	0	0	0	0	0	0	0	0	0	0	0.000122975	0	0.00015646	0	0	3.04192e-05	0	0.000106209	0
Trechispora	0	0	4.287e-05	0	0	0	0	0	0	0	0	0	0	0	0	0	0	0.000307672	9.57809e-05	0	0	0	0	0	0.000127704	0	0	0	0	0	0	0	0	0	0	0	0	0	0	0	0.000122975	3.20693e-05	4.69381e-05	0	3.12285e-05	0	7.64199e-05	0	0
Botryobasidium	0	0	0	0	0	0	0	0	0	0	0	0	0	0	0	0	0	0	0	0	0	0	0	0	0	0	0	0	0	0	0	0	0	0	0	0	0	0	0	0	0	0	0	0	0	0	0.000122272	0	0
Rhizopus	0	0	0	0	0	0	0	0	0	0	0	0	0	0	0	0	0	0.000226706	6.38539e-05	0	0	0	0	0	0.000287333	0	0	0	0	0	0	0	0	0	0	0	0	0	0	0	1.53718e-05	1.60346e-05	4.69381e-05	3.16396e-05	3.12285e-05	0	0.000183408	0.000121381	9.30622e-05
Lecythophora	4.58036e-05	0	0	0	2.92582e-05	0	1.51775e-05	0	0	0	0	0	0	0.00011196	0	0	0.000240647	3.23866e-05	0.000127708	2.85955e-05	0	1.39355e-05	5.61964e-05	0.000208474	0	0.000220607	4.10273e-05	0	6.84866e-05	2.73474e-05	0.000221462	0.000387618	0	0.000415076	0	0.000214832	1.39952e-05	1.42428e-05	4.18014e-05	0	0	0.000352762	0	0	0	0	0	0	0
Elaphomyces	0	0	0	0	0	0	0	0	0	0	0	0	0	0	0	0	0	0	0.00041505	0	0	0	0	0	0	0	0	0	0	0	0	0	0	0	0	0	0	0	0	0	3.07437e-05	0	0	0	0	0	0	0	0
Arthrographis	1.52679e-05	2.95644e-05	0	1.49009e-05	1.46291e-05	0.000108937	4.55325e-05	0	0	5.49624e-05	0	0	9.77872e-05	0.000209925	0.000264224	0.00013425	0	0	0	1.42978e-05	0	2.78711e-05	2.80982e-05	1.60364e-05	0.000143667	1.3788e-05	1.36758e-05	6.92319e-05	9.58812e-05	1.36737e-05	8.30484e-05	1.38435e-05	2.84487e-05	0	2.77701e-05	0.000257798	0	1.42428e-05	1.39338e-05	0	6.14874e-05	0	3.1292e-05	6.32791e-05	3.12285e-05	0	0.000122272	1.51727e-05	0
Ochroconis	1.52679e-05	0.000162604	1.429e-05	0	2.92582e-05	0	0.000166953	4.40128e-05	2.76721e-05	6.8703e-05	2.90634e-05	3.20272e-05	0	5.59801e-05	5.87165e-05	7.45835e-05	0.000155713	0.00014574	0.000175598	0	0	0	0	1.60364e-05	0	0	0	0	0	4.10212e-05	6.9207e-05	0	0	0	0	4.29664e-05	0	0	1.39338e-05	0	3.07437e-05	1.60346e-05	4.69381e-05	0	0	0	0	4.5518e-05	0
Pseudotomentella	0	0	0	0	0	0	0	0	0	0	0	0	0	0	0	0	0	0.000404832	0.000127708	0	0	0	0	0	0	0	0	0	0	0	0	0	0	0	0	0	0	0	0	0	0	1.60346e-05	0	0	0	0	0	0	0
Verticillium	1.52679e-05	4.43466e-05	0	1.49009e-05	1.46291e-05	1.36171e-05	3.0355e-05	1.46709e-05	0	0	4.35951e-05	8.00679e-05	0.000139696	4.19851e-05	2.93582e-05	0	0.000311425	9.71597e-05	0	5.71911e-05	0	9.75487e-05	0	0.000176401	0	1.3788e-05	0	0	0	1.36737e-05	0	0	0	0	0	0.00040102	0	0	4.18014e-05	4.19e-05	0	0	0	0	0	0	4.58519e-05	0	0
Truncatella	3.05357e-05	4.43466e-05	0	0	5.85163e-05	0	3.0355e-05	0	0	0	1.45317e-05	3.20272e-05	0	2.799e-05	1.46791e-05	0	0.00019818	0	0	0.000157275	0	1.39355e-05	0	3.20729e-05	0	0	0	0	2.73946e-05	8.20423e-05	0	0	0	0	1.3885e-05	0.00040102	0	0	1.39338e-05	0	0	0	0	0	0	0	0	0	0
Limacella	0	0	0	0	0	0	0	0	0	0	0	0	0	0	0	0	0	8.09664e-05	0.000399087	0	0	0	0	0	0	0	0	0	0	0	0	0	0	0	0	0	0	0	0	0	0	0	0	0	0	0	0	0	0
Torrubiella	0	0	0	0	0	0	0	0	0	0	1.45317e-05	0	0	0	0	0	0.000212335	0.000178126	0.000239452	0	0	2.78711e-05	0	1.60364e-05	0.000287333	0	0	0	0	0	0	0	0	0	0	0	0	0	0	0	0	1.60346e-05	7.82301e-05	0	3.12285e-05	0.000106467	0.000183408	1.51727e-05	4.65311e-05
Amauroascus	0	0	0	0	0	0	0	0	0	0	0	0	0	0	0	0	0	0	0	0	0	0	0	0	0	0	0	0	0	0	0	0	0	0	0	0	0	0	0	0	0	0	0	0	0	0	0	0	0
Eurotium	0	0	0	0	0	0	0	0	0	0	0	0	0	0	0	0	4.24671e-05	0	0	0	0	0	0	0	0	0	0	0	0	0	0	0	0	0	0	0	1.39952e-05	0	0	0	0	0	0	0	0	0	0	0	0
Saccharomycodes	0	0	0	0	0	0	0	0	0	0	4.35951e-05	1.60136e-05	0	0	0	1.49167e-05	0.000382203	0	0	0.000271658	0	1.39355e-05	1.40491e-05	0	0	0	0	0	0	0	0	0	0	0	0	0	2.79904e-05	0	0	0	0	0	0	0	0	0	0	0	0
Chaetopsinectria	0	0	0	0	0	0	0	0	0	0	0	0	0	0	0	0	0	0	0	0	0	0	0	0	0	0	0	0	0	0	0	0	0	0	0	0	0	0	0	0	0	0	0	0	0	0	0	0	0
Athelopsis	0	0.000295644	0	0	0	0	0.000379438	0	0	1.37406e-05	0	0.000112095	9.77872e-05	0	0	0	0	0	0	2.85955e-05	0	1.39355e-05	1.40491e-05	1.60364e-05	0.000207519	0	0	0	1.36973e-05	0	0	0	0	0	0	2.86443e-05	0	0	0	0	0	0	0	0	0	0	0	0	0
Mariannaea	0	0	0	0	0	0	0	0	0	0	0.000159849	0	0	0	2.93582e-05	0	0.000212335	0	0	0	0	0	0	0	0	0	0	0	0	1.36737e-05	0.000373718	2.7687e-05	0	0	0	0	0	0	0	0	0	4.81039e-05	0	0	0	0	0	0	0
Astraeus	0	0	0	0	0	0	0	0	0	0	0	0	0	0	0	0.00022375	0	0	0	0.000371742	0	0	0	0	0	0	0	0	0	0	0	0	0	0	0	0	0	0	0	0	0	0	0	0	0	0	0	0	0
Blakeslea	0	0	0	0	0	0	0	0	0	0	0	0	0	0	0	0	0	0	0	0	0	0	0	0	0.000367148	0	0	0	0	0	0	0	0	0	0	0	0	0	0	0	0	0	0	1.58198e-05	0	0	0	0	0
Letendraea	1.52679e-05	1.47822e-05	0.00012861	4.47027e-05	1.46291e-05	1.36171e-05	9.1065e-05	4.40128e-05	4.15081e-05	4.12218e-05	5.81269e-05	1.60136e-05	0	1.3995e-05	1.46791e-05	2.98334e-05	0	1.61933e-05	0.000127708	7.14888e-05	1.41983e-05	0	0	4.81093e-05	0	0	0	0	2.73946e-05	0	0.000110731	0	0	1.38359e-05	0	1.43221e-05	0.000167943	7.12139e-05	1.39338e-05	0.000139667	0	0	7.82301e-05	0	0.000171757	0	0	0.000364144	0
Paraglomus	4.58036e-05	5.91287e-05	1.429e-05	1.49009e-05	0.000219436	0	3.0355e-05	0	0	0	1.45317e-05	9.60815e-05	5.58784e-05	0.00036387	4.40373e-05	0	0.000283114	0	0	0.000214466	1.41983e-05	0.000209033	1.40491e-05	0	0	4.13639e-05	0	0	4.1092e-05	5.46949e-05	0	0	0	0	2.77701e-05	0.000186188	0	0.000299098	0	0	0	0	0	0	0	0	0	0	0
Ganoderma	6.10715e-05	0.000162604	0.00011432	5.96036e-05	0.000102404	0.000122554	9.1065e-05	0.000117367	0.000110688	4.12218e-05	0.000101722	0.000112095	0.00036321	0.000153945	0.000220187	0.000149167	0	8.09664e-05	0	0	0.000141983	0.000153291	7.02454e-05	3.20729e-05	0	0	0	4.15392e-05	0	4.10212e-05	2.76828e-05	4.15305e-05	1.42243e-05	4.15076e-05	4.16551e-05	0.000128899	6.99761e-05	7.12139e-05	1.39338e-05	2.79334e-05	0	4.81039e-05	3.1292e-05	0	1.56143e-05	0	0	0	0
Pyrenophora	0	0	0	0	0	0	0	0	0	0	0	0	0	0	0	0	0	0.000113353	0.000207525	0	0	0	0	0	0	0	0	0	0	0	0	0	0	0	0	0	0	0	0	0	0	4.81039e-05	0	0	0	0	0	0	0.000201635
Toxicocladosporium	0	0	0	0	0	0	0	0	0	0	0	0	0	2.799e-05	0	0	8.49341e-05	3.23866e-05	0	0	1.41983e-05	0	0	0	0	0	0	0	0	0	0	0	0	0	0	4.29664e-05	0	0	0	0	4.61155e-05	1.60346e-05	0	0	1.56143e-05	0	0	0	0
Mycocentrospora	0	0	0	0	0	0	0	0	0	0	0	0	0	0	0	0	0	0.000356252	0.000111744	0	0	0	0	0	0	0	0	0	0	0	0	0	0	0	0	0	0	0	0	0	0	0	0	0.000110738	0	0	0	0	4.65311e-05
Ceratocystis	3.05357e-05	0	0	0	1.46291e-05	0	1.51775e-05	0	1.3836e-05	1.37406e-05	0	0	6.9848e-05	2.799e-05	1.46791e-05	0	9.90898e-05	0	0	0	0.000212974	0.000167226	0	1.60364e-05	0.000239444	0	0	0	0	1.36737e-05	0	0	0	1.38359e-05	0	7.16107e-05	0.000335885	0.000128185	0	0	0	0	0	0	0	0	0	0	0
Tremella	3.05357e-05	7.39109e-05	5.716e-05	1.49009e-05	0	6.80856e-05	0	0	1.3836e-05	0	7.26586e-05	0	0	0	0	0	0	0	0	0	0	1.39355e-05	0	0	0.00015963	0	0	0	1.36973e-05	0	0	0	1.42243e-05	5.53434e-05	0	0	0	0	4.18014e-05	0	1.53718e-05	0.000256554	4.69381e-05	0	6.24571e-05	0	0	0	0
Mycoleptodiscus	6.10715e-05	2.95644e-05	0	4.47027e-05	0	0	6.071e-05	0	0	0	0	0.000336285	0	0	7.33956e-05	0	0	3.23866e-05	0	0	0	0	0	0	0	0	0	0	0	1.36737e-05	0	0	4.2673e-05	0	0	0	0	0	0	0	0	0	0	0	0	0	0	0	0
Sphaerosporella	0	0	0	0	0	0	0	0	0	1.37406e-05	0	0	0	0	0	0	0	0.000161933	0.000335233	0	0	0	0	0	0	0	0	0	0	0	0	0	0	0	0	0	0	0	0	0	1.53718e-05	0	0	0	0	0	0	0	0.000108573
Pseudorobillarda	0	0	0	2.98018e-05	0.000102404	1.36171e-05	1.51775e-05	0	1.3836e-05	0	0	4.80407e-05	0	6.99751e-05	0	0	4.24671e-05	0.000259093	0	4.28933e-05	0	0.000222969	0	1.60364e-05	0	0	0	0	0	0	0	0	0	0	0	1.43221e-05	0	0	0	0	1.53718e-05	0	0	0	0.000265443	0	0	0	0
Diplogelasinospora	0	1.47822e-05	0	0	0	0	0	0	0	0	0	0	0	0	0	0	0	0.000323866	7.98174e-05	0	4.25949e-05	0	0	0	0	0	0	0	0	0	0	0	0	0	0	0	0	0	0	0	3.07437e-05	1.60346e-05	9.38761e-05	0	0	0	0	0	3.10207e-05
Capnodium	0	2.95644e-05	0	0	0	0	0	0	0	0	0	0	0	0	0	0	0	0.000323866	0	0	0	0	0	0	0	0	0	0	0	2.73474e-05	0	0	0	0	0	0	0	0	0	0	1.53718e-05	1.60346e-05	0	0	0	0	9.17039e-05	0	0
Hymenochaete	0	0	0	0	0	0	0	0	0	0	1.45317e-05	0	0	0	0	0	0	3.23866e-05	0.000159635	0	0	0	0	0	0	0	0	0	0	0	0	0	0	0	0	0	0	0	0	2.79334e-05	1.53718e-05	3.20693e-05	7.82301e-05	0	0	0	0	0	0
Wilcoxina	0	0	0	0	0	0	0	0	0	0	0	0	0	0	0	0	0	0.000275286	0.00031927	0	0	0	0	0	0	0	0	0	0	0	0	0	0	0	0	0	0	0	0	0	3.07437e-05	0	0	1.58198e-05	0	0	0	0	7.75518e-05
Physalacria	0	4.43466e-05	0	0.000134108	0	0	0	0	0	0	1.45317e-05	0	0	0	0	0	0	0	0	0	0	0	0	0	0	0	0	0	0	0	0	0	0	0	0	0	0	0	0	0	0	0	0	0	0	0	0	0	0
Macrocybe	0	0	0	0	0	0	0	0	0	0	0	0	0	0	0	0	0	0	0	0	0	0	0	0	0	0	0	0	0	0	0	0	0	0	0	0	0	0	0	0	0	0	0	0	0	0	0	0	0
Byssochlamys	0	0	0	0	0	0	0	0	0	0	0	0	0	0	0	0	0	0	0	0	0	1.39355e-05	0	0	0	0	0	0	0	0.000314496	0	0	4.2673e-05	0	0.000222161	0	0	0	0	0	0	0	0	0	0	0	0	0	0
Strelitziana	0	0	2.858e-05	0	0	1.36171e-05	0	0	0	0	0	0	0	0	2.93582e-05	0	0	0.000259093	0.000239452	2.85955e-05	0	0	0	0	0	0	0	0	0	0	1.38414e-05	0	0	0	0	0	0	0	0	0	1.53718e-05	0	0	0	0	0	0	0	0
Betamyces	0	0	0	0	0	0	0	0	0	0	1.45317e-05	3.20272e-05	1.39696e-05	0	0	0	0.000311425	0	0	0	2.83966e-05	1.39355e-05	0	0.000128291	0	2.75759e-05	0	0	0	2.73474e-05	0	0	0	2.76717e-05	0	2.86443e-05	0	2.84856e-05	1.39338e-05	1.39667e-05	0	0	0	0	0	0	0	0	0
Xylomyces	0	0	0	0	0	0	0	0	4.15081e-05	0	0	0	0	0	0	0	0	0	0	0	0	0	0	0	0	1.3788e-05	2.73515e-05	0	2.73946e-05	9.5716e-05	0	4.15305e-05	0	2.76717e-05	0.000222161	0	0	0	0	0	0	3.20693e-05	0	0.000237297	0	0	0	0	0.000310207
Flagellospora	0	0	0	0	0	0	0	0	0	0	0	0	0	0	0	0	0	6.47731e-05	0	0	0	0	0	0	0	0	0	0	0	0	0	0	0	0	0	0	0	0	0	0	0	0	0	0	0	0	0	0	0
Phialosimplex	0	0	0	0	0	0	3.0355e-05	0	0	0	1.45317e-05	3.20272e-05	4.19088e-05	0	0	0	0	0.000210513	7.98174e-05	0	0	2.78711e-05	0	0	0	0	0	0	0	0	0	1.38435e-05	0	0	0	1.43221e-05	0	0	0	0	0	0	0	0	0	0	0	0	0
Endosporium	0	0	0	0	0	0	0	0	0	0	0	0	0	0	0	0	0	0	0	0	0	0	0	0	0	0	0	0	0	0	0	0	0	0	0	0	0	0	0	0	0	0	0	0	0	0	0	0	0
Bensingtonia	1.52679e-05	0	0	0	1.46291e-05	0	1.51775e-05	0	0	0	0	1.60136e-05	8.38176e-05	0	0	0	0	0.00014574	0.000303306	0	0	5.57421e-05	1.40491e-05	1.60364e-05	0	0	0	0	0	0	0	0	0	0	0	2.86443e-05	0	1.42428e-05	0	1.39667e-05	0	1.60346e-05	0	0	0	0.000106467	3.0568e-05	0	7.75518e-05
Phaeocytostroma	0	0	0	0	0	0	0	0	0	0	0	0	0	0	0	0	0	0	0	0	0	0	0	0	0.000303296	0	0	0	0	0	0	0	0	0	0	0	0	1.42428e-05	0	0	0	0	0	0	0	0	0	0	0
Lepista	0	0	0	5.96036e-05	0	0	0	8.80256e-05	0	0.000302293	0	0	0	0	0	0	0	0	0	0	0	0	0	0	0	0	0	0	0	0	0	0	0	0	0	0	0	0	0	0	0	0	0	0	0	0	0	0	0
Hypoxylon	0	2.95644e-05	0	0	0	0	1.51775e-05	2.93419e-05	0	0	0	0	0	0	0	0	0	0	0.000127708	0	2.83966e-05	1.39355e-05	0	0	0	0	0	1.38464e-05	0	0	0	0	0	0	1.3885e-05	5.72885e-05	4.19856e-05	1.42428e-05	2.78676e-05	0	1.53718e-05	1.60346e-05	0	0	0	0	0	0	0
Ampelomyces	0	0	0	0	0	0	0	0	0	0	0	0	0	0	0	0	0	6.47731e-05	0	0	0	0	0	0	0	0	0	0	0	0	0	0	0	0	0	0	0	0	0	0	3.07437e-05	0	3.1292e-05	0	1.56143e-05	4.56288e-05	0	4.5518e-05	0.000139593
Neonectria	0	0	2.858e-05	0	2.92582e-05	0	0.000136598	0	0	0	0	1.60136e-05	0	5.59801e-05	0	0	4.24671e-05	0	0	0.000100084	0	5.57421e-05	1.40491e-05	0	0	1.3788e-05	0	1.38464e-05	0	1.36737e-05	0	0	0	0	1.3885e-05	0.000300765	0	4.27283e-05	0	0	0	0	0	0	0	0	0	0	0
Apodus	0	0	0	0	0	0	0	0	0	4.12218e-05	1.45317e-05	6.40543e-05	5.58784e-05	2.799e-05	1.46791e-05	0	0.000141557	6.47731e-05	4.78904e-05	0.000157275	0	1.39355e-05	1.40491e-05	1.60364e-05	0	0	0	0	0	4.10212e-05	0	0	0	0	0	0	0	0	0	0	0	0	0	0	0	0	0	0	0
Cistella	0	0	0	0	0	0	0	0	0	0	0	1.60136e-05	2.79392e-05	0	0	0	0.000297269	3.23866e-05	0	0	0	0	2.80982e-05	1.60364e-05	0	1.3788e-05	0	0	1.36973e-05	0	0	0	0	0	0	0	0	0	0	0	0	0	0	0	0	0	0	0	0
Staninwardia	0	0	1.429e-05	0	0	0	4.55325e-05	0	0	0	0	0	0	0	0	0	0	0	0	0	0	0	0	0	0	0	0	0	0	0	0	0	0	2.76717e-05	1.3885e-05	0	0	8.54567e-05	1.39338e-05	0	6.14874e-05	0.00020845	7.82301e-05	0	0	0	0	0	0
Teratosphaeria	0	0	0	0	0	0	0	0	0	0	0	0	0	0	0	0	0	0.000291479	6.38539e-05	0	0	0	0	0	0	0	0	0	0	0	0	0	0	0	0	0	0	0	0	6.98334e-05	0	0	0	0	0	0	0	0	0
Thanatephorus	0	0	0	0	0	0	1.51775e-05	0	0	0	0	0	1.39696e-05	0	0	1.49167e-05	0.000184024	0.000291479	0.000207525	0	0	2.78711e-05	1.40491e-05	0	0.000239444	0	0	0	0	0	0	0	0	0	0	1.43221e-05	0	0	0	0	0	0	4.69381e-05	0	0	0	0	0	0.000170614
Resinicium	1.52679e-05	0	0	0	0	0	0	0	0	0	0	0	0	0	0	0	0	0.000210513	0.000223489	0	0	0	0	0	0.000127704	0	0	0	0	0	0	0	0	0	0	0	0	0	0	0	3.07437e-05	0	0	0	0	0	0	0	0
Madurella	0	0	0	0	0	0	0	0	0	0	0	0	0	0	0	0	0	9.71597e-05	0.000287343	0	0	0	0	0	0	0	0	0	0	0	0	0	0	0	0	0	0	0	0	0	0	0	0	0.000126558	0	0.000121677	4.58519e-05	0	0
Leucocoprinus	0	0	0	0	0	0	0	0	0	0	0	0	0	0	0	0	0	0	0	2.85955e-05	0	0	0	0	0	0	0	0	0	0.000287148	0	1.38435e-05	0	0	0	0	0	0	0	0	0	0	0	0	0	0	0	0	0
Caecomyces	0	0	0	0	0	0	0	0	0	0	0	0	0	0	0	0	0	4.85798e-05	6.38539e-05	0	0	0	0	0	0	0	0	0	0	0	0	0	0	0	0	0	0	0	0	0	0	0	0	0	1.56143e-05	0	0	0	9.30622e-05
Udeniomyces	0	1.47822e-05	0	4.47027e-05	4.38872e-05	0	0	0	0	1.37406e-05	1.45317e-05	1.60136e-05	4.19088e-05	9.79651e-05	0	0	0.000283114	0	0	7.14888e-05	1.41983e-05	6.96777e-05	0	6.41457e-05	0	1.3788e-05	0	0	0	0	0	0	0	0	1.3885e-05	5.72885e-05	0	5.69711e-05	0	0	0	0	0	0	0	0	0	0	0
Bolbitius	0	0	0	0	0	0	0	0	0	6.8703e-05	4.35951e-05	0	4.19088e-05	0	0	0.000149167	0.000283114	0	0	7.14888e-05	1.41983e-05	1.39355e-05	0	1.60364e-05	0	1.3788e-05	0	0	0	0	1.38414e-05	0	0	0	0	2.86443e-05	0	4.27283e-05	2.78676e-05	0	0	0	0	0	0	0	0	0	0
Pyricularia	0	0	2.858e-05	0	0	0	0	4.40128e-05	0	0	0	0	0	1.3995e-05	0	0	0	0	0	0	0	1.39355e-05	0	4.81093e-05	0	0	0	0	0	0	0	0	0	0	0	0	0	1.42428e-05	0	9.77667e-05	3.07437e-05	0	0	0	0	0	1.5284e-05	0	0
Penidiella	0	0	0	0	0	0	0	0	0	0	0	3.20272e-05	0	0	0	0	0	0	0.000223489	0	0	0	0	1.60364e-05	0	0	0	0	0	0	0	0	0	0	0	0	0	0	0	0	6.14874e-05	6.41385e-05	0.000172106	7.90989e-05	6.24571e-05	4.56288e-05	0	0	0
Ascochyta	4.58036e-05	0	1.429e-05	0	0	0	0	0	0	0	0	0	0	0	0	0	0	6.47731e-05	0	0	0	6.96777e-05	0	0	0	0	0	0	0	0	0	0	0	0	0	0	0	0	2.78676e-05	0	0	0	0	0	0	0	0	0	0
Isaria	0	0	0	0	0	0	0	2.93419e-05	0	0	0	0	1.39696e-05	0	0	0	0	0	0	0	0	0	0	0	0	0	0	0	0	0	0	0	0	0	0	0	0	0	0	0	0	0	0	0	0	0	0	0	0
Lachnum	1.52679e-05	2.95644e-05	0	0	0	0	1.51775e-05	1.46709e-05	0	0	5.81269e-05	3.20272e-05	8.38176e-05	0	1.46791e-05	5.96668e-05	9.90898e-05	0	0	0.000271658	0	1.39355e-05	0	3.20729e-05	0	0	0	0	1.36973e-05	0	0	0	0	0	0	0	0	2.84856e-05	0	1.39667e-05	0	0	0	0	0	0	0	0	0
Ascorhizoctonia	0	0	0	0	0	0	0	0	0	0	0	3.20272e-05	0	0	0	5.96668e-05	0.000226491	8.09664e-05	0.000271379	0.000100084	0	0	0	0	0	0	0	0	0	0	0	0	0	0	0	0	0	0	0	0	0	0	0	0	0	0	0	0	0
Lachnellula	0	0	0	0	0	0	0	0	0	0	0	0	0	0	0	0	0	3.23866e-05	0	0	0	0	0	0	0	0	0	0	0	0	0	0	0	0	0	0	0	0	0	0	0	0	0	0	0	0	0	0	0
Nigroporus	0	0	0	0	0	0	0	0	0	0	0	0	0	0	0	0	0	1.61933e-05	0	0	0	0	0	0	0	0	0	0	0	0	0	0	0	0	0	0	0	0	0	0	0	0	0	0	0	0	0	0	0
Lyophyllum	0	0	0	0	0	0	0	0	0	5.49624e-05	0	0	0	6.99751e-05	0.000249545	0.0002685	0	0	0.000111744	0	0.000269768	1.39355e-05	0	0	0	1.3788e-05	0	0	0	0	0	1.38435e-05	0	0	0	0	1.39952e-05	8.54567e-05	0	0	0	1.60346e-05	0	0	0	0	0	0	0
Occultifur	0	0	0	1.49009e-05	0	0	0	8.80256e-05	1.3836e-05	2.74812e-05	2.90634e-05	0	4.19088e-05	0	1.46791e-05	0	0.000268958	0.000161933	0	0.000100084	0	0.000167226	0	6.41457e-05	0.00015963	0	0	0	0	0	0	0	0	0	0	2.86443e-05	1.39952e-05	0	0	0	0	0	0	0	0	0	0	0	0.000170614
Dentipellis	0	0	0	0	0	0	0	0	0	0	0	0	0	0	0	0	0	0	0	0	0	0	0	0	0	0	0	0	0	0	0	0	0	0	0	0	0	0	0	0	0	0	0	0	0	0	0	0	0
Lentinus	0	0	0	0	2.92582e-05	0	0	0	0	0	0	0	0	0	0	7.45835e-05	0	0	0	0	0	0	0	0	0	0	0	0	0	0	0	0	0	0	0	0	0	0	0	1.39667e-05	0	0	0	0	0	0	0	0	0
Uwebraunia	0	0	0	0	2.92582e-05	2.72342e-05	0	1.46709e-05	1.3836e-05	0	0	0	0	4.19851e-05	0.000146791	2.98334e-05	0	9.71597e-05	9.57809e-05	0	0	4.18066e-05	0	0	0	0	0	0	0	0	0	0	0	0	0	0	0	0	0	2.79334e-05	0	0	0	0	0	0	0	0	0
Leohumicola	0	0	0	0	0	0	0	0	0	0	0	0	0	0	0	0	0	0.000259093	0.000207525	0	0	0	0	0	0	0	0	0	0	0	0	0	0	0	0	0	0	0	0	0	0	1.60346e-05	0	0	0	0	0	0	0
Coniosporium	0	1.47822e-05	1.429e-05	0	0	0	0	1.46709e-05	0	0	0	0	0	0	0	0	0	0	0.000111744	0	0	0	0	0	0	0	0	0	0	0	0	0	0	0	0	0	0	0	0	0	0	0	0	0	0	0	0	0	0
Tomentellopsis	0	0	0	0	0	0	0	0	0	0	0	0	0	0	0	0	0	4.85798e-05	0	0	0	0	0	0	0.000255407	0	0	0	0	0	0	0	0	0	0	0	0	0	0	0	0	0	1.5646e-05	0	0	0	0	0	0
Eremothecium	0	0	0	0	0	0	0	0	0	0	0	0	0	0	0	0	0	0.000129546	9.57809e-05	0	0	0	0	0	7.98148e-05	0	0	0	0	0	0	0	0	0	0	0	0	0	0	0	0	0.000112242	0	0	0	0	0	0	0
Ophiognomonia	0	0	0	0	0	2.72342e-05	0	0	0	0	0	0	2.79392e-05	1.3995e-05	0	7.45835e-05	0.000254802	0	0	8.57866e-05	0	6.96777e-05	0	0	0	0	0	0	0	0	0	0	0	0	0	0	0	0	0	0	0	0	0	0	0	0	0	0	0
Hymenula	0	0	0	0	0	0	0	2.93419e-05	1.3836e-05	1.37406e-05	0	4.80407e-05	0.000167635	0	1.46791e-05	7.45835e-05	0.000254802	0	0	0.00012868	4.25949e-05	1.39355e-05	0	1.60364e-05	0	1.3788e-05	0	0	0	1.36737e-05	0	0	0	0	0	0	0	2.84856e-05	0	0	0	0	0	0	0	0	0	0	0
Plenodomus	0	0	0	0	0	0	0	0	0	0	0	1.60136e-05	0	0	0	0	0	0	0	5.71911e-05	0	0.00025084	0	0	0	0	0	0	1.36973e-05	0	0	0	0	0	0	0	0	0	0	0	0	0	0	0	0	0	0	0	0
Exserohilum	0	0	7.145e-05	0	0	0	0.000106243	0	0	0	0	0	0	0	0.000249545	0.000164084	0	0	6.38539e-05	0	0	0	0	0	0	0	0	0	0	0	0	0	0	0	0	0	0	0	0	0	0	0	0	0	0	0	0	0	0
Microcera	0	0	0	0	0	0	0	0	0	0	0	0	0	0	0	0	0	0.000210513	3.1927e-05	0	0	0	0	0	0	0	0	0	0	0	0	0	0	0	0	0	0	0	0	0	1.53718e-05	0	0	0	0	0	0	0	4.65311e-05
Saccharomycopsis	0	0	0	0	0	0	3.0355e-05	0	0	0	0	0	0	0	0	0	0.000212335	6.47731e-05	0	0.000100084	1.41983e-05	4.18066e-05	2.80982e-05	0	0	1.3788e-05	0	0	0	0	0	0	0	0	0	8.59328e-05	0	1.42428e-05	0	0	0	0	3.1292e-05	0	0	1.52096e-05	0	0.00022759	0.000248166
Postia	0	0	0	0	0	0	0	0	0	0	0	0	0	0	0	0	0	0	0	0	0	0	0	0	0	0	0	0	0	0	0	0	0	0	0	0	0	0	0	0	0	0	0	0	0	0	4.58519e-05	0	0
Vermispora	1.52679e-05	0	0.00024293	0	0	0	0	0	0	0	0	0	5.58784e-05	0	2.93582e-05	0	0.000113245	0	0	7.14888e-05	0	0	0	0	0	0	0	0	0	0	0	0	0	0	1.3885e-05	0	0	0	0	0	0	0	0	0	0	0	0	0	0
Chaetocalathus	0	0	0	0	0	0	0	0	0	0	0	0	0	0	0	0	0	0	0	0	0	0	0	0	0	0	0	0	0	0	0	0	0	0	0	0	0	0	0	0	0	0	0	0	0	0	0	0	0
Rhizopogon	0	0	0	0	0	0	0	0	0	0	0	0	0	0	0	0	0	4.85798e-05	0.000127708	0	0	0	0	0	0	0	0	0	0	0	0	0	0	0	0	0	0	0	0	0	3.07437e-05	0	0	0	0	0	0	9.1036e-05	0
Capronia	0	0	0	0	0	0	0	0	0	0	0	0	0	0	0	0	0.000240647	6.47731e-05	0	1.42978e-05	0	1.39355e-05	0.000126442	3.20729e-05	0	0	0	0	0	0	0	0	0	0	0	1.43221e-05	0	0	0	0	0	0	0	0	0	0	0	3.03453e-05	0
Yunnania	0	0	0	0	1.46291e-05	0	0	0	0	0	0	0.000112095	2.79392e-05	0	2.93582e-05	0	0.000240647	0	0	0	0	0	4.21473e-05	1.60364e-05	0	0	0	0	0	0	0	0	0	0	0	1.43221e-05	0	1.42428e-05	0	0	0	0	0	0	0	0	0	0	0
Myceliophthora	0	0	1.429e-05	0	1.46291e-05	0	1.51775e-05	0	0	0	1.45317e-05	0.000240204	0	1.3995e-05	1.46791e-05	0	0.000169868	0.000129546	0	0	0	4.18066e-05	0	0	0	0	0	0	0	0	0	0	0	0	0	0.000143221	0	0	0	0	0	0	0	0	0	0	0	0	0
Massarina	0	1.47822e-05	0	1.49009e-05	1.46291e-05	2.72342e-05	7.58875e-05	0	0	0	0	0	6.9848e-05	1.3995e-05	5.87165e-05	0	0	3.23866e-05	0	0.000185871	0	2.78711e-05	0	3.20729e-05	0	0	0	0	2.73946e-05	1.36737e-05	0	0	0	0	0	0.000100255	4.19856e-05	2.84856e-05	1.39338e-05	0	0	0	0	0	0	0	0	0	0
Tinctoporellus	0	0	0	0	0	0	0	0	0	0	0	0	0	0	0	0	0	0.000129546	4.78904e-05	0	0	0	0	0	0	0	0	0	0	0	0	0	0	0	0	0	0	0	0	0	0	0	6.25841e-05	0	0	0	0	0	0
Junghuhnia	0	0	0	0	0	0	0	0	0	0	0	0	0	0	0	0	0	0	0	0	0	0	0	0	0	0	0	0	0	0	0	0	0	0	0	0	0	0	0	0	0	0	0	0	0	0	0	0	0
Trametes	0	0	0	0	0	0	0	0	4.15081e-05	2.74812e-05	1.45317e-05	0	5.58784e-05	5.59801e-05	0	4.47501e-05	5.66227e-05	0	0	1.42978e-05	4.25949e-05	0.000236904	0	3.20729e-05	0	0	0	0	0	0	0	0	0	0	0	1.43221e-05	1.39952e-05	4.27283e-05	0	0	0	0	0	0	0	0	0	0	0
Coralloidiomyces	0	1.47822e-05	0	1.49009e-05	0	0	0	0	0	5.49624e-05	1.45317e-05	8.00679e-05	0	5.59801e-05	1.46791e-05	0	8.49341e-05	0	0	0.000200169	0	0.000236904	0	1.60364e-05	0	1.3788e-05	0	0	0	1.36737e-05	0	0	0	0	2.77701e-05	1.43221e-05	1.39952e-05	0	1.39338e-05	2.79334e-05	0	0	0	0	0	0	0	0	0
Modicella	0	0	0	0	0	0	0	0	0	0	0	0	0	0	0	0	0	0	0	0	0	0	0	0	0	0	0	0	0	0	0	0	0	0	0	0	0	0	0	0	0	0	0	0	0	0	0	0	0.000232656
Alphamyces	0	0	0	0	0	0	0	0	0	0	0	0	0	0	0	0	0	9.71597e-05	0	0	0	0	0	0	0	0	0	0	0	0	0	0	0	0	0	0	0	0	0	0	0	0	0	0	0	0	0	0	0
Villosiclava	1.52679e-05	0	0	0	0	0	0	2.93419e-05	0	0	0	0	0	0	0	0	0	3.23866e-05	9.57809e-05	0	4.25949e-05	0	0	0	0	0	0	0	0	0	1.38414e-05	0	0	0	0	0	0	4.27283e-05	1.39338e-05	0	0	3.20693e-05	9.38761e-05	1.58198e-05	3.12285e-05	3.04192e-05	0	0	0
Odontia	0	0	0	0	0	0	0	0	0	0	0	0	0	0	0	0.000164084	0	0	0	0.000228764	0	0	0	0	0	0	0	0	0	0	0	0	0	0	0	0	0	0	0	0	0	0	0	0	0	0	0	0	0
Papulaspora	0	1.47822e-05	0	0	2.92582e-05	0	1.51775e-05	0	0	0	0	0	0	0	0	0	0	1.61933e-05	0	0	0	0	0	0	0	0	0	0	0	0	0	0	0	0	0	0	0	0	0	0	0	0	0	0	0	0	0	0	0
Rhizoscyphus	0	0	0	0	0	0	0	0	0	0	0	0	0	0	0	0	0	9.71597e-05	0.000223489	0	0	0	4.21473e-05	0	0	0	0	0	0	0	0	0	0	0	0	0	0	0	0	0	1.53718e-05	0	0	0	0	0	0	0	9.30622e-05
Powellomyces	0.000122143	1.47822e-05	0	1.49009e-05	0	0	0	0.000102697	1.3836e-05	0	0	0	0	9.79651e-05	0	0	0	1.61933e-05	0.000223489	0	0	0	0	3.20729e-05	0	0	0	0	0	1.36737e-05	0.000138414	0	0	0	0	1.43221e-05	0	0	0	0.0001676	0	0	0	0	0	0	0	0	0
Clavulinopsis	0	0	0	0	0	0	0	0	0	0	0	0	0	0	0	0	0	0.000178126	0.000223489	0	0	0	0	0	0	0	0	0	0	0	0	0	0	0	0	0	0	0	0	0	0	0	0	0	0	1.52096e-05	0	0	0
Setophoma	0	0	0	0	0	0	0	0	0	0	0	0	0	0	0	0	0	4.85798e-05	0	0	0	0	0	0	0	0	0	0	0	0	0	0	0	0	0	0	0	2.84856e-05	0	0	0	3.20693e-05	0	0	1.56143e-05	0	0.000137556	9.1036e-05	0
Trichaleurina	0	0	0	0	0	0	0	0	0	0	0	0	0	0	0	0	0	0	0	0	0	0	0	0	0	0	0	0	0	0	0	0	0	0	0	4.29664e-05	0	0	0	0	0	0	0	0	0	0	0	0	0
Didymella	0	0	0	0	0	0	0	0	0	0	1.45317e-05	0	0	0	0	0	0	9.71597e-05	0	0	0	0	0	0	0	0	0	0	0	0	0	0	0	0	0	0	0	0	0	0	0	0.000128277	0	0	0	0	0	0	0.000217145
Auriculibuller	0	0	0	0	1.46291e-05	1.36171e-05	0	0	0	0	0	3.20272e-05	6.9848e-05	9.79651e-05	4.40373e-05	0	0	9.71597e-05	0	5.71911e-05	0	0.000181162	0	0	0	0	0	0	0	0	0	0	0	0	0	4.29664e-05	0	0	2.78676e-05	0	0	0	4.69381e-05	0	0	6.08384e-05	0	1.51727e-05	0
Myriococcum	0	0	0	0	0	0	0	0	0	0	0	0	0	0	0	0	0	0.000210513	0.000207525	0	0	0	0	0	4.78889e-05	0	0	0	0	0	0	0	0	0	0	0	0	0	0	0	0	0	0	0	3.12285e-05	0	0	0	0
Fusicolla	4.58036e-05	5.91287e-05	0	0.000104306	2.92582e-05	0	4.55325e-05	1.46709e-05	0	1.37406e-05	0.000145317	6.40543e-05	9.77872e-05	4.19851e-05	1.46791e-05	0	0.000155713	0.000161933	0	0.000100084	0	6.96777e-05	0	4.81093e-05	0	0	0	0	8.21839e-05	0.000123063	0	0	0	5.53434e-05	0	0.000214832	0	0	1.39338e-05	0	0	0	0	0	0	0	0	0.000121381	0
Septoria	1.52679e-05	0	2.858e-05	0	0	0	0	0	0	1.37406e-05	0	0	0	2.799e-05	4.40373e-05	0	0.000141557	3.23866e-05	0	0.000214466	0	0.000181162	0	1.60364e-05	0	0	0	0	0	0	0	0	0	1.38359e-05	0	0	0	0	1.39338e-05	0	0	0	0	0	0	0	0	0	0
Acidomyces	0	0	0	0	0	0	0	0	0	0	0	0	0	0	0	0	0	4.85798e-05	0	0	0	0	0	0	0	0	0	0	0	0	0	0	0	0	0	0	0	0	0	0	0	0	0	0	0	0	0	0	0
Phlebia	0	0	1.429e-05	0	0	0	0	0	0	0	0	1.60136e-05	0	0	0	0	0	0.000161933	0	0	0	0	0	0	0	0	0	0	0	0	1.38414e-05	1.38435e-05	0	0	0	0	8.39713e-05	0	0	0	1.53718e-05	0	0	0	0	0	0	0	0
Diatrype	0	0	0	0	0	0	0	0	0	0	0	0	0	0	0	0	0.000212335	0	0	0.00012868	0	0	1.40491e-05	0	0	0	0	0	0	0	0	0	0	0	0	0	0	0	0	0	0	0	0	0	3.12285e-05	0	3.0568e-05	0	0
Pterula	0	0	1.429e-05	0	2.92582e-05	0	0	2.93419e-05	1.3836e-05	0	1.45317e-05	0.000208177	0	1.3995e-05	0.000102754	0	0.00019818	1.61933e-05	0	2.85955e-05	0	4.18066e-05	0	0	0	0	0	0	0	0	1.38414e-05	0	1.42243e-05	0	2.77701e-05	2.86443e-05	0	1.42428e-05	0	5.58667e-05	0	0	0	0	0	0	0.000183408	0	0
Malbranchea	0	0	0	0	0	0	0	0	0	0	0.000130785	1.60136e-05	1.39696e-05	1.3995e-05	0	0	0	3.23866e-05	0	0	0	0	0	0	0	8.27278e-05	0	0	0	1.36737e-05	8.30484e-05	0.000207653	0	0	0	0	0	1.42428e-05	0	0	0	0	0	0	0	0	0	0	0
Genea	0	0	0	0	0	0	0	0	0	0	0	0	0	0	0	0	0	3.23866e-05	0.000207525	0	0	0	0	0	0	0	0	0	0	0	0	0	0	0	0	0	0	0	0	0	0	0	0	0	0	0	0	0	0
Ramariopsis	0	0	0	0	0	0	0	0	0	0	0	0	0	0	0	0	0	3.23866e-05	1.59635e-05	0	0	0	0	0	0.000207519	0	0	0	0	0	0	0	0	0	0	0	0	0	0	0	0	0	3.1292e-05	0	0	0	0	0	0
Musicillium	0	0	1.429e-05	1.49009e-05	0.000102404	0	0.000136598	0	0	0	0	0	0	0	0.000117433	0	0	0	0	0	0	0	0	0	0	0	0	0	0	0	0	0	0	0	0	0	0	0	0	0	0	0	0	0	0	0	0	0	0
Coniocessia	0	0	0	0	0	0	0	0	0	0	0	0	0	0	0	0	0	0	0	0	0	0	0	0	0	0	0	0	0	0	0	0	0	0	0	0	0	0	0	0	0	0	0	0	0	0	0	0	0
Gaeumannomyces	0	0	0	0	0	0	0	0	0	0	0	0	0	0	0	0	0	4.85798e-05	0	0	0	0	0	0	0	0	0	0	0	0	0	0	0	0	0	0	0	0	0	0	1.53718e-05	0	0	0	0	0	0	0	0
Capnobotryella	0	0	0	0	0	0	0	0	0	0	0	0	0	0	0	0	0	0	0	0	0	0	0	0	0	0	0	0	0	0	0	0	0	0	0	0	0	0	0	0	0	0	0	0	0	0	0	0	0
Ramularia	1.52679e-05	0	0	0	2.92582e-05	0	4.55325e-05	0	0	1.37406e-05	0	1.60136e-05	1.39696e-05	0	0	0	0	0	6.38539e-05	0.000200169	0	4.18066e-05	0	1.60364e-05	0	0	0	0	0	0	0	0	0	1.38359e-05	0	1.43221e-05	0	1.42428e-05	0	0	0	0	0	0	0	0	0	0	0
Gymnoascus	0	0	0	0	0	0	0	0	0	0	0	0	0	1.3995e-05	0	0	0	0	0	0.000200169	0	0	0	0	0	0	0	0	0	4.10212e-05	0	0	0	0	0	1.43221e-05	0	1.42428e-05	0	0	4.61155e-05	0	0	0	0	0	0	0	0
Veronaea	0	0	0	0	0	0	0	0	0	0	0	0	0	0	0	0	0	0	0	0	0	0	0	0	0	0	0	0	0	0	0	0	0	0	0	0	0	0	0	0	0	0	0	0	0	0	0	0	0
Phanerochaete	0	0	0	0	0	1.36171e-05	3.0355e-05	0	0	0	0	0	0.000111757	2.799e-05	0	0	0	0	0.000143671	0	0	4.18066e-05	0	0	0	0	0	0	0	0	0	1.38435e-05	0	0	0	1.43221e-05	0	0	0	2.79334e-05	0	0	0	0	0	0	0	0	0
Myriodontium	0	0	0	0	0	0	0	0	0	0	0	0	0	0	0	0	0	0.000194319	0	0	0	0	0	0	0	0	0	0	0	0	0	0	0	0	0	0	0	0	0	0	3.07437e-05	0	0	0	0	0	0	0	0
Physisporinus	0	0	0	0	0	0	0	0	0	0	0	0	0	0	0	0	0	0	0	0	0	0	0	0	0	0	0	0	0	0	0	0	0	0	0	0	0	0	0	0	0	0	0	0	0	0	0	0	0
Daldinia	0	0	0	0	0	1.36171e-05	0	4.40128e-05	0	0	0	3.20272e-05	6.9848e-05	2.799e-05	0	0	0	0	0	0	0	0	0	0	0	0	0	0	0	0	0	0	0	1.38359e-05	0	0	0	1.42428e-05	1.39338e-05	0	0	0	0	0	0	0	0	0	0
Meliniomyces	0	0	0	0	0	0	0	0	0	0	0	0	0	0	0	0	0	6.47731e-05	0.000191562	0	0	0	0	0	0	0	0	0	0	0	0	0	0	0	0	0	0	0	0	0	0	1.60346e-05	0	0	0	0	0	0	0
Flammulina	0	0	0	0	0	0	0	0	0	0	0	0	2.79392e-05	0	0	0	0	0.000129546	0.000191562	0	0	0	0	1.60364e-05	0	0	0	0	0	0	0	0	0	0	0	0	0	0	0	0	0	0	0	7.90989e-05	0	0	0	0	0
Diaporthe	0	0	0	0	2.92582e-05	0	1.51775e-05	0	2.76721e-05	0	4.35951e-05	0	2.79392e-05	5.59801e-05	1.46791e-05	0	0	0.000178126	0.000191562	0	0	0	0	0	0	4.13639e-05	0	0	0	0	4.15242e-05	1.38435e-05	0	0	0	5.72885e-05	0	1.42428e-05	1.39338e-05	0	4.61155e-05	0	4.69381e-05	4.74593e-05	0	0	0	0	0
Sistotremastrum	0	0	0	0	0	0	0	0	0	0	0	0	0	0	0	0	0	0	0	0	0	0	0	0	0	0	0	0	0	0	1.38414e-05	0	0	0	0	0	0	0	0	0	0	0	0	0	1.56143e-05	0	0	0	0
Macrophomina	0	0	0	0	0	0	0	0	0	0	0	1.60136e-05	0	0	0	0	0	0	0	0	0	0	0.000182638	0	0	0	0	0	0	0	0	0	0	0	0	0	2.79904e-05	0	0	0	0	0	0	0	0	0	0	0	0
Botryosphaeria	0	0	0	0	0	0	0	0	0	0	0	0	0	0	0	0	0	0	0	0	0	0	0	0	0	0	0	0	0	0	0	0	0	0	0	0	0	0	0	0	0	1.60346e-05	0	0	0	0	0	4.5518e-05	0
Tritirachium	0	0	0	0	0	0	0	0	0	0	0	0	0	0	0	0	0	0	0	0	0	0	0	0	0	0	0	0	0	0	0	0	0	0	0	0	0	0	0	0	0	0	0	0	0	0	0	0	0
Trichothecium	6.10715e-05	0.000118257	8.574e-05	5.96036e-05	2.92582e-05	9.53198e-05	4.55325e-05	0	0	5.49624e-05	0	4.80407e-05	0	0	1.46791e-05	0	8.49341e-05	6.47731e-05	9.57809e-05	0	0	0.000139355	0	0	0	0	0	0	0	0	0	0	0	0	1.3885e-05	0	0.000181938	0	0	0	0	1.60346e-05	0	0	0	0	0	0	0
Cyrenella	0	0	0	0	0	0	0	0	0	2.74812e-05	0	0	0	0	0	0	0	0	0	0	0	0	0	0	0	0	0	0	0	0	0	0	2.84487e-05	0	0	0	0	0	0	0	0	0	0	0	0	0	0	0	0
Rhodosporidium	0	4.43466e-05	0	2.98018e-05	7.31454e-05	4.08513e-05	1.51775e-05	1.46709e-05	0	2.74812e-05	5.81269e-05	1.60136e-05	0.000111757	1.3995e-05	1.46791e-05	4.47501e-05	4.24671e-05	6.47731e-05	0	0.000100084	1.41983e-05	0.000181162	0	4.81093e-05	0.000127704	4.13639e-05	1.36758e-05	0	5.47893e-05	0	0	1.38435e-05	0	2.76717e-05	0	2.86443e-05	0	5.69711e-05	0	2.79334e-05	0	0.000128277	0	0	0	0	0	0	0
Catenophlyctis	0	0	0	0	0	0	0	0	0	0	0	0	0	0	0	0	0	0	0	0	0	0	0	0	0	0	0	0	0	0	0	0	0	0	0	0	0	0	0	0	0	0	0	0	0	0	0	0	0
Dictyophora	0	0	0	0	0	0	0	0	0	0	0	0	0	0	0	0	0	0	0	0	0	0	1.40491e-05	0	0	4.13639e-05	0	1.38464e-05	0	0	0	0	0	0	0	0	1.39952e-05	0.000113942	2.78676e-05	0	0	0	1.5646e-05	0	0	0	0	0	0
Clavariadelphus	0	0	0	0	0	0	0	0	0	0	0	0	0	0	0	0	0	0.000178126	0	0	0	0	0	0	0	0	0	0	0	0	0	0	0	0	0	0	0	0	0	0	0	0	0	0	0	0	0	0	0
Wardomycopsis	0	0	1.429e-05	0	0	0	0	0	0	0	0	0	0	0	2.93582e-05	0	0	0	0.000175598	0	0	0	0	0	0	0	0	0	0	0	0	0	0	0	0	0	0	0	0	0	0	0	0	0	0	0	0	0	0
Trichophaea	0	0	0	0	0	0	0	0	0	0	0	0	0	0	0	0	0	0.000161933	0.000175598	0	0	0	0	0	0	0	0	0	0	0	0	0	0	0	0	0	0	0	0	0	0	0	0	0	0	0	0	4.5518e-05	0
Cylindrosympodium	0	0	0	0	0	0	0	0	0	0	0	0	0	0	0	0	0	0	0.000175598	0	0	0	0	0	0	0	0	0	0	0	0	0	0	0	0	0	0	0	0	0	0	0	0	0	0	0	0	0	0
Catenaria	0	0	0	0	0	0	0	0	0	0	0	0	0	0	0	0	0	6.47731e-05	0	0	0	0	0	0	0	0	0	0	0	0	0	0	0	0	0	0	0	0	0	0	0	0	0	0	0	0	0	0	7.75518e-05
Amphinema	0	0	0	0	0	0	0	0	0	0	0	0	0	0	0	0	0	0.000161933	0	0	0	0	0	0	0	0	0	0	0	0	0	0	0	0	0	0	0	0	0	0	0	0	0	0	0	0	0	1.51727e-05	0.000139593
Kondoa	0	0	0	0	0	0	0	0	0	0	0	0	0	0	0	0	0	0	0	0	0	0	0	0	0	0	0	0	0	0	0	0	0	0	0	0	0	0	0	0	0	0	0	0	0	0	0	0	0
Laetisaria	1.52679e-05	0	0	0	0	0	0	0	0	1.37406e-05	0	1.60136e-05	5.58784e-05	0	5.87165e-05	0	5.66227e-05	0	0	0	1.41983e-05	9.75487e-05	0	0	0	0	0	0	0	0	0	0	1.42243e-05	0	0	0.000171866	0	0	1.39338e-05	0	0	0	0	0	0	0	0	0	0
Amaurodon	0	0	0	0	1.46291e-05	0	0.00012142	0	1.3836e-05	0	0	0	2.79392e-05	0	0	0	0	0	0	0.000171573	0	0	2.80982e-05	0	0	0	0	0	0	0	0	0	0	0	0	0	0	0	0	0	0	0	0	0	0	0	0	0	0
Ustilago	0	0	0	0	0	0	1.51775e-05	0	0	0	0	0	2.79392e-05	1.3995e-05	2.93582e-05	0	0	0.000113353	0	0.000171573	1.41983e-05	6.96777e-05	0	1.60364e-05	1.5963e-05	1.3788e-05	0	0	0	4.10212e-05	0	0	0	0	0	5.72885e-05	0	0	0	0	0	0	0	0	0	0	0	0	0
Volvariella	0	0	2.858e-05	0	0	0	0	0	0	0	4.35951e-05	0	1.39696e-05	0	0	7.45835e-05	0	6.47731e-05	0.000111744	0.000171573	0	0	0	0	0	0	0	0	0	0	0	0	0	0	0	0	0	0	0	0	0	0	0	0	0	0	0	0	0
Neofusicoccum	0	0	0	0	0	0	0	0	0	0	0	0	0	0	0	0	0	0	0	0	0	0	0	0	0	0	0	0	0	0	0	0	0	0	0	0	0	0	0	0	1.53718e-05	0	0	0	0	0	0	0	0.000170614
Kabatiella	6.10715e-05	8.86931e-05	0	0	0	0	0	0	0	0	0	0	0	0	0.000102754	0.000104417	0	0	0.000111744	0	0	0	0	0	0	0	1.36758e-05	0	0	0	0	0	0	0	0	0	0	0	8.36027e-05	0	0	0	0	0	0	0	0	0	0.000170614
Tubakia	0	0	0	0	0	0	0	0	0	0	0	0	0	0	0	0	0	0	0	0	0	0	0	0	0	0	0	0	0	0	0	0	0	0	0	0	0	0	0	0	0	0	0	0	0	0	0	0.000106209	0
Stenella	0	0	0	0	0	0	0	0	0	0	4.35951e-05	0	0	0	0	0	0	0	0	0.000142978	0	0	0	0	0	0	0	0	0	0	0	0	0	0	0	0	0	1.42428e-05	1.39338e-05	0	0	0	0	0	0	0	3.0568e-05	0	0
Hymenogaster	0	0	0	0	0	0	0	0	0	0	0	0	0	0	0	0	0	0.000161933	7.98174e-05	0	0	0	0	0	0	0	0	0	0	0	0	0	0	0	0	0	0	0	0	0	1.53718e-05	0	3.1292e-05	9.49187e-05	0	6.08384e-05	0	0	0
Setosphaeria	0	0	0	0	0	0	0	0	0	0	0	0	0	0	0	0	0	0	0	0	0	0	0	0	0	0	0	0	0	0	0	0	0	0	0	0	0	0	0	0	0	0	0	0	0	0	0	0	0
Sporidiobolus	0	0	0	0	0	0	0	0	0	0	0	0	0	0	0	0	0	0	1.59635e-05	0	0	1.39355e-05	0	0	0	0	0	1.38464e-05	0	0	0	0	0	0	0	0	0	2.84856e-05	1.39338e-05	9.77667e-05	0	0	0	1.58198e-05	0	0	0	0	0
Actinomucor	0	0	0	0	0	0	0	0	0	0	0	0	0	0	0	0	0	0	0	0	0	0	0	0	0	0	0	0	0	0	0	0	0	0	0	0	0	0	0	0	0	0	0	0	0	0	0	0	0
Ambispora	0	0	0	0	0	0	0	0	0	0	1.45317e-05	0	2.79392e-05	0	0	0.000164084	0	0	0	0	0	0	0	3.20729e-05	0	0	0	0	0	0	0	0	0	0	0	0	0	1.42428e-05	1.39338e-05	0	0	0	0	0	0	0	0	0	0
Rhizomucor	0	0	0	0	0	0	0	0	0	0	0	0	0	0	0	0	0	0.000161933	0	0	0	0	0	0	9.57778e-05	0	0	0	0	0	0	0	0	0	0	0	0	0	0	0	0	0	0	0	0	0	0	0	0
Ophiocordyceps	0	0	0	1.49009e-05	0	0	0	0	0	1.37406e-05	0	0	1.39696e-05	0	0	0	0	0	0.000127708	0	0	0	0	0	0	0	0	0	0	0	0	0	0	0	0	0	0	0	0	0	0	0	0	0	0	0	0	0	0
Neobulgaria	1.52679e-05	0	0	0	1.46291e-05	0	4.55325e-05	0	1.3836e-05	6.8703e-05	1.45317e-05	0.000160136	0.000125726	8.39701e-05	1.46791e-05	0	0.000113245	0	0	0	2.83966e-05	4.18066e-05	1.40491e-05	3.20729e-05	0	1.3788e-05	1.36758e-05	1.38464e-05	2.73946e-05	9.5716e-05	0	0	4.2673e-05	1.38359e-05	2.77701e-05	7.16107e-05	1.39952e-05	4.27283e-05	1.39338e-05	0	0	0	0	0	0	0	0	0	0
Phaeangium	0	0	0	0	0	0	0	0	0	0	0	0	0	0	0	0	0	0	0.000159635	0	0	0	0	0	0	0	0	0	0	0	0	0	0	0	0	0	0	0	0	0	0	0	0	0	0	0	0	0	0
Phellinidium	0	0	0	0	0	0	0	0	0	0	0	0	0	0	0	0	0	1.61933e-05	0.000159635	0	0	0	0	0	0	0	0	0	0	0	0	0	0	0	0	0	0	0	0	0	0	0	0	0	0	0	0	0	0
Boletus	0	0	0	1.49009e-05	0	0	0	0	0	0	2.90634e-05	0	0	0	0	0	0	3.23866e-05	0	0	0	0	0	0	0	0	0	0	0	0	0	0	0	0	0	0	0	0	1.39338e-05	0	0	0	0	0	0	0	0	0	0
Heterochaete	0	0	0	0	0	0	0	1.46709e-05	0	0	0.000145317	0	0	0	0	0	0	0	0	0	0	0	0	0	0	0	0	0	0	0	0	0	0	0	0	0	0	0	0	0	9.22311e-05	0	0	0	0	0	0	0	0
Meira	0	0	0	0	0	0	0	0	0	0	0	0	0	0	0	0	0	3.23866e-05	9.57809e-05	0	0	0	0	0	0	0	0	0	0	1.36737e-05	0	0	0	0	0	0	0	0	0	0	0	0	0.00015646	1.58198e-05	0	0	0	0	6.20415e-05
Aporospora	0	0	0	0	0	0	0	0	0	0	0	0	0	0	0	0	0	1.61933e-05	6.38539e-05	0	0	0	0	0	0	0	0	0	0	0	0	0	0	0	0	0	0	0	0	0	0	0	0.00015646	0	0	0	0	0	0
Terfezia	1.52679e-05	0	0	0	0	0	4.55325e-05	0	0	0	0	3.20272e-05	0	4.19851e-05	1.46791e-05	0	0	0	0	0	0	1.39355e-05	0	0	0	1.3788e-05	0	0	1.36973e-05	0	0	1.38435e-05	0	0	0	4.29664e-05	0	4.27283e-05	0	0	1.53718e-05	1.60346e-05	3.1292e-05	0	0	6.08384e-05	0	0	0
Oliveonia	0	0	0	0	0	0	0	0	0	0	0	0	0	0	0	0	0	0	0	0	0	0	0	0	0	0	0	0	0	0	0	0	0	0	0	0	0	0	0	0	0	0	0	0	0	0	0	0	0
Cylindrocladiella	0	0	0	0	0	0	1.51775e-05	0	0	0	0	0	0	0	0	0	0	0	3.1927e-05	0	0	0	1.40491e-05	0	0	0	0	0	0	0	0	0	0	0	0	0	0	0	0	0	7.68592e-05	0	0	0	4.68428e-05	0	0	0	0
Parascedosporium	0	0	0	0	0	0	0	0	0	0	0	0	0	0	1.46791e-05	0.000149167	0	0	0	0	0	0	0	0	0	0	0	0	0	0	0	0	0	0	0	1.43221e-05	0	1.42428e-05	0	0	0	0	0	0	4.68428e-05	0	0	0	0
Pholiota	0	0	0	0	0	0	0	0	0	0	0	0	4.19088e-05	0	0	0	0	0.00014574	7.98174e-05	0	0	2.78711e-05	0	0	0	0	0	0	0	0	0	0	0	0	0	0	0	0	0	0	0	0	0	0	0	0	0	0	0
Phyllosticta	0	0	0	1.49009e-05	0	0	0	4.40128e-05	0	0	0	0	0	0	0	0	0	0.00014574	3.1927e-05	0	0	0	0	0	0.000111741	0	0	0	0	0	0	0	1.42243e-05	0	0	0	0	0	0	0	1.53718e-05	0	0	0	0	7.60479e-05	0	3.03453e-05	0
Dictyochaeta	0	0	1.429e-05	0	0	0	0	0	0	0	0	0	0	0	0	0	0	1.61933e-05	0	0	0	0	0	0	0	0	0	0	0	0	0	0	0	0	0	0	0	0	0	0	4.61155e-05	0	0	0	0	0	0	0	0
Elsinoe	0	0	0	0	0	0	0	0	0	0	0	0	0	0	0	0	0	0	0	0	0	0	0	0	0	0	0	0	0	0	0	0	0	0	0	0	0	0	0	0	0	0	0	0	0	0	0	0	0
Corticium	0	0	0	0	0	0	0	0	0	0	0	0	0	0	0	0	0	0	0	0	0	0	0	0	0	0	0	0	0	0	0	0	0	0	0	0	0	0	0	0	0	0	0	0	0	0	0	0	0
Waitea	0	0	1.429e-05	0	0	0	0	0	0	0	0	1.60136e-05	0	2.799e-05	0	0	8.49341e-05	0	0	1.42978e-05	0	4.18066e-05	0	0	0	0	0	0	0	2.73474e-05	0	0	0	0	0	0.000143221	0	1.42428e-05	0	0	0	0	0	0	0	0	0	0	0
Geosmithia	0	0	0	0	2.92582e-05	0	0	0	0	0	0	0	1.39696e-05	0	0	0	0	1.61933e-05	0	0.000142978	0	1.39355e-05	0	0	0	0	0	0	0	0	0	0	0	0	0	0	0	0	0	0	0	0	0	0	0	0	0	0	7.75518e-05
Biscogniauxia	0	0	0	0	0	0	0	0	0	0	0	0	0	0	0	0	0.000141557	8.09664e-05	0	0	0	0	4.21473e-05	0	0	0	0	0	0	0	0	0	0	0	0	0	0	0	0	0	0	0	0	0	0	0	0	0	0
Camarosporium	0	0	0	0	0	0	0	0	0	0	2.90634e-05	0	0	0	0	0	0	0	0	0	0	0	0	0	0	0	0	0	0	0	0	0	0	0	0	0	0	0	0	0	0	0	0	0	0	0	0	0	0
Xenobotryosphaeria	0	0	0	0	0	0	0	0	0	0	0	0	0	0	0	0	0	3.23866e-05	1.59635e-05	0	0	0	0	0	0	0	0	0	0	0	0	0	0	0	0	0	0	0	0	0	0	8.01732e-05	0	0	0	0	0	0	0
Cunninghamella	0	0	0	0	0	0	0	0	0	0	0	0	0	0	0	2.98334e-05	0	0	3.1927e-05	4.28933e-05	0	0	0	0	0.000127704	0	0	0	0	0	0	0	0	0	0	0	0	0	0	0	0	0	0	0	0	0	0	0	0
Phomopsis	0	0	0	0	0	0	0	5.86837e-05	0	0	0	0	0	0	0	0	0	0	0	0	0	0	0	0	0	0	0	0	0	0	0	0	0	0	0	0	0	0	0	0	0	0	0	0	0	0	0	0	0.000139593
Lichtheimia	0	0	0	0	0	0	0	0	0	0	0	0	0	0	0	0	0	0	0	0	0	0	0	0	4.78889e-05	0	0	0	0	0	0	0	0	0	0	0	0	0	0	0	0	0	0	0	0	0	0	0	0
Cryptosporiopsis	0	0.000103475	0	0	0	0	0.000136598	0	0	1.37406e-05	0	1.60136e-05	0	1.3995e-05	0	0	0	3.23866e-05	0	0	0	0	1.40491e-05	0	0	0	0	0	0	0	0	0	0	0	0	0	0	0	0	0	0	0	0	0	0	0	0	0	0
Hohenbuehelia	0	0	0	0	0	0	0	0	0	0	0	0	0	0	0	0	0	0	0	0	0	0	0	0	0	0	0	0	0	0	0	0	0	0	0	0	0	0	0	0	0	0	0	0	0	0	0	0	0
Tilletiopsis	0	0	0	0	0	0	0	0	0	0	0	0	0	0	0	0	0	0	0	0	0	0	0	0	0	0	0	0	0	0	0	0	0	0	0	0	0	0	0	0	0	0	0	0	0	0	0	0	0
Dendryphion	0	2.95644e-05	0	0	5.85163e-05	0	9.1065e-05	0	0	0	0	1.60136e-05	0	2.799e-05	0	0.00013425	0	1.61933e-05	0	4.28933e-05	0	1.39355e-05	0	0	0	0	0	0	0	4.10212e-05	0	0	0	0	1.3885e-05	4.29664e-05	0	0	0	0	0	0	0	0	0	0	0	0	0
Tilletia	1.52679e-05	2.95644e-05	0	0	1.46291e-05	0	0	0	0	0	1.45317e-05	0	2.79392e-05	2.799e-05	0	0	0	0	0	0	0	0	1.40491e-05	0	0	0	0	0	0	0	0	0	0	2.76717e-05	0	1.43221e-05	1.39952e-05	1.42428e-05	0	0	0	3.20693e-05	0	0	0	0	0	0	0
Arachnopeziza	0	0	0	0	0	0	0	0	0	0	0	0	0	0	0	0	0	0.000129546	0	0	0	0	0	0	0	0	0	0	0	0	0	0	0	0	0	0	0	0	0	0	0	0	0	0	0	0	0	0	0
Cystolepiota	0	0	0	0	0	0	0	0	0	0	0	0	0	0	0	0	0	0.000129546	0	0	0	0	0	0	0	0	0	0	0	0	0	0	0	0	0	0	0	0	0	0	0	0	0	0	0	0	0	0	0
Calonectria	0	0	0	0	0	0	0	0	0	0	0	0	0	0	0	0	0	0.000129546	0	0	0	0	0	0	0	0	0	0	0	0	0	0	0	0	0	0	0	0	0	0	0	0	0	0	0	0	0	0	0
Leptodontidium	0	0	0	0	0	0	0	0	0	0	0	0	0	0	0	0	0	0.000129546	6.38539e-05	0	0	0	0	0	0	0	0	0	0	0	0	0	0	0	0	0	0	0	0	0	0	0	0	0	0	0	0	0	0
Graphium	1.52679e-05	0	0	0	0	5.44685e-05	0	5.86837e-05	0	1.37406e-05	0	0.000112095	0	0.00011196	4.40373e-05	0.000119334	0	0	0	7.14888e-05	0	1.39355e-05	0	3.20729e-05	0	0	0	0	0	0	0	2.7687e-05	2.84487e-05	0	0	0.000128899	0	0	0	0	0	0	0	0	0	0	0	0	0
Trichophyton	0	0	0	0	0	0	0	0	0	0	0	0	1.39696e-05	0	2.93582e-05	0	0	0	0	1.42978e-05	0	2.78711e-05	0	0	0	1.3788e-05	0	0	0	0	0	0	0	0	0	0.000128899	0	0	0	0	0	0	0	0	0	0	0	0	0
Naemacyclus	0	0	0	0	0	0	0	0	0	0	0	0	0	0	0	0	0	0	0	0	0	0	0	0	0	0	0	0	0	0	0	0	0	0	0	0	0	0	0	0	0	0	0	0	0	0	0	0	0
Cylindrotrichum	0	0	0	0	0	0	0	0	0	0	0	0	0	0	0	0	0	0	0.000127708	0	0	0	0	0	0	0	0	0	0	0	0	0	0	0	0	0	0	0	0	0	0	0	0	0	0	0	0	0	0
Phaeoclavulina	0	0	0	0	0	0	0	0	0	0	0	0	0	0	0	0	0	8.09664e-05	0	0	0	0	0	0	0	0	0	0	0	0	0	0	0	0	0	0	0	0	0	0	0	0	0	0	0	0	0	0	0
Didymosphaeria	0	0	0	0	0	0	0	0	0	0	0	0	0	0	0	0	0.000127401	4.85798e-05	0	0	0	0	0	0	0	0	0	0	0	0	0	0	0	0	0	0	0	0	0	0	0	0	0	0	0	0	0	0	0
Blastobotrys	0	1.47822e-05	0	0	0	0	0	0	0	0	0	1.60136e-05	1.39696e-05	0	0	0	0.000127401	0	0	4.28933e-05	0	0	7.02454e-05	0	0	0	0	0	0	0	0	0	0	0	0	0	5.59809e-05	1.42428e-05	0	0	0	0	0	0	0	0	0	0	0
Eutypa	0	0	0	0	0	0	0	0	0	0	0	0	0	2.799e-05	2.93582e-05	0	0	0	0	0	0	0	0	0	0	0	0	0	0	0	0	0	0	0	0	0	0	4.27283e-05	0	0	0	0	0	0	0	0	0	0	0
Pisolithus	0	0	0	0	0	0	1.51775e-05	0	5.53442e-05	0	0	6.40543e-05	0	0.000125955	4.40373e-05	0	0	0	0	1.42978e-05	0	0	0	0	0	0	1.36758e-05	0	0	0	1.38414e-05	0	0	0	0	0	0	0	0	0	0	0	0	0	0	0	0	0	0
Pseudoveronaea	0	0	0	0	0	0	0	0	0	0	0	0	0	0	0	0	0	0	0	0	0	0	2.80982e-05	0	0	0	0	0	0	0	0	0	0	0	0	0	0	0	0	0	0	0	0	0	0	0	0	0	0
Irpex	0	0	0	1.49009e-05	2.92582e-05	1.36171e-05	1.51775e-05	0	1.3836e-05	0	0	1.60136e-05	0	4.19851e-05	1.46791e-05	0	5.66227e-05	0	0	5.71911e-05	0	0.00012542	0	3.20729e-05	0	0	0	0	1.36973e-05	0	1.38414e-05	0	0	0	0	0	0	0	1.39338e-05	0	0	0	0	0	0	0	0	0	0
Kendrickiella	3.05357e-05	0	1.429e-05	2.98018e-05	1.46291e-05	0	0	0	4.15081e-05	0	1.45317e-05	0	0	0	0	0	0	0	0	0	1.41983e-05	0.00012542	0	9.62186e-05	0	0	0	0	0	0	0	0	0	0	0	5.72885e-05	4.19856e-05	0	1.39338e-05	6.98334e-05	0	0	0	0	0	0	0	0	0
Dactylaria	0	0	0	0	0	0	0	0	0	0	0	0	0	0	0	0	0	0	0	0	0	6.96777e-05	0	0	0	0	0	0	0	0	0	0	0	0	0	0	0	0	0	0	0	0	0	0	0	0	0	0	0
Fomitopsis	0	0	0	0	0	0	0	0	0	0	0	0	0	0	0	0	0	3.23866e-05	0	0	0	0	0	0	0	0	0	0	0	0	0	0	0	0	0	0	0	0	0	0	3.07437e-05	0	0	0	0	0	0	0	0.000124083
Acaromyces	0	0	0	0	1.46291e-05	0	0	0	0	0	0	0	0	2.799e-05	0	0	0	4.85798e-05	0	0	0	0	0	0	4.78889e-05	0	0	0	0	0	0	0	0	0	0	0	0	0	0	0	1.53718e-05	0	0	0	0	0	0	0	0
Myriangium	0	0	0	0	0	0	0	0	0	0	0	0	0	0	0	0	0	9.71597e-05	0	0	0	0	0	0	0	0	0	0	0	0	0	0	0	0	0	0	0	0	0	0	9.22311e-05	0	0	0	0	0	0.000106988	0.000121381	0
Septoglomus	0	0	0	0	0	0	0	0	0	0	0	0	0	0	0	0	0	6.47731e-05	0	0	0	0	0	0	0	0	0	0	0	0	0	0	0	0	0	0	0	0	0	0	0	0	0	0	0	0	3.0568e-05	0	0
Ascotricha	0	0	0	0	0	0	0	0	0	0	0	0	0	0	0	0	0	0	0	0	0	0	0	0	0	0	0	0	0	0	0	0	0	0	0	0	0	0	0	0	0	0	0	0	0	0	0	0	0
Physcia	0	0	0	0	0	0	0	0	0	0	0	0	0	0	0	0	0	0	0	0	0	0	0	0	0	0	0	0	0	0	0	0	0	0	0	0	0	0	0	0	0	0	0	0	0	0	0	0	0
Debaryomyces	0	0	0	0	0	0	0	0	0	0	0	0	0	0	0	0	0	6.47731e-05	0	7.14888e-05	0	1.39355e-05	0	0	0	0	0	0	0	0	0	0	0	0	0	0	0	0	0	0	0	0	0	0	3.12285e-05	9.12575e-05	0	0	0
Naucoria	0	0	0	0	0	0	0	0	0	0	0	0	0	0	0	0	0	0.000113353	0	0	0	0	0	0	0	0	0	0	0	0	0	0	0	0	0	0	0	0	0	0	0	0	0	0	0	0	0	0	1.55104e-05
Curreya	0	0	0	0	0	0	0	0	0	0	0	0	0	2.799e-05	1.46791e-05	5.96668e-05	0	0.000113353	0	0	0	1.39355e-05	0	3.20729e-05	0	0	0	0	0	0	0	0	0	0	0	0	0	0	0	0	0	0	0	0	0	0	0	0	0
Pluteus	0	0	0	0	2.92582e-05	0	0	0	1.3836e-05	0	0	6.40543e-05	0	0	0	0	0	0	0	0	5.67932e-05	8.36132e-05	0	0	0	0	0	0	0	0	0	0	0	0	0	0	0.000111962	0	0	0	0	0	0	0	0	0	0	0	0
Lepiota	0	0	0	0	0	0	0	0	0	0	0	0	0	0.00011196	0	0	4.24671e-05	0	0	0	0	0	0	0	0	0	0	0	0	0	0	0	0	0	0	0	0	0	0	0	0	0	0	0	0	0	0	0	0
Angulomyces	0	0	0	0	0	0	0	0	0	0	0	0	0	0	0	0	0	0	0.000111744	0	0	0	0	0	0	0	0	0	0	0	0	0	0	0	0	0	0	0	0	0	0	0	0	0	0	0	0	0	0
Kavinia	0	0	0	0	0	0	0	0	0	0	0	0	0	0	0	0	0	0	0.000111744	0	0	0	0	0	0	0	0	0	0	0	0	0	0	0	0	0	0	0	0	0	0	0	0	0	0	0	0	0	0
Scleroconidioma	0	0	0	0	0	0	0	0	0	0	0	0	0	0	0	0	0	1.61933e-05	0.000111744	0	0	0	0	0	0	0	0	0	0	0	0	0	0	0	0	0	0	0	0	0	0	0	0	0	0	0	0	0	0
Piriformospora	1.52679e-05	0	2.858e-05	1.49009e-05	0	0	0	0	0	6.8703e-05	0	0	0	0	0	0	0	0	0.000111744	0	0	0	2.80982e-05	0	0	0	0	0	0	4.10212e-05	0	0	0	0	0	0	0	0	0	0	0	6.41385e-05	0	0	0	0	0	0	0
Eocronartium	0	0	0	0	0	0	0	0	0	0	0	0	0	0	0	0	0	0	0	0	0	0	0	0	0	0	0	0	0	0	0	0	0	0	0	0	0	0	0	0	0	0	0	0	0	0	0	0	0
Serendipita	0	0	0	0	0	0	0	0	0	0	0	0	0	0	0	0	0	0	0	0	0	0.000111484	0	0	0	0	0	0	0	0	0	0	0	0	0	0	0	0	0	0	0	0	0	0	0	0	0	0	0
Microbotryozyma	0	0	0	0	0	0	0	0	0	0	0	0	0	0	0	0	0	0	0	0	0	0	0	0	0	1.3788e-05	0	0	0	0	0	0	1.42243e-05	0	0	4.29664e-05	0	0	1.39338e-05	4.19e-05	0	0	0	0.000110738	0	0	0	0	0
Geomyces	0	0	0	0	0	0	0	0	0	0	0	0	0	0	0	0	0	0	0	0	0	0	0	0	0	0	0	0	0	0	0	0	0	0	0	0	0	0	0	0	0	0	0	0	0	0	0	0	0
Oedocephalum	0	0	0	0	0	0	0	0	0	0	0	0	0	0	0	0	0	1.61933e-05	7.98174e-05	0	0	0	0	0	0	0	0	0	0	0	0	0	0	0	0	0	0	0	0	0	0	0	0	0	0	0	0	0	0
Magnusiomyces	0	0	0	0	0	0	0	1.46709e-05	0	1.37406e-05	0	0	0	0	0	0	5.66227e-05	0	0	0	0	0	0	0	0	0	0	0	0	0	0	1.38435e-05	0	0	0	0	0	0	0	0	0	0	0	0	0	0	0	0	0
Eriosporella	0	0	0	0	0	0	0	0	0	2.74812e-05	0	0	0	0	0	0	0	3.23866e-05	0	0	0	0	0	0	0	0	0	0	0	0	0	0	0	0	0	0	0	0	0	0	0	0	0	0	0	0	0	0	0
Calvatia	0	0	0	0	0	1.36171e-05	0	0	0	0	0	0	0	2.799e-05	0	0	0	0	0	0	0	0	7.02454e-05	0	0	0	2.73515e-05	0	0	2.73474e-05	0	0	1.42243e-05	0	2.77701e-05	0	0	0	0	0	0	0	0	0	0	0	0	0	0
Nematoctonus	0	0	0	0	0	0	3.0355e-05	0	1.3836e-05	1.37406e-05	0	0	0	1.3995e-05	4.40373e-05	4.47501e-05	0	0	0	0	0	4.18066e-05	0	0	0	0	0	0	0	1.36737e-05	0	0	0	0	0	0.000100255	0	0	1.39338e-05	0	0	0	0	0	0	0	0	0	0
Solheimia	0	0	0	0	0	0	0	0	0	0	0	0	0	0	0	0	0	0	0	0	0	0	0	0	0	0	0	0	0	0	0	0	0	0	0	0	0	0	0	0	0	0	0	0	0	0	0	0	0
Ramophialophora	0	0	0	0	2.92582e-05	0	0	0	0	0	0	0	1.39696e-05	6.99751e-05	1.46791e-05	0	0	0	0	0	0	5.57421e-05	0	1.60364e-05	0	2.75759e-05	0	0	0	1.36737e-05	0	0	0	0	0	1.43221e-05	1.39952e-05	9.96995e-05	0	0	0	0	0	0	0	0	0	0	0
Calceomyces	4.58036e-05	0	0	0	0	0	0	1.46709e-05	0	0	0	0	0	2.799e-05	0	0	0	0	0	0	7.09915e-05	0	2.80982e-05	0	0	0	0	0	0	0	0	1.38435e-05	0	0	1.3885e-05	1.43221e-05	2.79904e-05	9.96995e-05	1.39338e-05	0	0	0	0	0	0	0	0	0	0
Serpula	0	0	4.287e-05	0	0	0	0	0	0	0	2.90634e-05	8.00679e-05	6.9848e-05	1.3995e-05	0	0	0	0	0	0	9.93881e-05	0	0	0	0	0	0	1.38464e-05	0	2.73474e-05	1.38414e-05	0	0	2.76717e-05	0	0	2.79904e-05	1.42428e-05	0	0	0	0	4.69381e-05	0	0	0	0	0	0
Anguillospora	0	0	0	0	0	0	0	0	0	1.37406e-05	0	3.20272e-05	0	0	0	0	9.90898e-05	0	0	0	0	0	0	0	0	0	0	0	0	0	0	0	0	0	0	0	0	0	0	0	0	0	0	0	0	0	0	0	0
Leucosporidiella	1.52679e-05	0	8.574e-05	1.49009e-05	0	0	0	0	0	4.12218e-05	0	4.80407e-05	9.77872e-05	6.99751e-05	1.46791e-05	0	9.90898e-05	0	0	0	0	1.39355e-05	0	3.20729e-05	0	0	0	0	0	0	0	0	1.42243e-05	0	0	1.43221e-05	0	1.42428e-05	1.39338e-05	0	0	0	0	0	0	0	0	0	0
Lunulospora	0	0	0	0	0	0	0	0	0	0	0	0	0	0	0	0	0	9.71597e-05	0	0	0	0	0	0	0	0	0	0	0	0	0	0	0	0	0	0	0	0	0	0	0	0	0	0	0	0	0	0	0
Orpinomyces	0	0	0	0	0	0	0	0	0	0	0	0	0	0	0	0	0	9.71597e-05	0	0	0	1.39355e-05	0	0	0	0	0	0	0	0	0	0	0	0	0	0	0	0	0	0	0	0	0	0	0	0	0	0	0
Kregervanrija	0	0	0	0	0	0	0	0	0	0	0	0	0	0	0	0	0	9.71597e-05	0	0	0	0	0	0	0	0	0	0	0	0	0	0	0	0	0	0	0	0	0	0	0	0	0	0	0	0	0	0	0
Retroconis	0	0	0	0	0	0	0	0	0	0	0	0	0	0	0	0	0	9.71597e-05	6.38539e-05	0	0	0	0	0	0	0	0	0	0	0	0	0	0	0	0	0	0	0	0	0	0	0	0	0	0	0	0	3.03453e-05	0
Lopharia	0	0	0	0	0	0	0	0	0	0	0	0	0	0	0	0	0	9.71597e-05	0	0	0	0	0	0	0	0	0	0	0	0	0	0	0	0	0	0	0	0	0	0	0	0	0	0	0	0	0	0	0
Cryptodiscus	0	0	0	0	0	0	0	0	0	0	0	0	0	0	0	0	0	9.71597e-05	4.78904e-05	0	0	0	0	0	0	0	0	0	0	0	0	0	0	0	0	0	0	0	0	0	0	0	0	0	0	0	0	0	0
Laccaria	0	0	0	0	0	0	0	0	0	0	0	0	0	0	0	0	0	4.85798e-05	0	0	0	0	0	0	0	0	0	0	0	0	0	0	0	0	0	0	0	0	0	0	0	0	0	0	0	0	0	0	0
Vertexicola	0	0	0	0	0	0	0	0	0	0	0	0	0	0	4.40373e-05	0	0	0	0	1.42978e-05	0	0	0	1.60364e-05	0	0	0	0	0	0	0	0	0	0	0	0	0	0	0	0	0	0	0	0	0	0	0	0	0
Xylomelasma	0	0	0	0	0	0	0	0	0	0	0	9.60815e-05	0	0	0	0	0	0	0	0	0	0	0	0	0	0	0	0	0	0	0	0	0	0	0	0	0	0	0	0	0	1.60346e-05	0	0	0	0	0	0	0
Sympodiella	0	0	0	0	0	0	0	0	0	0	0	0	0	0	0	0	0	0	9.57809e-05	0	0	0	0	0	0	0	0	0	0	0	0	0	0	0	0	0	0	0	0	0	0	0	0	0	0	0	0	0	0
Pseudoomphalina	0	0	0	0	0	0	0	0	0	0	0	0	0	0	0	0	0	1.61933e-05	9.57809e-05	0	0	0	0	0	0	0	0	0	0	0	0	0	0	0	0	0	0	0	0	0	0	0	0	0	0	0	0	0	0
Holwaya	0	0	0	0	0	0	0	0	0	0	0	0	0	0	0	0	0	0	9.57809e-05	0	0	0	0	0	0	0	0	0	0	0	0	0	0	0	0	0	0	0	0	0	0	0	0	0	0	0	0	0	0
Glarea	0	0	0	0	0	0	0	0	0	0	0	1.60136e-05	0	0	0	0	0	0	9.57809e-05	0	0	0	0	0	0	0	0	0	0	0	0	0	0	0	0	1.43221e-05	0	0	0	0	0	0	0	0	0	0	0	0	0
Sphaerodes	0	0	0	0	0	0	0	0	0	0	0	0	0	0	0	0	0	0	0	0	0	0	0	0	0	0	0	0	0	0	0	0	0	0	0	0	0	0	0	0	0	0	0	0	0	0	0	0	0
Lentinula	0	0	0	0	0	0	0	0	0	0	0	0	0	0	0	0	0	1.61933e-05	0	0	0	0	0	0	0	0	0	0	0	0	0	0	0	0	0	0	0	0	0	0	0	0	0	0	0	0	0	0	0
Rhizosphaera	0	0	0	0	0	0	0	0	0	0	0	0	0	0	0	0	0	0	0	0	0	0	0	0	0	0	0	0	0	0	0	0	0	0	0	0	0	0	0	0	0	0	0	0	0	0	0	0	9.30622e-05
Psilocybe	0	0	0	0	0	0	0	0	0	0	0	0	0	0	0	0	0	4.85798e-05	7.98174e-05	0	0	0	0	0	0	0	0	0	0	0	0	0	0	0	0	0	0	0	0	0	0	0	0	0	0	0	0	0	0
Sarea	0	0	0	0	0	0	0	0	0	0	0	0	0	0	0	0	0	0	0	0	0	0	0	0	0	0	0	0	0	0	0	0	0	0	0	0	0	0	0	0	0	0	0	0	0	9.12575e-05	0	0	0
Mycoarthris	0	1.47822e-05	1.429e-05	0	1.46291e-05	0	9.1065e-05	1.46709e-05	1.3836e-05	0	0	1.60136e-05	0	6.99751e-05	0	5.96668e-05	0	0	0	2.85955e-05	0	1.39355e-05	0	1.60364e-05	0	0	0	0	0	0	0	0	0	0	0	8.59328e-05	0	1.42428e-05	0	0	0	1.60346e-05	0	0	0	0	0	0	0
Exidia	0	0	0	0	0	0	0	0	0	0	0	0	0	0	0	8.95001e-05	0	0	0	0	0	0	0	0	0	0	0	0	0	0	0	0	0	0	0	0	0	0	0	0	0	0	0	0	0	0	0	0	0
Melanotaenium	0	0	0	8.94055e-05	0	0	0	0	0	0	0	0	0	0	0	0	0	0	0	0	0	0	0	0	0	0	0	0	0	0	0	0	0	0	0	0	0	0	0	0	0	0	0	0	0	0	0	0	0
Cladobotryum	0	0	0	0	0	0	0	0	0	0	0	0	0	0	0	0	0	0	0	0	0	0	0	0	0	0	0	0	0	0	0	0	0	0	0	0	0	0	0	0	1.53718e-05	0	0	0	0	0	0	0	0
Spencermartinsia	0	0	0	0	0	0	0	0	0	0	0	0	0	0	0	0	0	0	0	0	0	0	0	0	0	0	0	0	0	0	0	0	0	0	0	0	0	0	0	0	0	0	0	0	0	0	0	0	0
Pilidiella	0	0	0	0	0	0	0	0	0	0	0	1.60136e-05	0	0	0	0	0	8.09664e-05	0	0	0	0	0	0	0	0	0	0	0	0	0	0	0	0	0	0	0	0	0	0	0	1.60346e-05	4.69381e-05	0	0	0	0	0	0
Scleromitrula	0	0	0	0	0	0	0	0	0	0	0	0	0	0	0	0	0	0	0	8.57866e-05	0	2.78711e-05	0	0	0	0	0	0	0	0	0	0	0	0	0	0	1.39952e-05	0	0	0	0	0	0	0	0	0	0	0	0
Scopulariopsis	0	0	0	0	0	0	0	0	0	0	0	0	5.58784e-05	1.3995e-05	0	0	0	0	0	0	0	1.39355e-05	0	0	0	0	0	0	0	0	0	0	0	0	0	1.43221e-05	0	0	0	0	0	0	0	0	0	0	0	0	0
Lemonniera	1.52679e-05	1.47822e-05	0	0	0	0	0	0	0	0	0	0	1.39696e-05	0	0	0	8.49341e-05	0	0	5.71911e-05	0	0	0	0	0	0	0	0	0	0	0	0	0	0	0	0	0	0	0	0	0	0	0	0	0	0	0	0	0
Drechslerella	0	0	0	0	0	0	0	0	0	0	0	0	0	8.39701e-05	0	0	0	0	0	0	0	0	0	0	0	0	0	0	0	0	0	0	0	0	0	0	0	0	0	0	0	0	0	0	0	0	0	0	0
Phaeodactylium	0	0	0	0	0	0	0	0	0	0	0	0	1.39696e-05	0	0	0	0	0	0	0	0	8.36132e-05	1.40491e-05	0	0	0	0	0	0	0	0	0	0	0	0	0	0	0	0	0	0	0	0	0	0	0	0	0	0
Hygroaster	0	0	0	0	0	0	0	0	0	0	0	0	0	0	0	0	0	0	0	0	0	0	0	0	0	0	0	0	0	0	0	0	0	0	0	0	0	0	0	0	0	0	0	0	0	0	0	0	0
Tolypocladium	0	0	0	0	0	0	0	0	0	0	0	0	0	0	0	0	0	0	0	0	0	0	0	0	0	0	0	0	0	0	0	0	0	0	0	0	0	0	0	0	0	0	0	0	0	0	0	0	0
Parasola	0	0	0	0	2.92582e-05	0	0	0	0	0	2.90634e-05	3.20272e-05	1.39696e-05	0	0	0	0	0	0	0	0	0	0	0	0	8.27278e-05	0	0	0	0	0	0	0	0	0	0	0	0	0	0	0	0	0	0	0	0	0	0	0
Hyphodontia	0	0	0	0	0	0	0	0	0	0	0	0	0	0	0	0	0	0	4.78904e-05	0	0	0	0	0	0	0	0	0	0	0	0	0	0	0	0	0	0	0	0	0	0	0	0	0	0	0	0	0	0
Acarospora	0	0	0	0	0	0	0	0	0	0	0	0	0	0	0	0	0	8.09664e-05	0	0	0	0	0	0	0	0	0	0	0	0	0	0	0	0	0	0	0	0	0	0	0	0	0	0	0	0	0	0	0
Pustularia	0	0	0	0	0	0	0	0	0	0	0	0	0	0	0	0	0	8.09664e-05	0	0	0	0	0	0	0	0	0	0	0	0	0	0	0	0	0	0	0	0	0	0	0	0	0	0	0	0	0	0	0
Vermiculariopsiella	0	0	0	0	0	0	0	0	0	0	0	0	0	0	0	0	0	8.09664e-05	0	0	0	0	0	0	0	0	0	0	0	0	0	0	0	0	0	0	0	0	0	0	0	0	0	0	0	0	0	0	0
Annulohypoxylon	0	0	0	0	0	0	0	0	0	0	0	0	0	0	0	0	0	0	0	0	0	0	0	0	0	0	0	0	0	0	0	0	0	0	0	0	0	0	0	0	0	0	0	0	0	0	0	0	0
Ophiostoma	0	0	0	0	0	0	0	0	0	0	0	0	0	0	0	0	0	0	0	0	0	0	0	0	0	1.3788e-05	0	1.38464e-05	0	0	1.38414e-05	4.15305e-05	0	1.38359e-05	0	0	0	0	0	0	0	8.01732e-05	0	0	0	0	0	0	0
Coniolariella	0	0	0	0	0	0	0	0	0	0	0	0	0	0	0	0	0	3.23866e-05	7.98174e-05	0	0	0	0	0	0	0	0	0	0	0	0	0	0	0	0	0	0	0	0	0	0	0	0	0	0	0	0	0	0
Adisciso	0	0	0	0	0	0	0	0	0	0	0	0	0	0	0	0	0	3.23866e-05	7.98174e-05	0	0	0	0	0	0	0	0	0	0	0	0	0	0	0	0	0	0	0	0	0	0	0	0	0	0	0	0	0	0
Monodictys	0	0	0	0	0	0	0	0	0	0	0	0	0	0	0	0	0	0	7.98174e-05	0	0	0	0	0	0	0	0	0	0	0	0	0	0	0	0	0	0	0	0	0	0	0	0	0	0	0	0	0	0
Zygosaccharomyces	0	0	0	0	0	0	0	0	0	0	0	0	0	0	0	0	0	0	7.98174e-05	0	0	0	0	0	0	0	0	0	0	0	0	0	0	0	0	0	0	0	0	0	0	0	0	0	0	0	0	0	0
Valsa	0	0	0	0	0	0	0	0	1.3836e-05	0	0	0	1.39696e-05	0	0	0	0	0	7.98174e-05	7.14888e-05	0	0	0	0	0	0	0	0	0	0	0	0	0	0	0	0	0	0	0	0	0	0	0	0	0	0	0	0	0
Millerozyma	0	0	0	0	0	0	0	0	0	0	0	0	0	0	0	1.49167e-05	0	0	0	0	0	0	1.40491e-05	0	7.98148e-05	0	0	0	0	0	0	0	0	0	0	0	1.39952e-05	0	0	0	0	0	0	0	0	0	0	0	0
Rhytidhysteron	0	0	0	0	0	0	0	0	0	4.12218e-05	0	3.20272e-05	5.58784e-05	0	0	0	0	0	0	0	0	0	0	0	0	0	0	0	0	0	0	0	1.42243e-05	0	1.3885e-05	4.29664e-05	2.79904e-05	0	0	0	0	0	0	0	0	0	0	0	0
Microporus	0	0	0	0	0	0	0	0	0	0	0	0	0	0	0	0	0	6.47731e-05	1.59635e-05	0	0	0	0	0	0	0	0	0	0	0	0	0	0	0	0	0	0	0	0	0	1.53718e-05	1.60346e-05	7.82301e-05	0	0	0	0	0	0
Cosmospora	0	0	0	0	0	0	0	0	0	0	0	0	0	0	0	0	0	0	0	0	0	0	0	0	0	0	0	0	0	0	0	0	0	0	0	0	0	0	0	0	0	0	0	0	0	0	0	0	0
Exidiopsis	0	0	0	0	0	0	7.58875e-05	0	0	0	0	0	0	0	0	0	0	0	0	0	0	0	0	0	0	0	0	0	0	0	0	0	0	0	0	0	0	0	0	0	0	0	0	0	0	0	0	0	0
Helicobasidium	0	0	0	0	0	0	0	0	0	0	0	0	0	0	0	0	0	0	0	0	0	0	0	0	0	0	0	0	0	0	0	0	0	0	0	0	0	0	0	0	0	0	0	0	0	0	0	0	0
Fusidium	0	0	0	0	0	0	0	0	0	0	0	0	0	0	0	0	0	0	0	0	0	0	0	0	0	0	0	0	0	0	0	0	0	0	0	0	0	0	0	0	0	0	0	0	0	0	0	0	0
Membranomyces	0	0	0	0	0	0	0	0	0	0	0	0	0	0	0	7.45835e-05	0	0	0	0	0	0	0	0	0	0	0	0	0	0	0	0	0	0	0	0	0	0	0	0	0	0	0	0	0	0	0	0	0
Williopsis	0	0	0	0	0	0	0	0	0	0	0	0	2.79392e-05	0	0	7.45835e-05	0	0	0	0	0	0	0	0	0	0	0	0	0	0	0	0	0	0	0	1.43221e-05	0	0	0	0	0	0	0	0	0	0	0	0	0
Montagnula	0	0	1.429e-05	7.45045e-05	0	0	0	0	0	0	0	0	0	0	0	0	0	0	0	0	0	0	0	0	0	0	0	0	0	0	0	0	0	0	0	0	0	0	0	0	0	0	0	0	0	0	0	0	0
Monosporascus	0	0	0	0	0	0	0	7.33547e-05	0	0	0	0	2.79392e-05	0	0	2.98334e-05	0	6.47731e-05	0	7.14888e-05	0	0	0	0	0	0	0	0	0	0	0	0	0	0	0	0	0	0	4.18014e-05	0	0	3.20693e-05	0	0	0	0	0	0	0
Campylocarpon	0	0	0	0	0	0	0	0	0	0	0	0	0	0	0	0	0	4.85798e-05	0	0	0	0	0	0	0	0	0	0	0	0	0	0	0	0	0	0	0	0	0	0	4.61155e-05	0	0	0	0	0	0	0	0
Paratritirachium	0	0	0	0	0	0	0	0	0	0	0	0	0	0	0	0	0	1.61933e-05	4.78904e-05	0	0	0	0	0	0	0	0	0	0	0	0	0	0	0	0	0	0	0	0	0	0	0	0	0	0	0	0	0	0
Rigidoporus	0	1.47822e-05	0	0	0	0	0	0	0	0	0	0	0	0	1.46791e-05	0	0	0	0	0	0	0	0	4.81093e-05	0	0	0	0	0	0	0	0	0	0	0	4.29664e-05	0	2.84856e-05	0	0	0	0	0	0	0	0	4.58519e-05	0	0
Bjerkandera	0	0	0	0	0	0	0	0	0	0	2.90634e-05	0	5.58784e-05	0	0	0	0	0	0	7.14888e-05	0	0	0	1.60364e-05	0	0	0	0	0	0	0	0	0	0	0	0	0	0	0	0	0	0	0	0	0	0	0	0	0
Brettanomyces	0	0	0	0	0	0	0	0	0	0	0	0	1.39696e-05	0	0	0	4.24671e-05	0	0	7.14888e-05	0	2.78711e-05	0	0	0	0	0	0	0	2.73474e-05	0	0	0	0	0	0	0	0	0	0	0	0	0	0	0	0	0	0	0
Monochaetia	0	0	4.287e-05	0	0	0	0	0	0	0	0	0	0	0	0	2.98334e-05	0	0	0	0	0	0	0	0	0	0	0	0	0	0	0	0	0	0	0	0	0	7.12139e-05	0	0	0	0	0	0	0	0	0	0	0
Rosenscheldia	1.52679e-05	0	0	0	0	0	0	0	0	0	0	0	0	0	0	0	7.07784e-05	0	0	1.42978e-05	0	0	1.40491e-05	1.60364e-05	0	0	0	1.38464e-05	0	0	0	0	0	0	0	0	1.39952e-05	0	0	0	0	0	0	0	0	0	0	0	0
Mycotribulus	0	0	0	0	0	0	0	0	0	0	0	0	0	6.99751e-05	0	0	0	0	0	0	0	0	0	0	0	0	0	0	0	0	0	0	0	2.76717e-05	0	0	0	0	0	0	0	0	0	1.58198e-05	0	0	0	0	0
Rhinocladiella	4.58036e-05	0	0	0	0	0	0	0	0	0	0	0	0	6.99751e-05	0	0	0	0	0	0	0	1.39355e-05	0	0	0	0	0	0	0	0	0	0	0	0	0	0	0	0	0	0	0	0	0	0	0	0	0	0	0
Dissoconium	0	0	0	0	0	0	0	0	0	0	0	1.60136e-05	0	0	0	0	0	3.23866e-05	0	2.85955e-05	0	2.78711e-05	0	0	0	1.3788e-05	0	0	0	0	0	0	0	0	0	0	0	2.84856e-05	0	0	0	0	0	0	0	0	0	0	0
Triparticalcar	0	0	0	1.49009e-05	0	0	0	0	0	0	0	0	2.79392e-05	0	0	0	0	0	0	0	0	0	0	0	0	0	0	0	0	0	0	0	0	0	0	0	0	0	0	0	0	0	0	0	0	0	0	0	0
Septobasidium	0	0	0	0	0	0	0	0	0	0	0	0	0	0	0	0	0	6.47731e-05	0	0	0	0	0	0	0	0	0	0	0	0	0	0	0	0	0	0	0	0	0	0	0	0	0	0	0	0	3.0568e-05	0	0
Arthroascus	0	0	0	0	0	0	0	0	0	0	0	0	0	0	0	0	0	0	0	0	0	0	0	0	0	0	0	0	0	0	0	0	0	0	0	0	0	0	0	0	0	0	0	0	0	0	0	0	0
Grammothele	0	0	1.429e-05	0	0	0	0	1.46709e-05	0	0	0	0	0	5.59801e-05	0	0	0	0	0	0	0	0	0	0	0	0	0	0	0	0	0	0	0	0	0	0	0	0	0	1.39667e-05	0	1.60346e-05	0	0	0	0	0	0	0
Neocallimastix	0	0	0	0	0	0	0	0	0	0	0	0	0	0	0	0	0	3.23866e-05	0	0	0	0	0	0	6.38519e-05	0	0	0	0	0	0	0	0	0	0	0	0	0	0	0	0	0	0	0	0	0	0	0	0
Wojnowicia	0	0	0	0	0	0	0	0	0	0	0	0	0	0	0	0	0	0	0	0	0	0	0	0	0	0	0	0	0	0	0	0	0	0	0	0	0	0	0	0	0	0	0	0	0	0	0	0	0
Cephalotrichiella	0	0	0	0	0	0	0	0	0	0	0	4.80407e-05	0	0	0	0	0	0	0	0	0	0	0	0	0	0	0	0	0	0	0	0	0	0	0	0	0	0	0	0	0	0	0	0	0	0	0	0	0
Protubera	0	0	0	0	0	0	0	0	0	0	0	0	0	0	0	0	0	0	0	0	0	0	0	0	0	0	0	0	0	0	0	0	0	0	0	0	0	0	0	0	0	0	1.5646e-05	0	0	0	0	0	0
Volvopluteus	0	0	0	0	0	0	0	0	0	0	0	0	0	0	0	0	0	6.47731e-05	0	0	0	0	0	0	0	0	0	0	0	0	0	0	0	0	0	0	0	0	0	0	0	0	0	0	0	0	0	0	0
Pulvinula	0	0	0	0	0	0	0	0	0	0	0	0	0	0	0	0	0	6.47731e-05	0	0	0	0	0	0	0	0	0	0	0	0	0	0	0	0	0	0	0	0	0	0	0	0	0	0	0	0	0	0	0
Streptobotrys	0	0	0	0	0	0	0	0	0	0	0	0	0	0	0	0	0	6.47731e-05	0	0	0	0	0	0	0	0	0	0	0	0	0	0	0	0	0	0	0	0	0	0	0	0	0	0	0	0	0	0	0
Candelariella	0	0	0	0	0	0	0	0	0	0	0	0	0	0	0	0	0	6.47731e-05	0	0	0	0	0	0	0	0	0	0	0	0	0	0	0	0	0	0	0	0	0	0	0	0	0	0	0	0	0	0	0
Nomuraea	0	0	0	0	1.46291e-05	0	1.51775e-05	0	0	0	0	6.40543e-05	0	0	0	0	0	0	0	0	0	0	0	0	0	0	0	0	0	0	0	0	1.42243e-05	0	0	1.43221e-05	0	0	0	0	0	0	0	0	0	0	0	0	0
Crepidotus	0	0	0	0	0	0	0	0	0	0	0	6.40543e-05	0	0	0	0	0	0	0	0	0	0	0	0	0	0	0	0	0	0	0	0	0	0	0	0	0	0	0	0	0	0	0	0	0	0	0	0	0
Scutellinia	0	1.47822e-05	0	0	2.92582e-05	0	0	0	0	0	0	6.40543e-05	0	0	4.40373e-05	0	0	0	0	0	0	1.39355e-05	0	0	0	0	0	0	0	0	0	0	0	0	1.3885e-05	1.43221e-05	0	0	0	0	0	0	0	0	0	0	0	0	0
Cuphophyllus	0	0	0	0	0	0	0	0	0	0	0	0	0	0	0	0	0	0	6.38539e-05	0	0	0	0	0	0	0	0	0	0	0	0	0	0	0	0	0	0	0	0	0	0	0	0	0	0	0	0	0	0
Rasamsonia	0	0	0	0	0	0	0	0	0	0	0	0	0	0	1.46791e-05	0	1.41557e-05	4.85798e-05	6.38539e-05	0	0	0	0	0	0	0	4.10273e-05	0	0	0	0	0	0	0	0	0	0	0	0	0	0	0	0	0	0	0	0	0	0
Lophium	0	0	0	0	0	0	0	0	0	0	0	0	0	0	0	0	0	0	6.38539e-05	0	0	0	0	0	0	0	0	0	0	0	0	0	0	0	0	0	0	0	0	0	0	0	0	0	0	0	0	0	0
Xenopolyscytalum	0	0	0	0	0	0	0	0	0	0	0	0	0	0	0	0	0	3.23866e-05	6.38539e-05	0	0	0	0	0	0	0	0	0	0	0	0	0	0	0	0	0	0	0	0	0	0	0	0	0	0	0	0	0	0
Colpoma	0	0	0	0	0	0	0	0	0	0	0	0	0	0	0	0	0	1.61933e-05	6.38539e-05	0	0	0	0	0	0	0	0	0	0	0	0	0	0	0	0	0	0	0	0	0	0	0	0	0	0	0	0	0	0
Gliocephalotrichum	0	0	0	0	0	0	0	0	0	0	0	0	0	0	0	0	0	0	0	0	0	0	0	0	0	0	0	0	0	0	0	0	0	0	0	0	0	0	0	0	6.14874e-05	0	0	0	0	0	0	0	0
Leiotrametes	0	0	0	1.49009e-05	1.46291e-05	4.08513e-05	3.0355e-05	0	0	2.74812e-05	5.81269e-05	0	0	0	2.93582e-05	0	0	0	0	0	0	0	1.40491e-05	0	0	0	0	0	0	0	0	1.38435e-05	0	0	0	0	0	1.42428e-05	0	1.39667e-05	0	0	0	0	0	0	0	0	0
Ascosphaera	0	0	0	0	0	0	0	0	0	0	0	0	2.79392e-05	0	0	0	0	0	0	0	0	0	0	0	0	0	0	0	1.36973e-05	0	0	0	0	0	0	5.72885e-05	0	0	1.39338e-05	0	0	0	0	0	0	0	0	0	0
Dekkera	0	0	0	0	0	0	0	0	0	0	0	0	0	0	0	4.47501e-05	5.66227e-05	0	0	2.85955e-05	0	1.39355e-05	0	0	0	0	0	0	0	0	1.38414e-05	0	0	0	0	0	0	0	0	0	0	0	0	0	0	0	0	0	0
Petriella	0	1.47822e-05	0	0	0	0	0	0	0	0	0	0	0	5.59801e-05	0	0	0	0	0	0	0	2.78711e-05	0	0	0	0	0	0	0	0	0	0	0	0	0	2.86443e-05	0	0	0	0	0	0	0	0	0	0	0	0	0
Fuscoporia	0	0	0	0	0	0	0	0	1.3836e-05	0	0	0	5.58784e-05	0	0	0	0	1.61933e-05	0	0	0	0	0	0	0	0	0	0	0	0	0	0	0	0	0	0	0	0	0	0	1.53718e-05	0	0	0	0	0	0	0	0
Asterotremella	0	0	0	0	0	0	0	0	0	0	0	0	0	0	0	0	0	0	0	0	0	2.78711e-05	0	0	0	0	0	0	0	0	0	0	0	0	0	0	0	0	0	0	3.07437e-05	0	0	0	4.68428e-05	0	0	0	0
Coccomyces	0	0	0	0	0	0	0	0	0	0	0	0	0	0	0	0	0	0	0	0	0	0	0	0	0	0	0	0	0	0	5.53656e-05	0	0	0	0	0	0	0	0	0	0	0	0	0	0	0	0	0	0
Cyllamyces	0	0	0	0	0	0	0	0	0	0	0	0	0	0	0	0	0	0	0	0	0	0	0	0	0	0	0	0	0	0	0	0	0	0	0	0	0	0	0	0	0	0	0	0	0	0	0	0	0
Bandoniozyma	0	0	0	0	0	0	0	0	0	0	0	0	0	0	0	0	0	0	0	0	0	0	0	0	0	0	0	0	0	0	0	0	0	0	0	0	0	0	0	0	0	0	0	0	0	0	0	0	0
Sterigmatosporidium	0	2.95644e-05	0	0	0	0	1.51775e-05	0	0	0	0	0	0	0	0	0	0	0	0	0	0	1.39355e-05	0	0	0	0	0	0	0	0	0	0	0	0	0	0	0	0	0	0	0	0	0	0	0	0	0	0	0
Phaeophleospora	0	0	0	0	0	0	0	0	0	0	0	0	0	0	0	0	0	0	0	0	0	0	0	0	0	0	0	0	0	0	0	0	0	0	0	0	0	0	0	0	0	3.20693e-05	0	0	0	0	0	0	0
Arachnomyces	0	0	0	0	0	0	0	0	0	0	0	0	0	0	4.40373e-05	0	0	0	0	2.85955e-05	0	0	0	0	0	0	0	0	0	1.36737e-05	0	0	0	0	0	1.43221e-05	0	0	0	0	0	0	0	0	0	0	0	0	0
Sabuloglossum	0	0	0	0	0	0	0	0	0	0	0	0	0	0	0	0	0	3.23866e-05	0	0	0	0	0	0	0	0	0	0	0	0	0	0	0	0	0	0	0	0	0	0	0	0	1.5646e-05	0	0	0	0	0	0
Ascobolus	0	0	0	0	0	0	0	0	0	0	0	0	0	0	0	0	0	4.85798e-05	0	0	0	4.18066e-05	0	0	0	0	0	0	0	0	0	0	0	0	0	2.86443e-05	0	0	0	0	0	0	0	0	0	0	0	0	0
Fusicladium	0	0	0	0	0	0	0	0	0	0	0	0	0	0	0	0	0	4.85798e-05	0	0	0	0	0	0	0	0	0	0	0	0	0	0	0	0	0	0	0	0	0	0	0	0	0	0	0	0	0	0	0
Hymenoscyphus	0	0	0	0	0	0	0	0	0	0	0	0	0	0	0	0	0	4.85798e-05	0	0	0	0	0	0	0	0	0	0	0	0	0	0	0	0	0	0	0	0	0	0	0	0	0	0	0	0	0	0	0
Coniophora	0	0	0	0	0	0	0	2.93419e-05	0	0	0	0	0	0	0	0	0	4.85798e-05	0	0	0	0	0	0	0	0	0	0	0	0	0	0	0	0	0	0	0	0	0	0	0	0	0	0	0	0	0	0	0
Xylodon	0	0	0	0	0	0	0	0	0	0	0	0	0	0	0	0	0	4.85798e-05	0	0	0	0	0	0	0	0	0	0	0	0	0	0	0	0	0	0	0	0	0	0	0	0	0	0	0	0	0	0	0
Phaeoisaria	0	0	0	0	0	0	0	0	0	0	4.35951e-05	4.80407e-05	0	0	0	0	0	0	0	0	0	0	0	0	0	0	0	0	0	0	0	0	0	0	0	0	0	0	0	0	0	3.20693e-05	0	0	0	0	0	0	0
Auxarthron	0	0	0	0	0	0	0	0	0	0	0	0	0	0	0	0	0	0	4.78904e-05	0	0	0	0	0	0	0	0	0	0	0	0	0	0	0	0	0	0	0	0	0	0	0	0	0	0	0	0	0	0
Catenulostroma	0	0	0	0	0	0	0	0	0	0	0	0	0	0	0	0	0	0	0	0	0	0	0	0	0	0	0	0	0	0	0	0	0	0	0	0	2.79904e-05	0	0	0	0	0	0	0	4.68428e-05	0	0	0	0
Microglossum	0	0	0	0	0	0	0	0	0	0	0	0	0	0	0	0	0	0	0	0	0	0	0	0	0	0	0	0	0	0	0	0	0	0	0	0	0	0	0	0	0	0	0	0	0	0	0	0	0
Pseudofusicoccum	0	0	0	0	0	0	0	0	0	0	0	0	0	0	0	0	0	3.23866e-05	0	0	0	0	0	0	0	0	0	0	0	0	0	0	0	0	0	0	0	0	0	0	0	0	0	0	0	0	4.58519e-05	0	0
Minutisphaera	0	0	0	0	0	0	0	0	0	0	0	0	0	0	0	0	0	0	0	0	0	0	0	0	0	0	0	0	0	0	0	0	0	0	0	0	0	0	0	0	0	0	0	0	0	0	0	4.5518e-05	0
Tremellodendron	0	0	0	0	0	0	0	0	0	0	0	0	0	0	0	0	0	3.23866e-05	0	0	0	0	0	0	0	0	0	0	0	0	0	0	0	0	0	0	0	0	0	0	0	0	0	0	0	0	0	4.5518e-05	0
Drechslera	0	0	0	0	0	0	0	0	0	0	0	0	1.39696e-05	0	0	4.47501e-05	0	0	0	0	0	0	1.40491e-05	0	0	0	0	0	0	0	0	0	0	0	0	0	0	0	0	0	0	0	0	0	0	0	0	0	0
Yenia	0	0	0	0	0	0	0	0	0	0	0	0	0	1.3995e-05	1.46791e-05	4.47501e-05	0	0	0	0	0	4.18066e-05	0	1.60364e-05	0	0	0	0	0	0	0	0	0	0	0	0	0	0	0	0	0	0	0	0	0	0	0	0	0
Dacrymyces	0	0	0	0	0	0	0	0	0	0	0	0	0	0	0	4.47501e-05	0	0	0	0	0	0	0	0	0	0	0	0	0	0	0	0	0	0	0	0	0	0	0	0	0	0	0	0	0	0	0	0	0
Metacordyceps	0	0	0	2.98018e-05	0	0	0	4.40128e-05	0	0	0	0	0	0	0	0	0	0	0	0	0	0	0	0	0	0	0	0	0	0	0	0	0	0	0	0	0	0	0	0	0	0	0	0	0	0	0	0	0
Berkleasmium	0	0	0	0	4.38872e-05	0	0	0	0	0	0	0	0	0	0	0	0	0	0	0	0	0	0	0	0	0	0	0	0	0	0	0	0	0	0	0	0	0	0	0	0	0	0	0	0	0	0	0	0
Moniliella	0	0	0	0	0	2.72342e-05	0	0	0	0	4.35951e-05	0	0	0	2.93582e-05	0	0	0	0	1.42978e-05	0	0	0	0	0	0	0	0	0	2.73474e-05	0	0	0	0	0	0	1.39952e-05	0	0	0	0	0	0	0	0	0	0	0	0
Blumeria	0	0	0	0	0	0	0	0	0	0	4.35951e-05	0	0	0	0	0	0	0	0	0	0	0	0	0	0	0	0	0	0	0	0	0	0	0	0	2.86443e-05	0	0	0	0	0	0	0	0	0	0	0	0	0
Asteromella	0	0	0	0	0	0	0	0	0	0	0	0	0	0	0	0	0	0	0	0	0	0	0	0	0	0	0	0	0	0	0	0	0	0	0	0	0	0	0	0	0	0	0	0	0	0	0	0	0
Collophora	0	0	4.287e-05	0	0	0	0	0	0	0	0	0	0	0	0	0	0	0	0	0	0	0	0	0	0	0	0	0	0	0	0	0	0	0	0	0	0	0	0	0	0	0	0	0	0	0	0	0	0
Pyronema	0	0	0	0	0	0	0	0	0	0	0	0	0	0	0	0	0	0	0	0	0	0	0	0	0	0	0	0	0	0	0	0	0	0	0	0	0	4.27283e-05	0	0	0	0	0	0	0	0	0	0	0
Sporormiella	0	0	0	0	0	0	0	0	0	0	0	0	0	0	0	0	0	0	0	0	0	0	0	0	0	0	0	0	0	0	0	0	0	0	0	0	4.19856e-05	0	0	0	0	0	0	0	0	0	0	0	0
Tubaria	0	0	0	0	0	0	0	0	0	0	0	0	0	4.19851e-05	0	0	0	0	0	0	0	0	0	0	0	0	0	0	0	0	0	0	0	0	0	0	0	0	0	0	0	0	0	0	0	0	0	0	0
Phyllactinia	0	0	0	0	0	0	0	0	0	0	0	0	4.19088e-05	0	0	0	0	0	0	0	0	0	0	0	0	0	0	0	0	0	0	0	0	0	0	0	0	0	0	0	0	0	0	0	0	0	0	0	0
Creosphaeria	0	0	0	0	0	0	0	0	0	0	0	0	0	0	0	0	0	0	0	0	0	4.18066e-05	0	0	0	0	0	0	0	0	0	0	0	0	0	0	0	0	0	0	0	0	0	0	0	0	0	0	0
Dothidea	0	0	0	0	0	0	0	0	0	0	0	0	0	1.3995e-05	0	0	0	0	0	2.85955e-05	0	4.18066e-05	0	0	0	0	0	0	0	0	0	0	0	0	0	0	0	0	0	0	0	0	0	0	0	0	0	0	0
Conidiobolus	0	0	0	0	0	0	0	0	0	0	0	0	0	0	0	0	0	0	0	0	0	4.18066e-05	0	0	0	0	0	0	0	0	0	1.38435e-05	0	0	0	0	0	0	0	0	0	0	0	0	0	0	0	0	0
Ceratorhiza	0	0	0	0	0	0	0	0	0	0	0	0	0	0	1.46791e-05	0	0	0	0	0	1.41983e-05	4.18066e-05	0	0	0	0	0	0	0	0	0	0	0	0	0	0	0	0	0	0	0	0	0	0	0	0	0	0	0
Torulaspora	0	0	0	0	0	0	0	0	0	0	0	0	0	0	0	0	0	0	0	0	0	0	0	0	0	0	0	0	0	0	0	0	0	0	0	0	0	0	0	0	0	0	0	0	0	0	0	0	0
Veronaeopsis	0	0	0	0	0	0	0	0	0	0	0	0	0	0	0	0	0	0	0	0	0	0	0	0	0	0	0	0	0	0	0	0	0	0	0	0	0	0	0	0	0	0	0	0	0	0	0	0	0
Alatospora	0	0	0	0	0	0	0	0	0	0	0	0	0	0	0	0	0	3.23866e-05	0	0	0	0	0	0	0	0	0	0	0	0	0	0	0	0	0	0	0	0	0	0	0	0	0	0	0	0	0	0	0
Whalleya	0	0	0	0	0	0	0	0	0	0	0	3.20272e-05	0	0	0	0	0	0	0	0	0	0	0	0	0	0	0	0	0	0	0	0	0	0	0	0	0	0	0	0	0	0	0	0	0	0	0	0	0
Tulostoma	1.52679e-05	0	1.429e-05	0	0	0	0	0	0	0	0	3.20272e-05	0	0	0	0	0	0	0	0	0	0	0	0	0	0	0	0	0	0	0	0	0	0	0	0	0	0	0	0	0	0	0	0	0	0	0	0	0
Stropharia	0	0	0	0	0	0	0	0	0	0	0	3.20272e-05	1.39696e-05	1.3995e-05	1.46791e-05	1.49167e-05	0	0	0	0	0	0	0	0	0	0	0	0	0	0	0	0	0	0	0	0	0	0	0	0	0	0	0	0	0	0	0	0	0
Crustoderma	3.05357e-05	0	0	0	0	0	0	0	0	0	0	0	0	1.3995e-05	0	0	0	0	0	0	0	0	0	0	0	0	0	0	0	0	0	0	0	0	0	0	0	0	0	0	0	0	0	0	0	0	0	0	0
Anomalomyces	0	0	0	0	0	0	0	0	0	0	0	0	0	0	0	0	0	0	0	0	0	0	0	0	0	0	0	0	0	0	0	0	0	0	0	2.86443e-05	0	0	0	2.79334e-05	0	0	0	0	0	0	0	0	0
Elaphocordyceps	0	0	0	0	1.46291e-05	0	0	0	2.76721e-05	0	0	0	0	0	0	0	0	0	0	0	0	0	0	0	0	0	0	0	0	0	0	0	0	0	0	2.86443e-05	0	1.42428e-05	1.39338e-05	0	0	0	0	0	0	0	0	0	0
Limnoperdon	0	1.47822e-05	0	0	0	1.36171e-05	0	0	0	0	0	0	0	0	0	0	0	0	0	2.85955e-05	0	0	0	0	0	0	0	0	0	0	0	0	0	0	0	2.86443e-05	0	0	0	0	0	0	0	0	0	0	0	0	0
Aphanoascus	1.52679e-05	0	0	0	0	0	0	0	0	0	0	0	0	0	0	0	0	0	0	0	0	0	0	0	0	0	0	0	0	0	0	0	0	0	0	2.86443e-05	0	0	0	0	0	0	0	0	0	0	0	0	0
Cystodendron	0	0	2.858e-05	0	0	0	0	0	0	0	0	0	0	0	0	0	0	0	0	0	0	2.78711e-05	0	0	0	0	0	0	0	0	0	0	0	0	0	0	0	0	0	0	0	0	0	0	0	0	0	0	0
Pycnoporus	0	0	0	0	0	0	0	0	0	0	0	0	0	0	0	0	0	0	0	0	0	0	0	0	0	0	0	0	0	0	0	0	0	0	0	0	2.79904e-05	0	0	0	0	0	0	0	0	0	0	0	0
Itersonilia	0	0	0	0	0	0	0	0	0	0	0	0	1.39696e-05	0	0	0	0	1.61933e-05	0	0	0	2.78711e-05	0	0	0	0	0	0	0	0	0	0	0	0	0	0	0	0	0	0	0	0	0	0	0	0	0	0	0
Cirrenalia	0	0	0	0	0	0	0	0	0	0	0	0	0	1.3995e-05	0	0	0	0	0	0	0	2.78711e-05	0	0	0	0	0	0	0	0	0	0	0	0	0	0	0	0	0	0	0	0	0	0	0	0	0	0	0
Variocladium	0	0	0	0	0	0	0	0	0	0	0	0	1.39696e-05	0	0	0	0	0	0	0	0	0	0	0	0	0	0	0	0	0	0	0	0	0	0	1.43221e-05	0	0	2.78676e-05	0	0	0	0	0	0	0	0	0	0
Chlorophyllum	0	0	0	0	1.46291e-05	0	0	0	0	0	0	0	0	0	0	0	0	0	0	1.42978e-05	0	0	0	0	0	2.75759e-05	0	0	0	0	0	0	0	0	0	0	0	0	0	0	0	0	0	0	0	0	0	0	0
Armillaria	0	0	0	0	0	0	0	0	0	0	0	0	0	0	0	0	0	1.61933e-05	0	0	0	0	0	0	0	0	0	0	0	0	0	0	0	0	0	1.43221e-05	0	0	0	0	0	0	0	0	0	0	0	0	0
Cryptovalsa	0	0	0	0	0	0	0	0	0	0	0	1.60136e-05	0	0	0	0	0	0	0	0	0	0	0	0	0	0	0	0	0	0	0	0	0	0	0	1.43221e-05	0	0	0	0	0	0	0	0	0	0	0	0	0
Hypholoma	0	0	0	0	0	0	0	0	0	0	0	1.60136e-05	1.39696e-05	0	0	0	0	0	0	0	0	0	0	0	0	0	0	0	0	0	0	0	0	0	0	0	0	0	0	1.39667e-05	0	0	0	0	0	0	0	0	0
Neophaeosphaeria	1.52679e-05	0	0	0	0	0	0	0	0	0	0	0	0	0	0	0	0	0	0	0	0	1.39355e-05	0	0	0	0	0	0	0	0	0	0	0	0	1.3885e-05	0	0	0	0	0	0	0	0	0	0	0	0	0	0
Tortispora	1.52679e-05	0	0	0	0	0	0	0	0	0	0	0	0	0	0	0	0	0	0	0	0	0	0	0	0	0	0	0	0	0	0	0	0	0	0	1.43221e-05	0	0	0	1.39667e-05	0	0	0	0	0	0	0	0	0
Pleurostomophora	0	0	0	0	0	0	0	0	0	0	0	0	0	0	0	0	0	0	0	0	0	0	1.40491e-05	0	0	0	0	0	0	0	0	0	0	0	0	1.43221e-05	0	0	0	0	0	0	0	0	0	0	0	0	0
Others	0.35849	0.260876	0.281685	0.418432	0.407288	0.468279	0.348916	0.26908	0.311463	0.270525	0.300545	0.385287	0.489998	0.496851	0.468836	0.467027	0.513724	0.506429	0.56656	0.432136	0.508228	0.460291	0.233847	0.353283	0.665145	0.137714	0.115943	0.222553	0.142795	0.147047	0.261395	0.259677	0.158459	0.194532	0.249889	0.446779	0.421648	0.449844	0.319669	0.322449	0.52647	0.503888	0.400648	0.498545	0.591062	0.409442	0.470716	0.396704	0.431095
[truncated: 31 more columns]

## Sheet: Table S6
Table S6. RDA statistics of the continuous cropping soils in winter.
	RDA1	RDA2	r2	Pr(>r)
TOC	-0.3907	-0.9205	0.4114	0.016
pH	0.9806	-0.1961	0.626	0.001
TN	0.1453	-0.9894	0.3793	0.024
Available N	-0.0154	-0.9999	0.1392	0.291
Available P	-0.9248	-0.3804	0.3589	0.023
Available K	-0.9993	0.0383	0.0062	0.94

## Sheet: Table S7
Table S7. RDA statistics of the rotational cropping soils in winter.
	RDA1	RDA2	r2	Pr(>r)
TOC	-0.9971	0.0757	0.7044	0.001
pH	0.9999	-0.0103	0.3588	0.023
TN	-0.9816	0.1911	0.2532	0.087
Available N	-0.9659	-0.259	0.1267	0.34
Available P	-0.9556	-0.2946	0.2138	0.126
Available K	-0.4303	-0.9027	0.0745	0.534
